# Supplementary material for: Comparative Analysis of anti-Shine- Dalgarno Function in Flavobacterium johnsoniae and Escherichia coli
Source: Front Mol Biosci. 2021 Dec 13;8:787388. doi: 10.3389/fmolb.2021.787388 (PMC8710568; doi:10.3389/fmolb.2021.787388)
Supplement: Supplementary file 1 [file Table2.xlsx]

## Sheet: TableS2
Assembly	Species	NCBI taxonomy	GTDB taxonomy	assembly found	NCBI taxid	prfB found	FS found by ARFA	ORF0 E-value	FS accepted
GCA_000159995.1	Alloprevotella tannerae ATCC 51259	d__Bacteria; p__Bacteroidetes; c__Bacteroidia; o__Bacteroidales; f__Prevotellaceae; g__Alloprevotella; s__Alloprevotella tannerae	d__Bacteria; p__Bacteroidota; c__Bacteroidia; o__Bacteroidales; f__Bacteroidaceae; g__Alloprevotella; s__Alloprevotella tannerae	yes	626522	yes	no		no
GCA_000212915.1	Bacteroides coprosuis DSM 18011	d__Bacteria; p__Bacteroidetes; c__Bacteroidia; o__Bacteroidales; f__Bacteroidaceae; g__Bacteroides; s__Bacteroides coprosuis	d__Bacteria; p__Bacteroidota; c__Bacteroidia; o__Bacteroidales; f__Bacteroidaceae; g__Bacteroides_E; s__Bacteroides_E coprosuis	yes	679937	yes	yes	2e-05	yes
GCA_000375405.1	Bacteroides propionicifaciens DSM 19291 = JCM 14649	d__Bacteria; p__Bacteroidetes; c__Bacteroidia; o__Bacteroidales; f__Bacteroidaceae; g__Bacteroides; s__Bacteroides propionicifaciens	d__Bacteria; p__Bacteroidota; c__Bacteroidia; o__Bacteroidales; f__Bacteroidaceae; g__Bacteroides_E; s__Bacteroides_E propionicifaciens	no
GCA_000613385.1	Bacteroides acidifaciens JCM 10556	d__Bacteria; p__Bacteroidetes; c__Bacteroidia; o__Bacteroidales; f__Bacteroidaceae; g__Bacteroides; s__Bacteroides acidifaciens	d__Bacteria; p__Bacteroidota; c__Bacteroidia; o__Bacteroidales; f__Bacteroidaceae; g__Bacteroides; s__Bacteroides acidifaciens	no
GCA_900155865.1	Bacteroides bouchesdurhonensis	d__Bacteria; p__Bacteroidetes; c__Bacteroidia; o__Bacteroidales; f__Bacteroidaceae; g__Bacteroides; s__Bacteroides bouchesdurhonensis	d__Bacteria; p__Bacteroidota; c__Bacteroidia; o__Bacteroidales; f__Bacteroidaceae; g__Bacteroides; s__Bacteroides bouchesdurhonensis	no
GCA_002222615.2	Bacteroides caccae	d__Bacteria; p__Bacteroidetes; c__Bacteroidia; o__Bacteroidales; f__Bacteroidaceae; g__Bacteroides; s__Bacteroides caccae	d__Bacteria; p__Bacteroidota; c__Bacteroidia; o__Bacteroidales; f__Bacteroidaceae; g__Bacteroides; s__Bacteroides caccae	yes	47678	yes	yes	0.00012	yes
GCA_001688725.2	Bacteroides caecimuris	d__Bacteria; p__Bacteroidetes; c__Bacteroidia; o__Bacteroidales; f__Bacteroidaceae; g__Bacteroides; s__Bacteroides caecimuris	d__Bacteria; p__Bacteroidota; c__Bacteroidia; o__Bacteroidales; f__Bacteroidaceae; g__Bacteroides; s__Bacteroides caecimuris	yes	1796613	yes	yes	0.00012	yes
GCA_000158035.1	Bacteroides cellulosilyticus DSM 14838	d__Bacteria; p__Bacteroidetes; c__Bacteroidia; o__Bacteroidales; f__Bacteroidaceae; g__Bacteroides; s__Bacteroides cellulosilyticus	d__Bacteria; p__Bacteroidota; c__Bacteroidia; o__Bacteroidales; f__Bacteroidaceae; g__Bacteroides; s__Bacteroides cellulosilyticus	yes	537012	yes	no		no
GCA_900129655.1	Bacteroides clarus YIT 12056	d__Bacteria; p__Bacteroidetes; c__Bacteroidia; o__Bacteroidales; f__Bacteroidaceae; g__Bacteroides; s__Bacteroides clarus	d__Bacteria; p__Bacteroidota; c__Bacteroidia; o__Bacteroidales; f__Bacteroidaceae; g__Bacteroides; s__Bacteroides clarus	yes	762984	yes	no		no
GCA_900130125.1	Bacteroides congonensis	d__Bacteria; p__Bacteroidetes; c__Bacteroidia; o__Bacteroidales; f__Bacteroidaceae; g__Bacteroides; s__Bacteroides congonensis	d__Bacteria; p__Bacteroidota; c__Bacteroidia; o__Bacteroidales; f__Bacteroidaceae; g__Bacteroides; s__Bacteroides congonensis	no
GCA_900241005.1	Bacteroides cutis	d__Bacteria; p__Bacteroidetes; c__Bacteroidia; o__Bacteroidales; f__Bacteroidaceae; g__Bacteroides; s__Bacteroides cutis	d__Bacteria; p__Bacteroidota; c__Bacteroidia; o__Bacteroidales; f__Bacteroidaceae; g__Bacteroides; s__Bacteroides cutis	no
GCA_000155815.1	Bacteroides eggerthii DSM 20697	d__Bacteria; p__Bacteroidetes; c__Bacteroidia; o__Bacteroidales; f__Bacteroidaceae; g__Bacteroides; s__Bacteroides eggerthii	d__Bacteria; p__Bacteroidota; c__Bacteroidia; o__Bacteroidales; f__Bacteroidaceae; g__Bacteroides; s__Bacteroides eggerthii	yes	483216	yes	no		no
GCA_000614145.1	Bacteroides faecichinchillae JCM 17102	d__Bacteria; p__Bacteroidetes; c__Bacteroidia; o__Bacteroidales; f__Bacteroidaceae; g__Bacteroides; s__Bacteroides faecichinchillae	d__Bacteria; p__Bacteroidota; c__Bacteroidia; o__Bacteroidales; f__Bacteroidaceae; g__Bacteroides; s__Bacteroides faecichinchillae	no
GCA_900106755.1	Bacteroides faecis MAJ27	d__Bacteria; p__Bacteroidetes; c__Bacteroidia; o__Bacteroidales; f__Bacteroidaceae; g__Bacteroides; s__Bacteroides faecis	d__Bacteria; p__Bacteroidota; c__Bacteroidia; o__Bacteroidales; f__Bacteroidaceae; g__Bacteroides; s__Bacteroides faecis	yes	1077285	yes	yes	0.00012	yes
GCA_000156195.1	Bacteroides finegoldii DSM 17565	d__Bacteria; p__Bacteroidetes; c__Bacteroidia; o__Bacteroidales; f__Bacteroidaceae; g__Bacteroides; s__Bacteroides finegoldii	d__Bacteria; p__Bacteroidota; c__Bacteroidia; o__Bacteroidales; f__Bacteroidaceae; g__Bacteroides; s__Bacteroides finegoldii	yes	483215	yes	yes	0.00012	yes
GCA_000195635.1	Bacteroides fluxus YIT 12057	d__Bacteria; p__Bacteroidetes; c__Bacteroidia; o__Bacteroidales; f__Bacteroidaceae; g__Bacteroides; s__Bacteroides fluxus	d__Bacteria; p__Bacteroidota; c__Bacteroidia; o__Bacteroidales; f__Bacteroidaceae; g__Bacteroides; s__Bacteroides fluxus	yes	763034	yes	no		no
GCA_000025985.1	Bacteroides fragilis NCTC 9343	d__Bacteria; p__Bacteroidetes; c__Bacteroidia; o__Bacteroidales; f__Bacteroidaceae; g__Bacteroides; s__Bacteroides fragilis	d__Bacteria; p__Bacteroidota; c__Bacteroidia; o__Bacteroidales; f__Bacteroidaceae; g__Bacteroides; s__Bacteroides fragilis	yes	272559	yes	yes	0.00012	yes
GCA_000374365.1	Bacteroides gallinarum DSM 18171 = JCM 13658	d__Bacteria; p__Bacteroidetes; c__Bacteroidia; o__Bacteroidales; f__Bacteroidaceae; g__Bacteroides; s__Bacteroides gallinarum	d__Bacteria; p__Bacteroidota; c__Bacteroidia; o__Bacteroidales; f__Bacteroidaceae; g__Bacteroides; s__Bacteroides gallinarum	no
GCA_000428125.1	Bacteroides graminisolvens DSM 19988 = JCM 15093	d__Bacteria; p__Bacteroidetes; c__Bacteroidia; o__Bacteroidales; f__Bacteroidaceae; g__Bacteroides; s__Bacteroides graminisolvens	d__Bacteria; p__Bacteroidota; c__Bacteroidia; o__Bacteroidales; f__Bacteroidaceae; g__Bacteroides; s__Bacteroides graminisolvens	no
GCA_000186225.1	Bacteroides helcogenes P 36-108	d__Bacteria; p__Bacteroidetes; c__Bacteroidia; o__Bacteroidales; f__Bacteroidaceae; g__Bacteroides; s__Bacteroides helcogenes	d__Bacteria; p__Bacteroidota; c__Bacteroidia; o__Bacteroidales; f__Bacteroidaceae; g__Bacteroides; s__Bacteroides helcogenes	yes	693979	yes	no		no
GCA_004342845.1	Bacteroides heparinolyticus	d__Bacteria; p__Bacteroidetes; c__Bacteroidia; o__Bacteroidales; f__Bacteroidaceae; g__Bacteroides; s__Bacteroides heparinolyticus	d__Bacteria; p__Bacteroidota; c__Bacteroidia; o__Bacteroidales; f__Bacteroidaceae; g__Bacteroides; s__Bacteroides heparinolyticus	yes	28113	yes	no		no
GCA_900104585.1	Bacteroides ihuae	d__Bacteria; p__Bacteroidetes; c__Bacteroidia; o__Bacteroidales; f__Bacteroidaceae; g__Bacteroides; s__Bacteroides ihuae	d__Bacteria; p__Bacteroidota; c__Bacteroidia; o__Bacteroidales; f__Bacteroidaceae; g__Bacteroides; s__Bacteroides ihuae	no
GCA_000172175.1	Bacteroides intestinalis DSM 17393	d__Bacteria; p__Bacteroidetes; c__Bacteroidia; o__Bacteroidales; f__Bacteroidaceae; g__Bacteroides; s__Bacteroides intestinalis	d__Bacteria; p__Bacteroidota; c__Bacteroidia; o__Bacteroidales; f__Bacteroidaceae; g__Bacteroides; s__Bacteroides intestinalis	yes	471870	yes	no		no
GCA_900128905.1	Bacteroides luti	d__Bacteria; p__Bacteroidetes; c__Bacteroidia; o__Bacteroidales; f__Bacteroidaceae; g__Bacteroides; s__Bacteroides luti	d__Bacteria; p__Bacteroidota; c__Bacteroidia; o__Bacteroidales; f__Bacteroidaceae; g__Bacteroides; s__Bacteroides luti	yes	1297750	yes	yes	0.00012	yes
GCA_900128475.1	Mediterranea massiliensis	d__Bacteria; p__Bacteroidetes; c__Bacteroidia; o__Bacteroidales; f__Bacteroidaceae; g__Mediterranea; s__Mediterranea massiliensis	d__Bacteria; p__Bacteroidota; c__Bacteroidia; o__Bacteroidales; f__Bacteroidaceae; g__Bacteroides; s__Bacteroides massiliensis	no
GCA_900108345.1	Bacteroides ndongoniae	d__Bacteria; p__Bacteroidetes; c__Bacteroidia; o__Bacteroidales; f__Bacteroidaceae; g__Bacteroides; s__Bacteroides ndongoniae	d__Bacteria; p__Bacteroidota; c__Bacteroidia; o__Bacteroidales; f__Bacteroidaceae; g__Bacteroides; s__Bacteroides ndongoniae	no
GCA_000499785.1	Bacteroides neonati	d__Bacteria; p__Bacteroidetes; c__Bacteroidia; o__Bacteroidales; f__Bacteroidaceae; g__Bacteroides; s__Bacteroides neonati	d__Bacteria; p__Bacteroidota; c__Bacteroidia; o__Bacteroidales; f__Bacteroidaceae; g__Bacteroides; s__Bacteroides neonati	no
GCA_000613465.1	Bacteroides nordii WAL 11050 = JCM 12987	d__Bacteria; p__Bacteroidetes; c__Bacteroidia; o__Bacteroidales; f__Bacteroidaceae; g__Bacteroides; s__Bacteroides nordii	d__Bacteria; p__Bacteroidota; c__Bacteroidia; o__Bacteroidales; f__Bacteroidaceae; g__Bacteroides; s__Bacteroides nordii	no
GCA_000315485.1	Bacteroides oleiciplenus YIT 12058	d__Bacteria; p__Bacteroidetes; c__Bacteroidia; o__Bacteroidales; f__Bacteroidaceae; g__Bacteroides; s__Bacteroides oleiciplenus	d__Bacteria; p__Bacteroidota; c__Bacteroidia; o__Bacteroidales; f__Bacteroidaceae; g__Bacteroides; s__Bacteroides oleiciplenus	yes	742727	yes	no		no
GCA_001314995.1	Bacteroides ovatus	d__Bacteria; p__Bacteroidetes; c__Bacteroidia; o__Bacteroidales; f__Bacteroidaceae; g__Bacteroides; s__Bacteroides ovatus	d__Bacteria; p__Bacteroidota; c__Bacteroidia; o__Bacteroidales; f__Bacteroidaceae; g__Bacteroides; s__Bacteroides ovatus	yes	28116	yes	yes	0.00012	yes
GCA_000511775.1	Bacteroides pyogenes JCM 10003	d__Bacteria; p__Bacteroidetes; c__Bacteroidia; o__Bacteroidales; f__Bacteroidaceae; g__Bacteroides; s__Bacteroides pyogenes	d__Bacteria; p__Bacteroidota; c__Bacteroidia; o__Bacteroidales; f__Bacteroidaceae; g__Bacteroides; s__Bacteroides pyogenes_A	yes	1235813	yes	yes	0.00012	yes
GCA_000428105.1	Bacteroides pyogenes DSM 20611 = JCM 6294	d__Bacteria; p__Bacteroidetes; c__Bacteroidia; o__Bacteroidales; f__Bacteroidaceae; g__Bacteroides; s__Bacteroides pyogenes	d__Bacteria; p__Bacteroidota; c__Bacteroidia; o__Bacteroidales; f__Bacteroidaceae; g__Bacteroides; s__Bacteroides pyogenes	no
GCA_000517545.1	Bacteroides reticulotermitis JCM 10512	d__Bacteria; p__Bacteroidetes; c__Bacteroidia; o__Bacteroidales; f__Bacteroidaceae; g__Bacteroides; s__Bacteroides reticulotermitis	d__Bacteria; p__Bacteroidota; c__Bacteroidia; o__Bacteroidales; f__Bacteroidaceae; g__Bacteroides; s__Bacteroides reticulotermitis	yes	1445607	yes	yes	0.00011	yes
GCA_000614125.1	Bacteroides rodentium JCM 16496	d__Bacteria; p__Bacteroidetes; c__Bacteroidia; o__Bacteroidales; f__Bacteroidaceae; g__Bacteroides; s__Bacteroides rodentium	d__Bacteria; p__Bacteroidota; c__Bacteroidia; o__Bacteroidales; f__Bacteroidaceae; g__Bacteroides; s__Bacteroides rodentium	no
GCA_000381365.1	Bacteroides salyersiae WAL 10018 = DSM 18765 = JCM 12988	d__Bacteria; p__Bacteroidetes; c__Bacteroidia; o__Bacteroidales; f__Bacteroidaceae; g__Bacteroides; s__Bacteroides salyersiae	d__Bacteria; p__Bacteroidota; c__Bacteroidia; o__Bacteroidales; f__Bacteroidaceae; g__Bacteroides; s__Bacteroides salyersiae	yes	1121101	yes	yes	0.00012	yes
GCA_000614165.1	Bacteroides stercorirosoris JCM 17103	d__Bacteria; p__Bacteroidetes; c__Bacteroidia; o__Bacteroidales; f__Bacteroidaceae; g__Bacteroides; s__Bacteroides stercorirosoris	d__Bacteria; p__Bacteroidota; c__Bacteroidia; o__Bacteroidales; f__Bacteroidaceae; g__Bacteroides; s__Bacteroides stercorirosoris	no
GCA_000154525.1	Bacteroides stercoris ATCC 43183	d__Bacteria; p__Bacteroidetes; c__Bacteroidia; o__Bacteroidales; f__Bacteroidaceae; g__Bacteroides; s__Bacteroides stercoris	d__Bacteria; p__Bacteroidota; c__Bacteroidia; o__Bacteroidales; f__Bacteroidaceae; g__Bacteroides; s__Bacteroides stercoris	yes	449673	yes	no		no
GCA_000011065.1	Bacteroides thetaiotaomicron VPI-5482	d__Bacteria; p__Bacteroidetes; c__Bacteroidia; o__Bacteroidales; f__Bacteroidaceae; g__Bacteroides; s__Bacteroides thetaiotaomicron	d__Bacteria; p__Bacteroidota; c__Bacteroidia; o__Bacteroidales; f__Bacteroidaceae; g__Bacteroides; s__Bacteroides thetaiotaomicron	yes	226186	yes	yes	0.00012	yes
GCA_000513195.1	Bacteroides timonensis	d__Bacteria; p__Bacteroidetes; c__Bacteroidia; o__Bacteroidales; f__Bacteroidaceae; g__Bacteroides; s__Bacteroides timonensis	d__Bacteria; p__Bacteroidota; c__Bacteroidia; o__Bacteroidales; f__Bacteroidaceae; g__Bacteroides; s__Bacteroides timonensis	no
GCA_900130135.1	Bacteroides togonis	d__Bacteria; p__Bacteroidetes; c__Bacteroidia; o__Bacteroidales; f__Bacteroidaceae; g__Bacteroides; s__Bacteroides togonis	d__Bacteria; p__Bacteroidota; c__Bacteroidia; o__Bacteroidales; f__Bacteroidaceae; g__Bacteroides; s__Bacteroides togonis	no
GCA_000154205.1	Bacteroides uniformis ATCC 8492	d__Bacteria; p__Bacteroidetes; c__Bacteroidia; o__Bacteroidales; f__Bacteroidaceae; g__Bacteroides; s__Bacteroides uniformis	d__Bacteria; p__Bacteroidota; c__Bacteroidia; o__Bacteroidales; f__Bacteroidaceae; g__Bacteroides; s__Bacteroides uniformis	yes	411479	yes	no		no
GCA_000210075.1	Bacteroides xylanisolvens XB1A	d__Bacteria; p__Bacteroidetes; c__Bacteroidia; o__Bacteroidales; f__Bacteroidaceae; g__Bacteroides; s__Bacteroides xylanisolvens	d__Bacteria; p__Bacteroidota; c__Bacteroidia; o__Bacteroidales; f__Bacteroidaceae; g__Bacteroides; s__Bacteroides xylanisolvens	yes	657309	yes	yes	0.00012	yes
GCA_002998435.1	Bacteroides zoogleoformans	d__Bacteria; p__Bacteroidetes; c__Bacteroidia; o__Bacteroidales; f__Bacteroidaceae; g__Bacteroides; s__Bacteroides zoogleoformans	d__Bacteria; p__Bacteroidota; c__Bacteroidia; o__Bacteroidales; f__Bacteroidaceae; g__Bacteroides; s__Bacteroides zoogleoformans	yes	28119	yes	no		no
GCA_000233955.1	Paraprevotella clara YIT 11840	d__Bacteria; p__Bacteroidetes; c__Bacteroidia; o__Bacteroidales; f__Prevotellaceae; g__Paraprevotella; s__Paraprevotella clara	d__Bacteria; p__Bacteroidota; c__Bacteroidia; o__Bacteroidales; f__Bacteroidaceae; g__Paraprevotella; s__Paraprevotella clara	yes	762968	yes	no		no
GCA_000205165.1	Paraprevotella xylaniphila YIT 11841	d__Bacteria; p__Bacteroidetes; c__Bacteroidia; o__Bacteroidales; f__Prevotellaceae; g__Paraprevotella; s__Paraprevotella xylaniphila	d__Bacteria; p__Bacteroidota; c__Bacteroidia; o__Bacteroidales; f__Bacteroidaceae; g__Paraprevotella; s__Paraprevotella xylaniphila	yes	762982	yes	no		no
GCA_000312445.1	Phocaeicola abscessus CCUG 55929	d__Bacteria; p__Bacteroidetes; c__Bacteroidia; o__Bacteroidales; f__; g__Phocaeicola; s__Phocaeicola abscessus	d__Bacteria; p__Bacteroidota; c__Bacteroidia; o__Bacteroidales; f__Bacteroidaceae; g__Phocaeicola; s__Phocaeicola abscessus	no
GCA_000374585.1	Bacteroides barnesiae DSM 18169 = JCM 13652	d__Bacteria; p__Bacteroidetes; c__Bacteroidia; o__Bacteroidales; f__Bacteroidaceae; g__Bacteroides; s__Bacteroides barnesiae	d__Bacteria; p__Bacteroidota; c__Bacteroidia; o__Bacteroidales; f__Bacteroidaceae; g__Phocaeicola; s__Phocaeicola barnesiae	no
GCA_000154845.1	Bacteroides coprocola DSM 17136	d__Bacteria; p__Bacteroidetes; c__Bacteroidia; o__Bacteroidales; f__Bacteroidaceae; g__Bacteroides; s__Bacteroides coprocola	d__Bacteria; p__Bacteroidota; c__Bacteroidia; o__Bacteroidales; f__Bacteroidaceae; g__Phocaeicola; s__Phocaeicola coprocola	yes	470145	yes	no		no
GCA_000157915.1	Bacteroides coprophilus DSM 18228 = JCM 13818	d__Bacteria; p__Bacteroidetes; c__Bacteroidia; o__Bacteroidales; f__Bacteroidaceae; g__Bacteroides; s__Bacteroides coprophilus	d__Bacteria; p__Bacteroidota; c__Bacteroidia; o__Bacteroidales; f__Bacteroidaceae; g__Phocaeicola; s__Phocaeicola coprophilus	yes	547042	yes	no		no
GCA_000156075.1	Bacteroides dorei DSM 17855	d__Bacteria; p__Bacteroidetes; c__Bacteroidia; o__Bacteroidales; f__Bacteroidaceae; g__Bacteroides; s__Bacteroides dorei	d__Bacteria; p__Bacteroidota; c__Bacteroidia; o__Bacteroidales; f__Bacteroidaceae; g__Phocaeicola; s__Phocaeicola dorei	yes	483217	yes	no		no
GCA_900128495.1	Bacteroides ilei	d__Bacteria; p__Bacteroidetes; c__Bacteroidia; o__Bacteroidales; f__Bacteroidaceae; g__Bacteroides; s__Bacteroides ilei	d__Bacteria; p__Bacteroidota; c__Bacteroidia; o__Bacteroidales; f__Bacteroidaceae; g__Phocaeicola; s__Phocaeicola ilei	no
GCA_000382445.1	Bacteroides massiliensis B84634 = Timone 84634 = DSM 17679 = JCM 13223	d__Bacteria; p__Bacteroidetes; c__Bacteroidia; o__Bacteroidales; f__Bacteroidaceae; g__Bacteroides; s__Bacteroides massiliensis	d__Bacteria; p__Bacteroidota; c__Bacteroidia; o__Bacteroidales; f__Bacteroidaceae; g__Phocaeicola; s__Phocaeicola massiliensis	yes	1121098	yes	no		no
GCA_900128455.1	Bacteroides mediterraneensis	d__Bacteria; p__Bacteroidetes; c__Bacteroidia; o__Bacteroidales; f__Bacteroidaceae; g__Bacteroides; s__Bacteroides mediterraneensis	d__Bacteria; p__Bacteroidota; c__Bacteroidia; o__Bacteroidales; f__Bacteroidaceae; g__Phocaeicola; s__Phocaeicola mediterraneensis	no
GCA_000613805.1	Bacteroides paurosaccharolyticus JCM 15092	d__Bacteria; p__Bacteroidetes; c__Bacteroidia; o__Bacteroidales; f__Bacteroidaceae; g__Bacteroides; s__Bacteroides paurosaccharolyticus	d__Bacteria; p__Bacteroidota; c__Bacteroidia; o__Bacteroidales; f__Bacteroidaceae; g__Phocaeicola; s__Phocaeicola paurosaccharolyticus	no
GCA_000187895.1	Bacteroides plebeius DSM 17135	d__Bacteria; p__Bacteroidetes; c__Bacteroidia; o__Bacteroidales; f__Bacteroidaceae; g__Bacteroides; s__Bacteroides plebeius	d__Bacteria; p__Bacteroidota; c__Bacteroidia; o__Bacteroidales; f__Bacteroidaceae; g__Phocaeicola; s__Phocaeicola plebeius	yes	484018	yes	no		no
GCA_000190575.1	Bacteroides salanitronis DSM 18170	d__Bacteria; p__Bacteroidetes; c__Bacteroidia; o__Bacteroidales; f__Bacteroidaceae; g__Bacteroides; s__Bacteroides salanitronis	d__Bacteria; p__Bacteroidota; c__Bacteroidia; o__Bacteroidales; f__Bacteroidaceae; g__Phocaeicola; s__Phocaeicola salanitronis	yes	667015	yes	no		no
GCA_000614185.1	Bacteroides sartorii JCM 17136 = DSM 21941	d__Bacteria; p__Bacteroidetes; c__Bacteroidia; o__Bacteroidales; f__Bacteroidaceae; g__Bacteroides; s__Bacteroides sartorii	d__Bacteria; p__Bacteroidota; c__Bacteroidia; o__Bacteroidales; f__Bacteroidaceae; g__Phocaeicola; s__Phocaeicola sartorii	no
GCA_000012825.1	Bacteroides vulgatus ATCC 8482	d__Bacteria; p__Bacteroidetes; c__Bacteroidia; o__Bacteroidales; f__Bacteroidaceae; g__Bacteroides; s__Bacteroides vulgatus	d__Bacteria; p__Bacteroidota; c__Bacteroidia; o__Bacteroidales; f__Bacteroidaceae; g__Phocaeicola; s__Phocaeicola vulgatus	yes	435590	yes	no		no
GCA_900106785.1	Prevotellamassilia timonensis	d__Bacteria; p__Bacteroidetes; c__Bacteroidia; o__Bacteroidales; f__Prevotellaceae; g__Prevotellamassilia; s__Prevotellamassilia timonensis	d__Bacteria; p__Bacteroidota; c__Bacteroidia; o__Bacteroidales; f__Bacteroidaceae; g__Prevotellamassilia; s__Prevotellamassilia timonensis	no
GCA_000426565.1	Prevotella albensis DSM 11370 = JCM 12258	d__Bacteria; p__Bacteroidetes; c__Bacteroidia; o__Bacteroidales; f__Prevotellaceae; g__Prevotella; s__Prevotella albensis	d__Bacteria; p__Bacteroidota; c__Bacteroidia; o__Bacteroidales; f__Bacteroidaceae; g__Prevotella; s__Prevotella albensis	no
GCA_000378745.1	Prevotella amnii DSM 23384 = JCM 14753	d__Bacteria; p__Bacteroidetes; c__Bacteroidia; o__Bacteroidales; f__Prevotellaceae; g__Prevotella; s__Prevotella amnii	d__Bacteria; p__Bacteroidota; c__Bacteroidia; o__Bacteroidales; f__Bacteroidaceae; g__Prevotella; s__Prevotella amnii	no
GCA_000614025.1	Prevotella aurantiaca JCM 15754	d__Bacteria; p__Bacteroidetes; c__Bacteroidia; o__Bacteroidales; f__Prevotellaceae; g__Prevotella; s__Prevotella aurantiaca	d__Bacteria; p__Bacteroidota; c__Bacteroidia; o__Bacteroidales; f__Bacteroidaceae; g__Prevotella; s__Prevotella aurantiaca	no
GCA_000426585.1	Prevotella baroniae DSM 16972 = JCM 13447	d__Bacteria; p__Bacteroidetes; c__Bacteroidia; o__Bacteroidales; f__Prevotellaceae; g__Prevotella; s__Prevotella baroniae	d__Bacteria; p__Bacteroidota; c__Bacteroidia; o__Bacteroidales; f__Bacteroidaceae; g__Prevotella; s__Prevotella baroniae	no
GCA_000160535.1	Prevotella bergensis DSM 17361	d__Bacteria; p__Bacteroidetes; c__Bacteroidia; o__Bacteroidales; f__Prevotellaceae; g__Prevotella; s__Prevotella bergensis	d__Bacteria; p__Bacteroidota; c__Bacteroidia; o__Bacteroidales; f__Bacteroidaceae; g__Prevotella; s__Prevotella bergensis	yes	585502	yes	no		no
GCA_000262545.1	Prevotella bivia DSM 20514	d__Bacteria; p__Bacteroidetes; c__Bacteroidia; o__Bacteroidales; f__Prevotellaceae; g__Prevotella; s__Prevotella bivia	d__Bacteria; p__Bacteroidota; c__Bacteroidia; o__Bacteroidales; f__Bacteroidaceae; g__Prevotella; s__Prevotella bivia	yes	868129	yes	no		no
GCA_000621725.1	Prevotella brevis ATCC 19188	d__Bacteria; p__Bacteroidetes; c__Bacteroidia; o__Bacteroidales; f__Prevotellaceae; g__Prevotella; s__Prevotella brevis	d__Bacteria; p__Bacteroidota; c__Bacteroidia; o__Bacteroidales; f__Bacteroidaceae; g__Prevotella; s__Prevotella brevis	no
GCA_000179055.1	Prevotella bryantii B14	d__Bacteria; p__Bacteroidetes; c__Bacteroidia; o__Bacteroidales; f__Prevotellaceae; g__Prevotella; s__Prevotella bryantii	d__Bacteria; p__Bacteroidota; c__Bacteroidia; o__Bacteroidales; f__Bacteroidaceae; g__Prevotella; s__Prevotella bryantii	yes	752555	yes	no		no
GCA_000184945.1	Prevotella buccae ATCC 33574	d__Bacteria; p__Bacteroidetes; c__Bacteroidia; o__Bacteroidales; f__Prevotellaceae; g__Prevotella; s__Prevotella buccae	d__Bacteria; p__Bacteroidota; c__Bacteroidia; o__Bacteroidales; f__Bacteroidaceae; g__Prevotella; s__Prevotella buccae	yes	873513	yes	no		no
GCA_000177075.1	Prevotella buccalis ATCC 35310	d__Bacteria; p__Bacteroidetes; c__Bacteroidia; o__Bacteroidales; f__Prevotellaceae; g__Prevotella; s__Prevotella buccalis	d__Bacteria; p__Bacteroidota; c__Bacteroidia; o__Bacteroidales; f__Bacteroidaceae; g__Prevotella; s__Prevotella buccalis	yes	679190	yes	no		no
GCA_003096815.1	Prevotella colorans	d__Bacteria; p__Bacteroidetes; c__Bacteroidia; o__Bacteroidales; f__Prevotellaceae; g__Prevotella; s__Prevotella colorans	d__Bacteria; p__Bacteroidota; c__Bacteroidia; o__Bacteroidales; f__Bacteroidaceae; g__Prevotella; s__Prevotella colorans	yes	1703337	yes	no		no
GCA_000157935.1	Prevotella copri DSM 18205	d__Bacteria; p__Bacteroidetes; c__Bacteroidia; o__Bacteroidales; f__Prevotellaceae; g__Prevotella; s__Prevotella copri	d__Bacteria; p__Bacteroidota; c__Bacteroidia; o__Bacteroidales; f__Bacteroidaceae; g__Prevotella; s__Prevotella copri	yes	537011	yes	no		no
GCA_000430525.1	Prevotella corporis DSM 18810 = JCM 8529	d__Bacteria; p__Bacteroidetes; c__Bacteroidia; o__Bacteroidales; f__Prevotellaceae; g__Prevotella; s__Prevotella corporis	d__Bacteria; p__Bacteroidota; c__Bacteroidia; o__Bacteroidales; f__Bacteroidaceae; g__Prevotella; s__Prevotella corporis	no
GCA_000614065.1	Prevotella dentasini JCM 15908	d__Bacteria; p__Bacteroidetes; c__Bacteroidia; o__Bacteroidales; f__Prevotellaceae; g__Prevotella; s__Prevotella dentasini	d__Bacteria; p__Bacteroidota; c__Bacteroidia; o__Bacteroidales; f__Bacteroidaceae; g__Prevotella; s__Prevotella dentasini	no
GCA_000613585.1	Prevotella denticola DSM 20614 = JCM 13449	d__Bacteria; p__Bacteroidetes; c__Bacteroidia; o__Bacteroidales; f__Prevotellaceae; g__Prevotella; s__Prevotella denticola	d__Bacteria; p__Bacteroidota; c__Bacteroidia; o__Bacteroidales; f__Bacteroidaceae; g__Prevotella; s__Prevotella denticola	no
GCA_000613345.1	Prevotella disiens JCM 6334 = ATCC 29426	d__Bacteria; p__Bacteroidetes; c__Bacteroidia; o__Bacteroidales; f__Prevotellaceae; g__Prevotella; s__Prevotella disiens	d__Bacteria; p__Bacteroidota; c__Bacteroidia; o__Bacteroidales; f__Bacteroidaceae; g__Prevotella; s__Prevotella disiens	no
GCA_000613405.1	Prevotella enoeca JCM 12259	d__Bacteria; p__Bacteroidetes; c__Bacteroidia; o__Bacteroidales; f__Prevotellaceae; g__Prevotella; s__Prevotella enoeca	d__Bacteria; p__Bacteroidota; c__Bacteroidia; o__Bacteroidales; f__Bacteroidaceae; g__Prevotella; s__Prevotella enoeca	no
GCA_000613945.1	Prevotella falsenii DSM 22864 = JCM 15124	d__Bacteria; p__Bacteroidetes; c__Bacteroidia; o__Bacteroidales; f__Prevotellaceae; g__Prevotella; s__Prevotella falsenii	d__Bacteria; p__Bacteroidota; c__Bacteroidia; o__Bacteroidales; f__Bacteroidaceae; g__Prevotella; s__Prevotella falsenii	no
GCA_001262015.1	Prevotella fusca JCM 17724	d__Bacteria; p__Bacteroidetes; c__Bacteroidia; o__Bacteroidales; f__Prevotellaceae; g__Prevotella; s__Prevotella fusca	d__Bacteria; p__Bacteroidota; c__Bacteroidia; o__Bacteroidales; f__Bacteroidaceae; g__Prevotella; s__Prevotella fusca	yes	1236517	yes	no		no
GCA_000613925.1	Prevotella histicola JCM 15637 = DNF00424	d__Bacteria; p__Bacteroidetes; c__Bacteroidia; o__Bacteroidales; f__Prevotellaceae; g__Prevotella; s__Prevotella histicola	d__Bacteria; p__Bacteroidota; c__Bacteroidia; o__Bacteroidales; f__Bacteroidaceae; g__Prevotella; s__Prevotella histicola	no
GCA_900155655.1	Prevotella ihumii	d__Bacteria; p__Bacteroidetes; c__Bacteroidia; o__Bacteroidales; f__Prevotellaceae; g__Prevotella; s__Prevotella ihumii	d__Bacteria; p__Bacteroidota; c__Bacteroidia; o__Bacteroidales; f__Bacteroidaceae; g__Prevotella; s__Prevotella ihumii	no
GCA_001953955.1	Prevotella intermedia ATCC 25611 = DSM 20706	d__Bacteria; p__Bacteroidetes; c__Bacteroidia; o__Bacteroidales; f__Prevotellaceae; g__Prevotella; s__Prevotella intermedia	d__Bacteria; p__Bacteroidota; c__Bacteroidia; o__Bacteroidales; f__Bacteroidaceae; g__Prevotella; s__Prevotella intermedia	yes	1122984	yes	no		no
GCA_900187995.1	Prevotella jejuni	d__Bacteria; p__Bacteroidetes; c__Bacteroidia; o__Bacteroidales; f__Prevotellaceae; g__Prevotella; s__Prevotella jejuni	d__Bacteria; p__Bacteroidota; c__Bacteroidia; o__Bacteroidales; f__Bacteroidaceae; g__Prevotella; s__Prevotella jejuni	yes	1177574	yes	no		no
GCA_900079775.1	Prevotella lascolaii	d__Bacteria; p__Bacteroidetes; c__Bacteroidia; o__Bacteroidales; f__Prevotellaceae; g__Prevotella; s__Prevotella lascolaii	d__Bacteria; p__Bacteroidota; c__Bacteroidia; o__Bacteroidales; f__Bacteroidaceae; g__Prevotella; s__Prevotella lascolaii	no
GCA_000378085.1	Prevotella loescheii DSM 19665 = JCM 12249 = ATCC 15930	d__Bacteria; p__Bacteroidetes; c__Bacteroidia; o__Bacteroidales; f__Prevotellaceae; g__Prevotella; s__Prevotella loescheii	d__Bacteria; p__Bacteroidota; c__Bacteroidia; o__Bacteroidales; f__Bacteroidaceae; g__Prevotella; s__Prevotella loescheii	no
GCA_000382385.1	Prevotella maculosa DSM 19339 = JCM 15638	d__Bacteria; p__Bacteroidetes; c__Bacteroidia; o__Bacteroidales; f__Prevotellaceae; g__Prevotella; s__Prevotella maculosa	d__Bacteria; p__Bacteroidota; c__Bacteroidia; o__Bacteroidales; f__Bacteroidaceae; g__Prevotella; s__Prevotella maculosa	no
GCA_000146675.1	Prevotella marshii DSM 16973 = JCM 13450	d__Bacteria; p__Bacteroidetes; c__Bacteroidia; o__Bacteroidales; f__Prevotellaceae; g__Prevotella; s__Prevotella marshii	d__Bacteria; p__Bacteroidota; c__Bacteroidia; o__Bacteroidales; f__Bacteroidaceae; g__Prevotella; s__Prevotella marshii	yes	862515	yes	no		no
GCA_000144405.1	Prevotella melaninogenica ATCC 25845	d__Bacteria; p__Bacteroidetes; c__Bacteroidia; o__Bacteroidales; f__Prevotellaceae; g__Prevotella; s__Prevotella melaninogenica	d__Bacteria; p__Bacteroidota; c__Bacteroidia; o__Bacteroidales; f__Bacteroidaceae; g__Prevotella; s__Prevotella melaninogenica	yes	553174	yes	no		no
GCA_000614105.1	Prevotella micans DSM 21469 = JCM 16134	d__Bacteria; p__Bacteroidetes; c__Bacteroidia; o__Bacteroidales; f__Prevotellaceae; g__Prevotella; s__Prevotella micans	d__Bacteria; p__Bacteroidota; c__Bacteroidia; o__Bacteroidales; f__Bacteroidaceae; g__Prevotella; s__Prevotella micans	no
GCA_000191065.1	Prevotella multiformis DSM 16608	d__Bacteria; p__Bacteroidetes; c__Bacteroidia; o__Bacteroidales; f__Prevotellaceae; g__Prevotella; s__Prevotella multiformis	d__Bacteria; p__Bacteroidota; c__Bacteroidia; o__Bacteroidales; f__Bacteroidaceae; g__Prevotella; s__Prevotella multiformis	yes	888743	yes	no		no
GCA_000218235.1	Prevotella multisaccharivorax DSM 17128	d__Bacteria; p__Bacteroidetes; c__Bacteroidia; o__Bacteroidales; f__Prevotellaceae; g__Prevotella; s__Prevotella multisaccharivorax	d__Bacteria; p__Bacteroidota; c__Bacteroidia; o__Bacteroidales; f__Bacteroidaceae; g__Prevotella; s__Prevotella multisaccharivorax	yes	688246	yes	no		no
GCA_000379965.1	Prevotella nanceiensis DSM 19126 = JCM 15639	d__Bacteria; p__Bacteroidetes; c__Bacteroidia; o__Bacteroidales; f__Prevotellaceae; g__Prevotella; s__Prevotella nanceiensis	d__Bacteria; p__Bacteroidota; c__Bacteroidia; o__Bacteroidales; f__Bacteroidaceae; g__Prevotella; s__Prevotella nanceiensis	no
GCA_000220235.1	Prevotella nigrescens ATCC 33563	d__Bacteria; p__Bacteroidetes; c__Bacteroidia; o__Bacteroidales; f__Prevotellaceae; g__Prevotella; s__Prevotella nigrescens	d__Bacteria; p__Bacteroidota; c__Bacteroidia; o__Bacteroidales; f__Bacteroidaceae; g__Prevotella; s__Prevotella nigrescens	yes	997352	yes	no		no
GCA_000185145.2	Prevotella oralis ATCC 33269	d__Bacteria; p__Bacteroidetes; c__Bacteroidia; o__Bacteroidales; f__Prevotellaceae; g__Prevotella; s__Prevotella oralis	d__Bacteria; p__Bacteroidota; c__Bacteroidia; o__Bacteroidales; f__Bacteroidaceae; g__Prevotella; s__Prevotella oralis	yes	873533	yes	no		no
GCA_900637655.1	Prevotella oris	d__Bacteria; p__Bacteroidetes; c__Bacteroidia; o__Bacteroidales; f__Prevotellaceae; g__Prevotella; s__Prevotella oris	d__Bacteria; p__Bacteroidota; c__Bacteroidia; o__Bacteroidales; f__Bacteroidaceae; g__Prevotella; s__Prevotella oris	yes	28135	yes	no		no
GCA_000585355.1	Prevotella oryzae DSM 17970	d__Bacteria; p__Bacteroidetes; c__Bacteroidia; o__Bacteroidales; f__Prevotellaceae; g__Prevotella; s__Prevotella oryzae	d__Bacteria; p__Bacteroidota; c__Bacteroidia; o__Bacteroidales; f__Bacteroidaceae; g__Prevotella; s__Prevotella oryzae	no
GCA_000613785.1	Prevotella oulorum JCM 14966	d__Bacteria; p__Bacteroidetes; c__Bacteroidia; o__Bacteroidales; f__Prevotellaceae; g__Prevotella; s__Prevotella oulorum	d__Bacteria; p__Bacteroidota; c__Bacteroidia; o__Bacteroidales; f__Bacteroidaceae; g__Prevotella; s__Prevotella oulorum	no
GCA_000220255.1	Prevotella pallens ATCC 700821	d__Bacteria; p__Bacteroidetes; c__Bacteroidia; o__Bacteroidales; f__Prevotellaceae; g__Prevotella; s__Prevotella pallens	d__Bacteria; p__Bacteroidota; c__Bacteroidia; o__Bacteroidales; f__Bacteroidaceae; g__Prevotella; s__Prevotella pallens	yes	997353	yes	no		no
GCA_000373185.1	Prevotella paludivivens DSM 17968 = JCM 13650	d__Bacteria; p__Bacteroidetes; c__Bacteroidia; o__Bacteroidales; f__Prevotellaceae; g__Prevotella; s__Prevotella paludivivens	d__Bacteria; p__Bacteroidota; c__Bacteroidia; o__Bacteroidales; f__Bacteroidaceae; g__Prevotella; s__Prevotella paludivivens	no
GCA_000613725.1	Prevotella pleuritidis JCM 14110	d__Bacteria; p__Bacteroidetes; c__Bacteroidia; o__Bacteroidales; f__Prevotellaceae; g__Prevotella; s__Prevotella pleuritidis	d__Bacteria; p__Bacteroidota; c__Bacteroidia; o__Bacteroidales; f__Bacteroidaceae; g__Prevotella; s__Prevotella pleuritidis	no
GCA_000025925.1	Prevotella ruminicola 23	d__Bacteria; p__Bacteroidetes; c__Bacteroidia; o__Bacteroidales; f__Prevotellaceae; g__Prevotella; s__Prevotella ruminicola	d__Bacteria; p__Bacteroidota; c__Bacteroidia; o__Bacteroidales; f__Bacteroidaceae; g__Prevotella; s__Prevotella ruminicola	yes	264731	yes	no		no
GCA_000614205.1	Prevotella saccharolytica JCM 17484	d__Bacteria; p__Bacteroidetes; c__Bacteroidia; o__Bacteroidales; f__Prevotellaceae; g__Prevotella; s__Prevotella saccharolytica	d__Bacteria; p__Bacteroidota; c__Bacteroidia; o__Bacteroidales; f__Bacteroidaceae; g__Prevotella; s__Prevotella saccharolytica	no
GCA_000185845.1	Prevotella salivae DSM 15606	d__Bacteria; p__Bacteroidetes; c__Bacteroidia; o__Bacteroidales; f__Prevotellaceae; g__Prevotella; s__Prevotella salivae	d__Bacteria; p__Bacteroidota; c__Bacteroidia; o__Bacteroidales; f__Bacteroidaceae; g__Prevotella; s__Prevotella salivae	yes	888832	yes	no		no
GCA_001683355.1	Prevotella scopos JCM 17725	d__Bacteria; p__Bacteroidetes; c__Bacteroidia; o__Bacteroidales; f__Prevotellaceae; g__Prevotella; s__Prevotella scopos	d__Bacteria; p__Bacteroidota; c__Bacteroidia; o__Bacteroidales; f__Bacteroidaceae; g__Prevotella; s__Prevotella scopos	yes	1236518	yes	no		no
GCA_000518545.1	Hallella seregens ATCC 51272	d__Bacteria; p__Bacteroidetes; c__Bacteroidia; o__Bacteroidales; f__Prevotellaceae; g__Prevotella; s__[Hallella] seregens	d__Bacteria; p__Bacteroidota; c__Bacteroidia; o__Bacteroidales; f__Bacteroidaceae; g__Prevotella; s__Prevotella seregens	no
GCA_000613445.1	Prevotella shahii DSM 15611 = JCM 12083	d__Bacteria; p__Bacteroidetes; c__Bacteroidia; o__Bacteroidales; f__Prevotellaceae; g__Prevotella; s__Prevotella shahii	d__Bacteria; p__Bacteroidota; c__Bacteroidia; o__Bacteroidales; f__Bacteroidaceae; g__Prevotella; s__Prevotella shahii	no
GCA_000235885.1	Prevotella stercorea DSM 18206	d__Bacteria; p__Bacteroidetes; c__Bacteroidia; o__Bacteroidales; f__Prevotellaceae; g__Prevotella; s__Prevotella stercorea	d__Bacteria; p__Bacteroidota; c__Bacteroidia; o__Bacteroidales; f__Bacteroidaceae; g__Prevotella; s__Prevotella stercorea	yes	1002367	yes	no		no
GCA_000455445.1	Prevotella timonensis 4401737 = DSM 22865 = JCM 15640	d__Bacteria; p__Bacteroidetes; c__Bacteroidia; o__Bacteroidales; f__Prevotellaceae; g__Prevotella; s__Prevotella timonensis	d__Bacteria; p__Bacteroidota; c__Bacteroidia; o__Bacteroidales; f__Bacteroidaceae; g__Prevotella; s__Prevotella timonensis	no
GCA_000377625.1	Prevotella veroralis DSM 19559 = JCM 6290	d__Bacteria; p__Bacteroidetes; c__Bacteroidia; o__Bacteroidales; f__Prevotellaceae; g__Prevotella; s__Prevotella veroralis	d__Bacteria; p__Bacteroidota; c__Bacteroidia; o__Bacteroidales; f__Bacteroidaceae; g__Prevotella; s__Prevotella veroralis	no
GCA_000296465.1	Barnesiella intestinihominis YIT 11860	d__Bacteria; p__Bacteroidetes; c__Bacteroidia; o__Bacteroidales; f__Barnesiellaceae; g__Barnesiella; s__Barnesiella intestinihominis	d__Bacteria; p__Bacteroidota; c__Bacteroidia; o__Bacteroidales; f__Barnesiellaceae; g__Barnesiella; s__Barnesiella intestinihominis	yes	742726	yes	yes	0.002	yes
GCA_000512915.1	Barnesiella viscericola DSM 18177	d__Bacteria; p__Bacteroidetes; c__Bacteroidia; o__Bacteroidales; f__Barnesiellaceae; g__Barnesiella; s__Barnesiella viscericola	d__Bacteria; p__Bacteroidota; c__Bacteroidia; o__Bacteroidales; f__Barnesiellaceae; g__Barnesiella; s__Barnesiella viscericola	yes	880074	yes	yes	0.0017	yes
GCA_000473955.1	Coprobacter fastidiosus NSB1	d__Bacteria; p__Bacteroidetes; c__Bacteroidia; o__Bacteroidales; f__Barnesiellaceae; g__Coprobacter; s__Coprobacter fastidiosus	d__Bacteria; p__Bacteroidota; c__Bacteroidia; o__Bacteroidales; f__Coprobacteraceae; g__Coprobacter; s__Coprobacter fastidiosus	yes	1349822	yes	yes	0.0028	yes
GCA_000803105.1	Coprobacter secundus	d__Bacteria; p__Bacteroidetes; c__Bacteroidia; o__Bacteroidales; f__Barnesiellaceae; g__Coprobacter; s__Coprobacter secundus	d__Bacteria; p__Bacteroidota; c__Bacteroidia; o__Bacteroidales; f__Coprobacteraceae; g__Coprobacter; s__Coprobacter secundus	yes	1501392	yes	yes	0.0004	yes
GCA_003201355.1	Dysgonomonas alginatilytica	d__Bacteria; p__Bacteroidetes; c__Bacteroidia; o__Bacteroidales; f__Dysgonamonadaceae; g__Dysgonomonas; s__Dysgonomonas alginatilytica	d__Bacteria; p__Bacteroidota; c__Bacteroidia; o__Bacteroidales; f__Dysgonomonadaceae; g__Dysgonomonas; s__Dysgonomonas alginatilytica	yes	1605892	yes	yes	0.0023	yes
GCA_000426485.1	Dysgonomonas capnocytophagoides DSM 22835	d__Bacteria; p__Bacteroidetes; c__Bacteroidia; o__Bacteroidales; f__Dysgonamonadaceae; g__Dysgonomonas; s__Dysgonomonas capnocytophagoides	d__Bacteria; p__Bacteroidota; c__Bacteroidia; o__Bacteroidales; f__Dysgonomonadaceae; g__Dysgonomonas; s__Dysgonomonas capnocytophagoides	no
GCA_000213555.1	Dysgonomonas gadei ATCC BAA-286	d__Bacteria; p__Bacteroidetes; c__Bacteroidia; o__Bacteroidales; f__Dysgonamonadaceae; g__Dysgonomonas; s__Dysgonomonas gadei	d__Bacteria; p__Bacteroidota; c__Bacteroidia; o__Bacteroidales; f__Dysgonomonadaceae; g__Dysgonomonas; s__Dysgonomonas gadei	yes	742766	yes	yes	0.0043	yes
GCA_001312525.1	Dysgonomonas hofstadii JCM 17038	d__Bacteria; p__Bacteroidetes; c__Bacteroidia; o__Bacteroidales; f__Dysgonamonadaceae; g__Dysgonomonas; s__Dysgonomonas hofstadii	d__Bacteria; p__Bacteroidota; c__Bacteroidia; o__Bacteroidales; f__Dysgonomonadaceae; g__Dysgonomonas; s__Dysgonomonas hofstadii	no
GCA_900128985.1	Dysgonomonas macrotermitis	d__Bacteria; p__Bacteroidetes; c__Bacteroidia; o__Bacteroidales; f__Dysgonamonadaceae; g__Dysgonomonas; s__Dysgonomonas macrotermitis	d__Bacteria; p__Bacteroidota; c__Bacteroidia; o__Bacteroidales; f__Dysgonomonadaceae; g__Dysgonomonas; s__Dysgonomonas macrotermitis	yes	1346286	yes	yes	0.0073	yes
GCA_000213575.1	Dysgonomonas mossii DSM 22836	d__Bacteria; p__Bacteroidetes; c__Bacteroidia; o__Bacteroidales; f__Dysgonamonadaceae; g__Dysgonomonas; s__Dysgonomonas mossii	d__Bacteria; p__Bacteroidota; c__Bacteroidia; o__Bacteroidales; f__Dysgonomonadaceae; g__Dysgonomonas; s__Dysgonomonas mossii	yes	742767	yes	yes	0.003	yes
GCA_001282625.1	Lascolabacillus massiliensis	d__Bacteria; p__Bacteroidetes; c__Bacteroidia; o__Bacteroidales; f__Porphyromonadaceae; g__Lascolabacillus; s__Lascolabacillus massiliensis	d__Bacteria; p__Bacteroidota; c__Bacteroidia; o__Bacteroidales; f__Dysgonomonadaceae; g__Fermentimonas; s__Fermentimonas massiliensis	no
GCA_900095795.1	Petrimonas mucosa	d__Bacteria; p__Bacteroidetes; c__Bacteroidia; o__Bacteroidales; f__Porphyromonadaceae; g__Petrimonas; s__Petrimonas mucosa	d__Bacteria; p__Bacteroidota; c__Bacteroidia; o__Bacteroidales; f__Dysgonomonadaceae; g__Petrimonas; s__Petrimonas mucosa	yes	1642646	yes	yes	0.004	yes
GCA_000380985.1	Proteiniphilum acetatigenes DSM 18083	d__Bacteria; p__Bacteroidetes; c__Bacteroidia; o__Bacteroidales; f__Dysgonamonadaceae; g__Proteiniphilum; s__Proteiniphilum acetatigenes	d__Bacteria; p__Bacteroidota; c__Bacteroidia; o__Bacteroidales; f__Dysgonomonadaceae; g__Proteiniphilum; s__Proteiniphilum acetatigenes	no
GCA_900095135.1	Proteiniphilum saccharofermentans	d__Bacteria; p__Bacteroidetes; c__Bacteroidia; o__Bacteroidales; f__Dysgonamonadaceae; g__Proteiniphilum; s__Proteiniphilum saccharofermentans	d__Bacteria; p__Bacteroidota; c__Bacteroidia; o__Bacteroidales; f__Dysgonomonadaceae; g__Proteiniphilum; s__Proteiniphilum saccharofermentans	yes	1642647	yes	yes	0.0014	yes
GCA_001192835.1	Lentimicrobium saccharophilum	d__Bacteria; p__Bacteroidetes; c__Bacteroidia; o__Bacteroidales; f__Lentimicrobiaceae; g__Lentimicrobium; s__Lentimicrobium saccharophilum	d__Bacteria; p__Bacteroidota; c__Bacteroidia; o__Bacteroidales; f__Lentimicrobiaceae; g__Lentimicrobium; s__Lentimicrobium saccharophilum	yes	1678841	yes	yes	0.00026	yes
GCA_004217115.1	Ancylomarina subtilis	d__Bacteria; p__Bacteroidetes; c__Bacteroidia; o__Marinilabiliales; f__Marinifilaceae; g__Ancylomarina; s__Ancylomarina subtilis	d__Bacteria; p__Bacteroidota; c__Bacteroidia; o__Bacteroidales; f__Marinifilaceae; g__Ancylomarina; s__Ancylomarina subtilis	yes	1639035	yes	yes	4e-05	yes
GCA_003096835.1	Balneicella halophila	d__Bacteria; p__Bacteroidetes; c__Bacteroidia; o__Bacteroidales; f__Balneicellaceae; g__Balneicella; s__Balneicella halophila	d__Bacteria; p__Bacteroidota; c__Bacteroidia; o__Bacteroidales; f__Marinifilaceae; g__Balneicella; s__Balneicella halophila	yes	1537566	yes	no		no
GCA_003991565.1	Butyricimonas sp. H184	d__Bacteria; p__Bacteroidetes; c__Bacteroidia; o__Bacteroidales; f__Odoribacteraceae; g__Butyricimonas; s__Butyricimonas faecalis	d__Bacteria; p__Bacteroidota; c__Bacteroidia; o__Bacteroidales; f__Marinifilaceae; g__Butyricimonas; s__Butyricimonas faecalis	yes	2093856	yes	yes	0.00025	yes
GCA_000379665.1	Butyricimonas synergistica DSM 23225	d__Bacteria; p__Bacteroidetes; c__Bacteroidia; o__Bacteroidales; f__Odoribacteraceae; g__Butyricimonas; s__Butyricimonas synergistica	d__Bacteria; p__Bacteroidota; c__Bacteroidia; o__Bacteroidales; f__Marinifilaceae; g__Butyricimonas; s__Butyricimonas synergistica	no
GCA_000519105.1	Butyricimonas virosa DSM 23226	d__Bacteria; p__Bacteroidetes; c__Bacteroidia; o__Bacteroidales; f__Odoribacteraceae; g__Butyricimonas; s__Butyricimonas virosa	d__Bacteria; p__Bacteroidota; c__Bacteroidia; o__Bacteroidales; f__Marinifilaceae; g__Butyricimonas; s__Butyricimonas virosa	no
GCA_001487125.1	Gabonibacter massiliensis	d__Bacteria; p__Bacteroidetes; c__Bacteroidia; o__Bacteroidales; f__Porphyromonadaceae; g__Gabonibacter; s__Gabonibacter massiliensis	d__Bacteria; p__Bacteroidota; c__Bacteroidia; o__Bacteroidales; f__Marinifilaceae; g__Gabonibacter; s__Gabonibacter massiliensis	no
GCA_002843315.1	Labilibaculum filiforme	d__Bacteria; p__Bacteroidetes; c__Bacteroidia; o__Marinilabiliales; f__Marinifilaceae; g__Labilibaculum; s__Labilibaculum filiforme	d__Bacteria; p__Bacteroidota; c__Bacteroidia; o__Bacteroidales; f__Marinifilaceae; g__Labilibaculum; s__Labilibaculum filiforme	yes	1940526	yes	yes	6.9e-06	yes
GCA_002843385.1	Labilibaculum manganireducens	d__Bacteria; p__Bacteroidetes; c__Bacteroidia; o__Marinilabiliales; f__Marinifilaceae; g__Labilibaculum; s__Labilibaculum manganireducens	d__Bacteria; p__Bacteroidota; c__Bacteroidia; o__Bacteroidales; f__Marinifilaceae; g__Labilibaculum; s__Labilibaculum manganireducens	yes	1940525	yes	yes	7e-05	yes
GCA_003202155.1	Marinifilum breve	d__Bacteria; p__Bacteroidetes; c__Bacteroidia; o__Marinilabiliales; f__Marinifilaceae; g__Marinifilum; s__Marinifilum breve	d__Bacteria; p__Bacteroidota; c__Bacteroidia; o__Bacteroidales; f__Marinifilaceae; g__Marinifilum; s__Marinifilum breve	yes	2184082	yes	yes	2.4e-05	yes
GCA_003610555.1	Marinifilum flexuosum	d__Bacteria; p__Bacteroidetes; c__Bacteroidia; o__Marinilabiliales; f__Marinifilaceae; g__Marinifilum; s__Marinifilum flexuosum	d__Bacteria; p__Bacteroidota; c__Bacteroidia; o__Bacteroidales; f__Marinifilaceae; g__Marinifilum; s__Marinifilum flexuosum	yes	1117708	yes	yes	2.4e-05	yes
GCA_001310955.1	Marinifilum fragile JCM 15579	d__Bacteria; p__Bacteroidetes; c__Bacteroidia; o__Marinilabiliales; f__Marinifilaceae; g__Marinifilum; s__Marinifilum fragile	d__Bacteria; p__Bacteroidota; c__Bacteroidia; o__Bacteroidales; f__Marinifilaceae; g__Marinifilum; s__Marinifilum fragile	no
GCA_000243215.1	Odoribacter laneus YIT 12061	d__Bacteria; p__Bacteroidetes; c__Bacteroidia; o__Bacteroidales; f__Odoribacteraceae; g__Odoribacter; s__Odoribacter laneus	d__Bacteria; p__Bacteroidota; c__Bacteroidia; o__Bacteroidales; f__Marinifilaceae; g__Odoribacter; s__Odoribacter laneus	yes	742817	yes	yes	0.00019	yes
GCA_900091655.1	Culturomica massiliensis	d__Bacteria; p__Bacteroidetes; c__Bacteroidia; o__Bacteroidales; f__Odoribacteraceae; g__Culturomica; s__Culturomica massiliensis	d__Bacteria; p__Bacteroidota; c__Bacteroidia; o__Bacteroidales; f__Marinifilaceae; g__Odoribacter; s__Odoribacter massiliensis	no
GCA_000190535.1	Odoribacter splanchnicus DSM 20712	d__Bacteria; p__Bacteroidetes; c__Bacteroidia; o__Bacteroidales; f__Odoribacteraceae; g__Odoribacter; s__Odoribacter splanchnicus	d__Bacteria; p__Bacteroidota; c__Bacteroidia; o__Bacteroidales; f__Marinifilaceae; g__Odoribacter; s__Odoribacter splanchnicus	yes	709991	yes	yes	0.00047	yes
GCA_000517065.1	Alkaliflexus imshenetskii DSM 15055	d__Bacteria; p__Bacteroidetes; c__Bacteroidia; o__Marinilabiliales; f__Marinilabiliaceae; g__Alkaliflexus; s__Alkaliflexus imshenetskii	d__Bacteria; p__Bacteroidota; c__Bacteroidia; o__Bacteroidales; f__Marinilabiliaceae; g__Alkaliflexus; s__Alkaliflexus imshenetskii	no
GCA_000191885.1	Anaerophaga thermohalophila DSM 12881	d__Bacteria; p__Bacteroidetes; c__Bacteroidia; o__Marinilabiliales; f__Marinilabiliaceae; g__Anaerophaga; s__Anaerophaga thermohalophila	d__Bacteria; p__Bacteroidota; c__Bacteroidia; o__Bacteroidales; f__Marinilabiliaceae; g__Anaerophaga; s__Anaerophaga thermohalophila	no
GCA_003254275.1	Cytophaga xylanolytica	d__Bacteria; p__Bacteroidetes; c__Cytophagia; o__Cytophagales; f__Cytophagaceae; g__Cytophaga; s__Cytophaga xylanolytica	d__Bacteria; p__Bacteroidota; c__Bacteroidia; o__Bacteroidales; f__Marinilabiliaceae; g__Breznakibacter; s__Breznakibacter xylanolytica	yes	990	yes	yes	0.0012	yes
GCA_002210225.1	Geofilum rhodophaeum	d__Bacteria; p__Bacteroidetes; c__Bacteroidia; o__Marinilabiliales; f__Marinilabiliaceae; g__Geofilum; s__Geofilum rhodophaeum	d__Bacteria; p__Bacteroidota; c__Bacteroidia; o__Bacteroidales; f__Marinilabiliaceae; g__Geofilum; s__Geofilum rhodophaeum	no
GCA_000974365.1	Geofilum rubicundum JCM 15548	d__Bacteria; p__Bacteroidetes; c__Bacteroidia; o__Marinilabiliales; f__Marinilabiliaceae; g__Geofilum; s__Geofilum rubicundum	d__Bacteria; p__Bacteroidota; c__Bacteroidia; o__Bacteroidales; f__Marinilabiliaceae; g__Geofilum; s__Geofilum rubicundum	yes	1236989	yes	yes	0.0016	yes
GCA_001660705.2	Labilibacter aurantiacus	d__Bacteria; p__Bacteroidetes; c__Bacteroidia; o__Marinilabiliales; f__Marinilabiliaceae; g__Labilibacter; s__Labilibacter aurantiacus	d__Bacteria; p__Bacteroidota; c__Bacteroidia; o__Bacteroidales; f__Marinilabiliaceae; g__Labilibacter; s__Labilibacter aurantiacus	no
GCA_000259075.1	Marinilabilia salmonicolor JCM 21150	d__Bacteria; p__Bacteroidetes; c__Bacteroidia; o__Marinilabiliales; f__Marinilabiliaceae; g__Marinilabilia; s__Marinilabilia salmonicolor	d__Bacteria; p__Bacteroidota; c__Bacteroidia; o__Bacteroidales; f__Marinilabiliaceae; g__Marinilabilia; s__Marinilabilia salmonicolor	no
GCA_004345615.1	Natronoflexus pectinivorans	d__Bacteria; p__Bacteroidetes; c__Bacteroidia; o__Marinilabiliales; f__Marinilabiliaceae; g__Natronoflexus; s__Natronoflexus pectinivorans	d__Bacteria; p__Bacteroidota; c__Bacteroidia; o__Bacteroidales; f__Marinilabiliaceae; g__Natronoflexus; s__Natronoflexus pectinivorans	yes	682526	yes	yes	0.0093	yes
GCA_002201795.1	Alkalitalea saponilacus	d__Bacteria; p__Bacteroidetes; c__Bacteroidia; o__Marinilabiliales; f__Marinilabiliaceae; g__Alkalitalea; s__Alkalitalea saponilacus	d__Bacteria; p__Bacteroidota; c__Bacteroidia; o__Bacteroidales; f__Marinilabiliaceae; g__Natronoflexus; s__Natronoflexus saponilacus	yes	889453	yes	yes	0.0093	yes
GCA_900182605.1	Saccharicrinis carchari	d__Bacteria; p__Bacteroidetes; c__Bacteroidia; o__Marinilabiliales; f__Marinilabiliaceae; g__Saccharicrinis; s__Saccharicrinis carchari	d__Bacteria; p__Bacteroidota; c__Bacteroidia; o__Bacteroidales; f__Marinilabiliaceae; g__Saccharicrinis; s__Saccharicrinis carchari	yes	1168039	yes	yes	0.0021	yes
GCA_000517085.1	Saccharicrinis fermentans DSM 9555 = JCM 21142	d__Bacteria; p__Bacteroidetes; c__Bacteroidia; o__Marinilabiliales; f__Marinilabiliaceae; g__Saccharicrinis; s__Saccharicrinis fermentans	d__Bacteria; p__Bacteroidota; c__Bacteroidia; o__Bacteroidales; f__Marinilabiliaceae; g__Saccharicrinis; s__Saccharicrinis fermentans	no
GCA_001659685.2	Labilibacter marinus	d__Bacteria; p__Bacteroidetes; c__Bacteroidia; o__Marinilabiliales; f__Marinilabiliaceae; g__Labilibacter; s__Labilibacter marinus	d__Bacteria; p__Bacteroidota; c__Bacteroidia; o__Bacteroidales; f__Marinilabiliaceae; g__Saccharicrinis; s__Saccharicrinis marinus	no
GCA_900112795.1	Thermophagus xiamenensis	d__Bacteria; p__Bacteroidetes; c__Bacteroidia; o__Marinilabiliales; f__Marinilabiliaceae; g__Thermophagus; s__Thermophagus xiamenensis	d__Bacteria; p__Bacteroidota; c__Bacteroidia; o__Bacteroidales; f__Marinilabiliaceae; g__Thermophagus; s__Thermophagus xiamenensis	yes	385682	yes	yes	0.02	yes
GCA_003024805.1	Duncaniella muris	d__Bacteria; p__Bacteroidetes; c__Bacteroidia; o__Bacteroidales; f__Muribaculaceae; g__Duncaniella; s__Duncaniella muris	d__Bacteria; p__Bacteroidota; c__Bacteroidia; o__Bacteroidales; f__Muribaculaceae; g__Duncaniella; s__Duncaniella muris	yes	2094150	no
GCA_002201515.1	Muribaculum intestinale	d__Bacteria; p__Bacteroidetes; c__Bacteroidia; o__Bacteroidales; f__Muribaculaceae; g__Muribaculum; s__Muribaculum intestinale	d__Bacteria; p__Bacteroidota; c__Bacteroidia; o__Bacteroidales; f__Muribaculaceae; g__Muribaculum; s__Muribaculum intestinale	yes	1796646	yes	no		no
GCA_003024925.1	Paramuribaculum intestinale	d__Bacteria; p__Bacteroidetes; c__Bacteroidia; o__Bacteroidales; f__Muribaculaceae; g__Paramuribaculum; s__Paramuribaculum intestinale	d__Bacteria; p__Bacteroidota; c__Bacteroidia; o__Bacteroidales; f__Muribaculaceae; g__Paramuribaculum; s__Paramuribaculum intestinale	yes	2094151	yes	no		no
GCA_001618385.1	Paludibacter jiangxiensis	d__Bacteria; p__Bacteroidetes; c__Bacteroidia; o__Bacteroidales; f__Paludibacteraceae; g__Paludibacter; s__Paludibacter jiangxiensis	d__Bacteria; p__Bacteroidota; c__Bacteroidia; o__Bacteroidales; f__Paludibacteraceae; g__Paludibacter_A; s__Paludibacter_A jiangxiensis	yes	681398	yes	yes	0.0013	yes
GCA_000183135.1	Paludibacter propionicigenes WB4	d__Bacteria; p__Bacteroidetes; c__Bacteroidia; o__Bacteroidales; f__Paludibacteraceae; g__Paludibacter; s__Paludibacter propionicigenes	d__Bacteria; p__Bacteroidota; c__Bacteroidia; o__Bacteroidales; f__Paludibacteraceae; g__Paludibacter; s__Paludibacter propionicigenes	yes	694427	yes	yes	0.0064	yes
GCA_000375645.1	Porphyromonas bennonis DSM 23058 = JCM 16335	d__Bacteria; p__Bacteroidetes; c__Bacteroidia; o__Bacteroidales; f__Porphyromonadaceae; g__Porphyromonas; s__Porphyromonas bennonis	d__Bacteria; p__Bacteroidota; c__Bacteroidia; o__Bacteroidales; f__Porphyromonadaceae; g__Porphyromonas_A; s__Porphyromonas_A bennonis	no
GCA_900638305.1	Porphyromonas cangingivalis	d__Bacteria; p__Bacteroidetes; c__Bacteroidia; o__Bacteroidales; f__Porphyromonadaceae; g__Porphyromonas; s__Porphyromonas cangingivalis	d__Bacteria; p__Bacteroidota; c__Bacteroidia; o__Bacteroidales; f__Porphyromonadaceae; g__Porphyromonas_A; s__Porphyromonas_A cangingivalis	yes	36874	yes	yes	0.0015	yes
GCA_000379925.1	Porphyromonas levii DSM 23370	d__Bacteria; p__Bacteroidetes; c__Bacteroidia; o__Bacteroidales; f__Porphyromonadaceae; g__Porphyromonas; s__Porphyromonas levii	d__Bacteria; p__Bacteroidota; c__Bacteroidia; o__Bacteroidales; f__Porphyromonadaceae; g__Porphyromonas_A; s__Porphyromonas_A levii	no
GCA_000372405.1	Porphyromonas somerae DSM 23386	d__Bacteria; p__Bacteroidetes; c__Bacteroidia; o__Bacteroidales; f__Porphyromonadaceae; g__Porphyromonas; s__Porphyromonas somerae	d__Bacteria; p__Bacteroidota; c__Bacteroidia; o__Bacteroidales; f__Porphyromonadaceae; g__Porphyromonas_A; s__Porphyromonas_A somerae	no
GCA_000212375.1	Porphyromonas asaccharolytica DSM 20707	d__Bacteria; p__Bacteroidetes; c__Bacteroidia; o__Bacteroidales; f__Porphyromonadaceae; g__Porphyromonas; s__Porphyromonas asaccharolytica	d__Bacteria; p__Bacteroidota; c__Bacteroidia; o__Bacteroidales; f__Porphyromonadaceae; g__Porphyromonas; s__Porphyromonas asaccharolytica	yes	879243	yes	yes	0.00059	yes
GCA_000565015.1	Porphyromonas catoniae ATCC 51270	d__Bacteria; p__Bacteroidetes; c__Bacteroidia; o__Bacteroidales; f__Porphyromonadaceae; g__Porphyromonas; s__Porphyromonas catoniae	d__Bacteria; p__Bacteroidota; c__Bacteroidia; o__Bacteroidales; f__Porphyromonadaceae; g__Porphyromonas; s__Porphyromonas catoniae	yes	887901	yes	yes	0.0069	yes
GCA_900167105.1	Porphyromonas circumdentaria	d__Bacteria; p__Bacteroidetes; c__Bacteroidia; o__Bacteroidales; f__Porphyromonadaceae; g__Porphyromonas; s__Porphyromonas circumdentaria	d__Bacteria; p__Bacteroidota; c__Bacteroidia; o__Bacteroidales; f__Porphyromonadaceae; g__Porphyromonas; s__Porphyromonas circumdentaria	yes	29524	yes	yes	7.2e-05	yes
GCA_900167225.1	Porphyromonas crevioricanis	d__Bacteria; p__Bacteroidetes; c__Bacteroidia; o__Bacteroidales; f__Porphyromonadaceae; g__Porphyromonas; s__Porphyromonas crevioricanis	d__Bacteria; p__Bacteroidota; c__Bacteroidia; o__Bacteroidales; f__Porphyromonadaceae; g__Porphyromonas; s__Porphyromonas crevioricanis	yes	393921	yes	yes	0.0028	yes
GCA_000174815.1	Porphyromonas endodontalis ATCC 35406	d__Bacteria; p__Bacteroidetes; c__Bacteroidia; o__Bacteroidales; f__Porphyromonadaceae; g__Porphyromonas; s__Porphyromonas endodontalis	d__Bacteria; p__Bacteroidota; c__Bacteroidia; o__Bacteroidales; f__Porphyromonadaceae; g__Porphyromonas; s__Porphyromonas endodontalis	yes	553175	yes	yes	0.0015	yes
GCA_000010505.1	Porphyromonas gingivalis ATCC 33277	d__Bacteria; p__Bacteroidetes; c__Bacteroidia; o__Bacteroidales; f__Porphyromonadaceae; g__Porphyromonas; s__Porphyromonas gingivalis	d__Bacteria; p__Bacteroidota; c__Bacteroidia; o__Bacteroidales; f__Porphyromonadaceae; g__Porphyromonas; s__Porphyromonas gingivalis	yes	431947	yes	yes	0.0016	yes
GCA_000614585.1	Porphyromonas gingivicanis JCM 15907	d__Bacteria; p__Bacteroidetes; c__Bacteroidia; o__Bacteroidales; f__Porphyromonadaceae; g__Porphyromonas; s__Porphyromonas gingivicanis	d__Bacteria; p__Bacteroidota; c__Bacteroidia; o__Bacteroidales; f__Porphyromonadaceae; g__Porphyromonas; s__Porphyromonas gingivicanis	no
GCA_000378065.1	Porphyromonas gulae DSM 15663	d__Bacteria; p__Bacteroidetes; c__Bacteroidia; o__Bacteroidales; f__Porphyromonadaceae; g__Porphyromonas; s__Porphyromonas gulae	d__Bacteria; p__Bacteroidota; c__Bacteroidia; o__Bacteroidales; f__Porphyromonadaceae; g__Porphyromonas; s__Porphyromonas gulae	no
GCA_003096695.1	Porphyromonas loveana	d__Bacteria; p__Bacteroidetes; c__Bacteroidia; o__Bacteroidales; f__Porphyromonadaceae; g__Porphyromonas; s__Porphyromonas loveana	d__Bacteria; p__Bacteroidota; c__Bacteroidia; o__Bacteroidales; f__Porphyromonadaceae; g__Porphyromonas; s__Porphyromonas loveana	yes	1884669	yes	yes	0.0009	yes
GCA_000379945.1	Porphyromonas macacae DSM 20710 = JCM 13914	d__Bacteria; p__Bacteroidetes; c__Bacteroidia; o__Bacteroidales; f__Porphyromonadaceae; g__Porphyromonas; s__Porphyromonas macacae	d__Bacteria; p__Bacteroidota; c__Bacteroidia; o__Bacteroidales; f__Porphyromonadaceae; g__Porphyromonas; s__Porphyromonas macacae	no
GCA_000482365.1	Porphyromonas uenonis DSM 23387 = JCM 13868	d__Bacteria; p__Bacteroidetes; c__Bacteroidia; o__Bacteroidales; f__Porphyromonadaceae; g__Porphyromonas; s__Porphyromonas uenonis	d__Bacteria; p__Bacteroidota; c__Bacteroidia; o__Bacteroidales; f__Porphyromonadaceae; g__Porphyromonas; s__Porphyromonas uenonis	no
GCA_000626635.1	Draconibacterium orientale	d__Bacteria; p__Bacteroidetes; c__Bacteroidia; o__Marinilabiliales; f__Prolixibacteraceae; g__Draconibacterium; s__Draconibacterium orientale	d__Bacteria; p__Bacteroidota; c__Bacteroidia; o__Bacteroidales; f__Prolixibacteraceae; g__Draconibacterium; s__Draconibacterium orientale	yes	1168034	yes	yes	5.9e-05	yes
GCA_000949475.1	Draconibacterium sediminis	d__Bacteria; p__Bacteroidetes; c__Bacteroidia; o__Marinilabiliales; f__Prolixibacteraceae; g__Draconibacterium; s__Draconibacterium sediminis	d__Bacteria; p__Bacteroidota; c__Bacteroidia; o__Bacteroidales; f__Prolixibacteraceae; g__Draconibacterium; s__Draconibacterium sediminis	yes	1544798	yes	yes	0.00021	yes
GCA_003610535.1	Mangrovibacterium diazotrophicum	d__Bacteria; p__Bacteroidetes; c__Bacteroidia; o__Marinilabiliales; f__Prolixibacteraceae; g__Mangrovibacterium; s__Mangrovibacterium diazotrophicum	d__Bacteria; p__Bacteroidota; c__Bacteroidia; o__Bacteroidales; f__Prolixibacteraceae; g__Mangrovibacterium; s__Mangrovibacterium diazotrophicum	yes	1261403	yes	yes	5.4e-05	yes
GCA_003046625.1	Mangrovibacterium marinum	d__Bacteria; p__Bacteroidetes; c__Bacteroidia; o__Marinilabiliales; f__Prolixibacteraceae; g__Mangrovibacterium; s__Mangrovibacterium marinum	d__Bacteria; p__Bacteroidota; c__Bacteroidia; o__Bacteroidales; f__Prolixibacteraceae; g__Mangrovibacterium; s__Mangrovibacterium marinum	yes	1639118	yes	yes	5.4e-05	yes
GCA_900129025.1	Mariniphaga anaerophila	d__Bacteria; p__Bacteroidetes; c__Bacteroidia; o__Marinilabiliales; f__Prolixibacteraceae; g__Mariniphaga; s__Mariniphaga anaerophila	d__Bacteria; p__Bacteroidota; c__Bacteroidia; o__Bacteroidales; f__Prolixibacteraceae; g__Mariniphaga; s__Mariniphaga anaerophila	yes	1484053	yes	yes	0.00017	yes
GCA_003573545.1	Mariniphaga sediminis	d__Bacteria; p__Bacteroidetes; c__Bacteroidia; o__Marinilabiliales; f__Prolixibacteraceae; g__Mariniphaga; s__Mariniphaga sediminis	d__Bacteria; p__Bacteroidota; c__Bacteroidia; o__Bacteroidales; f__Prolixibacteraceae; g__Mariniphaga; s__Mariniphaga sediminis	yes	1628158	yes	yes	9.5e-05	yes
GCA_000621705.1	Prolixibacter bellariivorans ATCC BAA-1284	d__Bacteria; p__Bacteroidetes; c__Bacteroidia; o__Marinilabiliales; f__Prolixibacteraceae; g__Prolixibacter; s__Prolixibacter bellariivorans	d__Bacteria; p__Bacteroidota; c__Bacteroidia; o__Bacteroidales; f__Prolixibacteraceae; g__Prolixibacter; s__Prolixibacter bellariivorans	no
GCA_003014495.1	Prolixibacter denitrificans	d__Bacteria; p__Bacteroidetes; c__Bacteroidia; o__Marinilabiliales; f__Prolixibacteraceae; g__Prolixibacter; s__Prolixibacter denitrificans	d__Bacteria; p__Bacteroidota; c__Bacteroidia; o__Bacteroidales; f__Prolixibacteraceae; g__Prolixibacter; s__Prolixibacter denitrificans	yes	1541063	no
GCA_001270965.1	Sunxiuqinia dokdonensis	d__Bacteria; p__Bacteroidetes; c__Bacteroidia; o__Marinilabiliales; f__Prolixibacteraceae; g__Sunxiuqinia; s__Sunxiuqinia dokdonensis	d__Bacteria; p__Bacteroidota; c__Bacteroidia; o__Bacteroidales; f__Prolixibacteraceae; g__Sunxiuqinia; s__Sunxiuqinia dokdonensis	yes	1409788	yes	yes	3.5e-05	yes
GCA_900113005.1	Sunxiuqinia elliptica	d__Bacteria; p__Bacteroidetes; c__Bacteroidia; o__Marinilabiliales; f__Prolixibacteraceae; g__Sunxiuqinia; s__Sunxiuqinia elliptica	d__Bacteria; p__Bacteroidota; c__Bacteroidia; o__Bacteroidales; f__Prolixibacteraceae; g__Sunxiuqinia; s__Sunxiuqinia elliptica	yes	655355	yes	yes	0.00037	yes
GCA_900141875.1	Tangfeifania diversioriginum	d__Bacteria; p__Bacteroidetes; c__Bacteroidia; o__Marinilabiliales; f__Prolixibacteraceae; g__Tangfeifania; s__Tangfeifania diversioriginum	d__Bacteria; p__Bacteroidota; c__Bacteroidia; o__Bacteroidales; f__Prolixibacteraceae; g__Tangfeifania; s__Tangfeifania diversioriginum	yes	1168035	yes	yes	0.00035	yes
GCA_000321205.1	Alistipes ihumii AP11	d__Bacteria; p__Bacteroidetes; c__Bacteroidia; o__Bacteroidales; f__Rikenellaceae; g__Alistipes; s__Alistipes ihumii	d__Bacteria; p__Bacteroidota; c__Bacteroidia; o__Bacteroidales; f__Rikenellaceae; g__Alistipes_A; s__Alistipes_A ihumii	no
GCA_000231275.1	Alistipes indistinctus YIT 12060	d__Bacteria; p__Bacteroidetes; c__Bacteroidia; o__Bacteroidales; f__Rikenellaceae; g__Alistipes; s__Alistipes indistinctus	d__Bacteria; p__Bacteroidota; c__Bacteroidia; o__Bacteroidales; f__Rikenellaceae; g__Alistipes_A; s__Alistipes_A indistinctus	yes	742725	yes	no		no
GCA_000265365.1	Alistipes finegoldii DSM 17242	d__Bacteria; p__Bacteroidetes; c__Bacteroidia; o__Bacteroidales; f__Rikenellaceae; g__Alistipes; s__Alistipes finegoldii	d__Bacteria; p__Bacteroidota; c__Bacteroidia; o__Bacteroidales; f__Rikenellaceae; g__Alistipes; s__Alistipes finegoldii	yes	679935	yes	no		no
GCA_000311925.1	Alistipes obesi	d__Bacteria; p__Bacteroidetes; c__Bacteroidia; o__Bacteroidales; f__Rikenellaceae; g__Alistipes; s__Alistipes obesi	d__Bacteria; p__Bacteroidota; c__Bacteroidia; o__Bacteroidales; f__Rikenellaceae; g__Alistipes; s__Alistipes obesi	no
GCA_000374505.1	Alistipes onderdonkii WAL 8169 = DSM 19147	d__Bacteria; p__Bacteroidetes; c__Bacteroidia; o__Bacteroidales; f__Rikenellaceae; g__Alistipes; s__Alistipes onderdonkii	d__Bacteria; p__Bacteroidota; c__Bacteroidia; o__Bacteroidales; f__Rikenellaceae; g__Alistipes; s__Alistipes onderdonkii	no
GCA_000154465.1	Alistipes putredinis DSM 17216	d__Bacteria; p__Bacteroidetes; c__Bacteroidia; o__Bacteroidales; f__Rikenellaceae; g__Alistipes; s__Alistipes putredinis	d__Bacteria; p__Bacteroidota; c__Bacteroidia; o__Bacteroidales; f__Rikenellaceae; g__Alistipes; s__Alistipes putredinis	yes	445970	yes	yes	0.04	yes
GCA_000312145.1	Alistipes senegalensis JC50	d__Bacteria; p__Bacteroidetes; c__Bacteroidia; o__Bacteroidales; f__Rikenellaceae; g__Alistipes; s__Alistipes senegalensis	d__Bacteria; p__Bacteroidota; c__Bacteroidia; o__Bacteroidales; f__Rikenellaceae; g__Alistipes; s__Alistipes senegalensis	no
GCA_000210575.1	Alistipes shahii WAL 8301	d__Bacteria; p__Bacteroidetes; c__Bacteroidia; o__Bacteroidales; f__Rikenellaceae; g__Alistipes; s__Alistipes shahii	d__Bacteria; p__Bacteroidota; c__Bacteroidia; o__Bacteroidales; f__Rikenellaceae; g__Alistipes; s__Alistipes shahii	yes	717959	yes	no		no
GCA_900107675.1	Alistipes timonensis JC136	d__Bacteria; p__Bacteroidetes; c__Bacteroidia; o__Bacteroidales; f__Rikenellaceae; g__Alistipes; s__Alistipes timonensis	d__Bacteria; p__Bacteroidota; c__Bacteroidia; o__Bacteroidales; f__Rikenellaceae; g__Alistipes; s__Alistipes timonensis	yes	1033731	yes	no		no
GCA_900104655.1	Millionella massiliensis	d__Bacteria; p__Bacteroidetes; c__Bacteroidia; o__Bacteroidales; f__Rikenellaceae; g__Millionella; s__Millionella massiliensis	d__Bacteria; p__Bacteroidota; c__Bacteroidia; o__Bacteroidales; f__Rikenellaceae; g__Rikenella; s__Rikenella massiliensis	no
GCA_000427365.1	Rikenella microfusus DSM 15922	d__Bacteria; p__Bacteroidetes; c__Bacteroidia; o__Bacteroidales; f__Rikenellaceae; g__Rikenella; s__Rikenella microfusus	d__Bacteria; p__Bacteroidota; c__Bacteroidia; o__Bacteroidales; f__Rikenellaceae; g__Rikenella; s__Rikenella microfusus	no
GCA_000786575.1	Alistipes inops	d__Bacteria; p__Bacteroidetes; c__Bacteroidia; o__Bacteroidales; f__Rikenellaceae; g__Alistipes; s__Alistipes inops	d__Bacteria; p__Bacteroidota; c__Bacteroidia; o__Bacteroidales; f__Rikenellaceae; g__Tidjanibacter; s__Tidjanibacter inops	yes	1501391	yes	no		no
GCA_001443605.1	Salinivirga cyanobacteriivorans	d__Bacteria; p__Bacteroidetes; c__Bacteroidia; o__Marinilabiliales; f__Salinivirgaceae; g__Salinivirga; s__Salinivirga cyanobacteriivorans	d__Bacteria; p__Bacteroidota; c__Bacteroidia; o__Bacteroidales; f__Salinivirgaceae; g__Salinivirga; s__Salinivirga cyanobacteriivorans	yes	1307839	yes	yes	0.00033	yes
GCA_900178525.1	Massilibacteroides vaginae	d__Bacteria; p__Bacteroidetes; c__Bacteroidia; o__Bacteroidales; f__Porphyromonadaceae; g__Massilibacteroides; s__Massilibacteroides vaginae	d__Bacteria; p__Bacteroidota; c__Bacteroidia; o__Bacteroidales; f__Tannerellaceae; g__Massilibacteroides; s__Massilibacteroides vaginae	no
GCA_900168155.1	Parabacteroides chartae	d__Bacteria; p__Bacteroidetes; c__Bacteroidia; o__Bacteroidales; f__Tannerellaceae; g__Parabacteroides; s__Parabacteroides chartae	d__Bacteria; p__Bacteroidota; c__Bacteroidia; o__Bacteroidales; f__Tannerellaceae; g__Parabacteroides_A; s__Parabacteroides_A chartae	yes	1037355	yes	yes	0.023	yes
GCA_003363715.1	Parabacteroides sp. 426-9	d__Bacteria; p__Bacteroidetes; c__Bacteroidia; o__Bacteroidales; f__Tannerellaceae; g__Parabacteroides; s__Parabacteroides acidifaciens	d__Bacteria; p__Bacteroidota; c__Bacteroidia; o__Bacteroidales; f__Tannerellaceae; g__Parabacteroides; s__Parabacteroides acidifaciens	yes	2290935	yes	yes	0.0036	yes
GCA_900186615.1	Parabacteroides bouchesdurhonensis	d__Bacteria; p__Bacteroidetes; c__Bacteroidia; o__Bacteroidales; f__Tannerellaceae; g__Parabacteroides; s__Parabacteroides bouchesdurhonensis	d__Bacteria; p__Bacteroidota; c__Bacteroidia; o__Bacteroidales; f__Tannerellaceae; g__Parabacteroides; s__Parabacteroides bouchesdurhonensis	no
GCA_900108035.1	Parabacteroides chinchillae	d__Bacteria; p__Bacteroidetes; c__Bacteroidia; o__Bacteroidales; f__Tannerellaceae; g__Parabacteroides; s__Parabacteroides chinchillae	d__Bacteria; p__Bacteroidota; c__Bacteroidia; o__Bacteroidales; f__Tannerellaceae; g__Parabacteroides; s__Parabacteroides chinchillae	yes	871327	yes	yes	0.0024	yes
GCA_000012845.1	Parabacteroides distasonis ATCC 8503	d__Bacteria; p__Bacteroidetes; c__Bacteroidia; o__Bacteroidales; f__Tannerellaceae; g__Parabacteroides; s__Parabacteroides distasonis	d__Bacteria; p__Bacteroidota; c__Bacteroidia; o__Bacteroidales; f__Tannerellaceae; g__Parabacteroides; s__Parabacteroides distasonis	yes	435591	yes	yes	0.0063	yes
GCA_000969835.1	Parabacteroides goldsteinii DSM 19448 = WAL 12034	d__Bacteria; p__Bacteroidetes; c__Bacteroidia; o__Bacteroidales; f__Tannerellaceae; g__Parabacteroides; s__Parabacteroides goldsteinii	d__Bacteria; p__Bacteroidota; c__Bacteroidia; o__Bacteroidales; f__Tannerellaceae; g__Parabacteroides; s__Parabacteroides goldsteinii	yes	927665	yes	yes	0.0045	yes
GCA_000969825.1	Parabacteroides gordonii MS-1	d__Bacteria; p__Bacteroidetes; c__Bacteroidia; o__Bacteroidales; f__Tannerellaceae; g__Parabacteroides; s__Parabacteroides gordonii	d__Bacteria; p__Bacteroidota; c__Bacteroidia; o__Bacteroidales; f__Tannerellaceae; g__Parabacteroides; s__Parabacteroides gordonii	yes	1203610	yes	yes	0.011	yes
GCA_000156495.1	Parabacteroides johnsonii DSM 18315	d__Bacteria; p__Bacteroidetes; c__Bacteroidia; o__Bacteroidales; f__Tannerellaceae; g__Parabacteroides; s__Parabacteroides johnsonii	d__Bacteria; p__Bacteroidota; c__Bacteroidia; o__Bacteroidales; f__Tannerellaceae; g__Parabacteroides; s__Parabacteroides johnsonii	yes	537006	yes	yes	0.0029	yes
GCA_000154105.1	Parabacteroides merdae ATCC 43184	d__Bacteria; p__Bacteroidetes; c__Bacteroidia; o__Bacteroidales; f__Tannerellaceae; g__Parabacteroides; s__Parabacteroides merdae	d__Bacteria; p__Bacteroidota; c__Bacteroidia; o__Bacteroidales; f__Tannerellaceae; g__Parabacteroides; s__Parabacteroides merdae	yes	411477	yes	yes	0.0029	yes
GCA_900128505.1	Parabacteroides timonensis	d__Bacteria; p__Bacteroidetes; c__Bacteroidia; o__Bacteroidales; f__Tannerellaceae; g__Parabacteroides; s__Parabacteroides timonensis	d__Bacteria; p__Bacteroidota; c__Bacteroidia; o__Bacteroidales; f__Tannerellaceae; g__Parabacteroides; s__Parabacteroides timonensis	no
GCA_001006485.1	Tannerella forsythia	d__Bacteria; p__Bacteroidetes; c__Bacteroidia; o__Bacteroidales; f__Tannerellaceae; g__Tannerella; s__Tannerella forsythia	d__Bacteria; p__Bacteroidota; c__Bacteroidia; o__Bacteroidales; f__Tannerellaceae; g__Tannerella; s__Tannerella forsythia	yes	28112	yes	yes	0.00042	yes
GCA_900096565.1	Williamwhitmania taraxaci	d__Bacteria; p__Bacteroidetes; c__Bacteroidia; o__Bacteroidales; f__Williamwhitmaniaceae; g__Williamwhitmania; s__Williamwhitmania taraxaci	d__Bacteria; p__Bacteroidota; c__Bacteroidia; o__Bacteroidales; f__Williamwhitmaniaceae; g__Williamwhitmania; s__Williamwhitmania taraxaci	yes	1640674	yes	yes	0.007	yes
GCA_004340205.1	Acetobacteroides hydrogenigenes	d__Bacteria; p__Bacteroidetes; c__Bacteroidia; o__Bacteroidales; f__Rikenellaceae; g__Acetobacteroides; s__Acetobacteroides hydrogenigenes	d__Bacteria; p__Bacteroidota; c__Bacteroidia; o__Bacteroidales; f__ZOR0009; g__Acetobacteroides; s__Acetobacteroides hydrogenigenes	yes	979970	yes	yes	0.0019	yes
GCA_900107765.1	Arachidicoccus rhizosphaerae	d__Bacteria; p__Bacteroidetes; c__Chitinophagia; o__Chitinophagales; f__Chitinophagaceae; g__Arachidicoccus; s__Arachidicoccus rhizosphaerae	d__Bacteria; p__Bacteroidota; c__Bacteroidia; o__Chitinophagales; f__Chitinophagaceae; g__Arachidicoccus; s__Arachidicoccus rhizosphaerae	yes	551991	yes	yes	0.0037	yes
GCA_900110835.1	Chitinophaga arvensicola	d__Bacteria; p__Bacteroidetes; c__Chitinophagia; o__Chitinophagales; f__Chitinophagaceae; g__Chitinophaga; s__Chitinophaga arvensicola	d__Bacteria; p__Bacteroidota; c__Bacteroidia; o__Chitinophagales; f__Chitinophagaceae; g__Chitinophaga; s__Chitinophaga arvensicola	yes	29529	yes	yes	0.013	yes
GCA_003807585.1	Chitinophaga barathri	d__Bacteria; p__Bacteroidetes; c__Chitinophagia; o__Chitinophagales; f__Chitinophagaceae; g__Chitinophaga; s__Chitinophaga barathri	d__Bacteria; p__Bacteroidota; c__Bacteroidia; o__Chitinophagales; f__Chitinophagaceae; g__Chitinophaga; s__Chitinophaga barathri	yes	1647451	yes	yes	0.031	yes
GCA_002557795.1	Chitinophaga caeni	d__Bacteria; p__Bacteroidetes; c__Chitinophagia; o__Chitinophagales; f__Chitinophagaceae; g__Chitinophaga; s__Chitinophaga caeni	d__Bacteria; p__Bacteroidota; c__Bacteroidia; o__Chitinophagales; f__Chitinophagaceae; g__Chitinophaga; s__Chitinophaga caeni	yes	2029983	yes	yes	0.031	yes
GCA_900094705.1	Chitinophaga costaii	d__Bacteria; p__Bacteroidetes; c__Chitinophagia; o__Chitinophagales; f__Chitinophagaceae; g__Chitinophaga; s__Chitinophaga costaii	d__Bacteria; p__Bacteroidota; c__Bacteroidia; o__Chitinophagales; f__Chitinophagaceae; g__Chitinophaga; s__Chitinophaga costaii	yes	1335309	yes	yes	0.023	yes
GCA_003259435.1	Chitinophaga dinghuensis	d__Bacteria; p__Bacteroidetes; c__Chitinophagia; o__Chitinophagales; f__Chitinophagaceae; g__Chitinophaga; s__Chitinophaga dinghuensis	d__Bacteria; p__Bacteroidota; c__Bacteroidia; o__Chitinophagales; f__Chitinophagaceae; g__Chitinophaga; s__Chitinophaga dinghuensis	yes	1539050	yes	yes	0.022	yes
GCA_900167135.1	Chitinophaga eiseniae	d__Bacteria; p__Bacteroidetes; c__Chitinophagia; o__Chitinophagales; f__Chitinophagaceae; g__Chitinophaga; s__Chitinophaga eiseniae	d__Bacteria; p__Bacteroidota; c__Bacteroidia; o__Chitinophagales; f__Chitinophagaceae; g__Chitinophaga; s__Chitinophaga eiseniae	yes	634771	yes	yes	0.013	yes
GCA_900102545.1	Chitinophaga filiformis	d__Bacteria; p__Bacteroidetes; c__Chitinophagia; o__Chitinophagales; f__Chitinophagaceae; g__Chitinophaga; s__Chitinophaga filiformis	d__Bacteria; p__Bacteroidota; c__Bacteroidia; o__Chitinophagales; f__Chitinophagaceae; g__Chitinophaga; s__Chitinophaga filiformis	yes	104663	yes	yes	0.022	yes
GCA_900168065.1	Chitinophaga ginsengisegetis	d__Bacteria; p__Bacteroidetes; c__Chitinophagia; o__Chitinophagales; f__Chitinophagaceae; g__Chitinophaga; s__Chitinophaga ginsengisegetis	d__Bacteria; p__Bacteroidota; c__Bacteroidia; o__Chitinophagales; f__Chitinophagaceae; g__Chitinophaga; s__Chitinophaga ginsengisegetis	yes	393003	yes	yes	0.013	yes
GCA_003014595.1	Chitinophaga ginsengisoli	d__Bacteria; p__Bacteroidetes; c__Chitinophagia; o__Chitinophagales; f__Chitinophagaceae; g__Chitinophaga; s__Chitinophaga ginsengisoli	d__Bacteria; p__Bacteroidota; c__Bacteroidia; o__Chitinophagales; f__Chitinophagaceae; g__Chitinophaga; s__Chitinophaga ginsengisoli	yes	363837	yes	yes	0.022	yes
GCA_900142605.1	Chitinophaga jiangningensis	d__Bacteria; p__Bacteroidetes; c__Chitinophagia; o__Chitinophagales; f__Chitinophagaceae; g__Chitinophaga; s__Chitinophaga jiangningensis	d__Bacteria; p__Bacteroidota; c__Bacteroidia; o__Chitinophagales; f__Chitinophagaceae; g__Chitinophaga; s__Chitinophaga jiangningensis	yes	1419482	yes	yes	0.022	yes
GCA_900129465.1	Chitinophaga niabensis	d__Bacteria; p__Bacteroidetes; c__Chitinophagia; o__Chitinophagales; f__Chitinophagaceae; g__Chitinophaga; s__Chitinophaga niabensis	d__Bacteria; p__Bacteroidota; c__Bacteroidia; o__Chitinophagales; f__Chitinophagaceae; g__Chitinophaga; s__Chitinophaga niabensis	yes	536979	yes	yes	0.027	yes
GCA_003014755.1	Chitinophaga niastensis	d__Bacteria; p__Bacteroidetes; c__Chitinophagia; o__Chitinophagales; f__Chitinophagaceae; g__Chitinophaga; s__Chitinophaga niastensis	d__Bacteria; p__Bacteroidota; c__Bacteroidia; o__Chitinophagales; f__Chitinophagaceae; g__Chitinophaga; s__Chitinophaga niastensis	yes	536980	yes	yes	0.013	yes
GCA_003071345.1	Chitinophaga parva	d__Bacteria; p__Bacteroidetes; c__Chitinophagia; o__Chitinophagales; f__Chitinophagaceae; g__Chitinophaga; s__Chitinophaga parva	d__Bacteria; p__Bacteroidota; c__Bacteroidia; o__Chitinophagales; f__Chitinophagaceae; g__Chitinophaga; s__Chitinophaga parva	yes	2169414	yes	yes	0.017	yes
GCA_000024005.1	Chitinophaga pinensis DSM 2588	d__Bacteria; p__Bacteroidetes; c__Chitinophagia; o__Chitinophagales; f__Chitinophagaceae; g__Chitinophaga; s__Chitinophaga pinensis	d__Bacteria; p__Bacteroidota; c__Bacteroidia; o__Chitinophagales; f__Chitinophagaceae; g__Chitinophaga; s__Chitinophaga pinensis	yes	485918	yes	yes	0.043	yes
GCA_003958645.1	Chitinophaga rhizosphaerae	d__Bacteria; p__Bacteroidetes; c__Chitinophagia; o__Chitinophagales; f__Chitinophagaceae; g__Chitinophaga; s__Chitinophaga rhizosphaerae	d__Bacteria; p__Bacteroidota; c__Bacteroidia; o__Chitinophagales; f__Chitinophagaceae; g__Chitinophaga; s__Chitinophaga rhizosphaerae	no
GCA_900109685.1	Chitinophaga rupis	d__Bacteria; p__Bacteroidetes; c__Chitinophagia; o__Chitinophagales; f__Chitinophagaceae; g__Chitinophaga; s__Chitinophaga rupis	d__Bacteria; p__Bacteroidota; c__Bacteroidia; o__Chitinophagales; f__Chitinophagaceae; g__Chitinophaga; s__Chitinophaga rupis	yes	573321	yes	yes	0.04	yes
GCA_900119105.1	Chitinophaga sancti	d__Bacteria; p__Bacteroidetes; c__Chitinophagia; o__Chitinophagales; f__Chitinophagaceae; g__Chitinophaga; s__Chitinophaga sancti	d__Bacteria; p__Bacteroidota; c__Bacteroidia; o__Chitinophagales; f__Chitinophagaceae; g__Chitinophaga; s__Chitinophaga sancti	yes	1004	yes	yes	0.042	yes
GCA_003259335.1	Chitinophaga skermanii	d__Bacteria; p__Bacteroidetes; c__Chitinophagia; o__Chitinophagales; f__Chitinophagaceae; g__Chitinophaga; s__Chitinophaga skermanii	d__Bacteria; p__Bacteroidota; c__Bacteroidia; o__Chitinophagales; f__Chitinophagaceae; g__Chitinophaga; s__Chitinophaga skermanii	yes	331697	yes	yes	0.045	yes
GCA_900107795.1	Chitinophaga terrae Kim and Jung 2007	d__Bacteria; p__Bacteroidetes; c__Chitinophagia; o__Chitinophagales; f__Chitinophagaceae; g__Chitinophaga; s__Chitinophaga terrae	d__Bacteria; p__Bacteroidota; c__Bacteroidia; o__Chitinophagales; f__Chitinophagaceae; g__Chitinophaga; s__Chitinophaga terrae	yes	408074	yes	no		no
GCA_001953305.1	Cnuella takakiae	d__Bacteria; p__Bacteroidetes; c__Chitinophagia; o__Chitinophagales; f__Chitinophagaceae; g__Cnuella; s__Cnuella takakiae	d__Bacteria; p__Bacteroidota; c__Bacteroidia; o__Chitinophagales; f__Chitinophagaceae; g__Cnuella; s__Cnuella takakiae	yes	1302690	yes	yes	0.0015	yes
GCA_004366355.1	Dinghuibacter silviterrae	d__Bacteria; p__Bacteroidetes; c__Chitinophagia; o__Chitinophagales; f__Chitinophagaceae; g__Dinghuibacter; s__Dinghuibacter silviterrae	d__Bacteria; p__Bacteroidota; c__Bacteroidia; o__Chitinophagales; f__Chitinophagaceae; g__Dinghuibacter; s__Dinghuibacter silviterrae	yes	1539049	yes	yes	0.0027	yes
GCA_002355595.1	Filimonas lacunae	d__Bacteria; p__Bacteroidetes; c__Chitinophagia; o__Chitinophagales; f__Chitinophagaceae; g__Filimonas; s__Filimonas lacunae	d__Bacteria; p__Bacteroidota; c__Bacteroidia; o__Chitinophagales; f__Chitinophagaceae; g__Filimonas; s__Filimonas lacunae	no
GCA_000974785.1	Flavihumibacter petaseus NBRC 106054	d__Bacteria; p__Bacteroidetes; c__Chitinophagia; o__Chitinophagales; f__Chitinophagaceae; g__Flavihumibacter; s__Flavihumibacter petaseus	d__Bacteria; p__Bacteroidota; c__Bacteroidia; o__Chitinophagales; f__Chitinophagaceae; g__Flavihumibacter; s__Flavihumibacter petaseus	yes	1220578	yes	yes	0.00055	yes
GCA_000814475.1	Flavihumibacter solisilvae	d__Bacteria; p__Bacteroidetes; c__Chitinophagia; o__Chitinophagales; f__Chitinophagaceae; g__Flavihumibacter; s__Flavihumibacter solisilvae	d__Bacteria; p__Bacteroidota; c__Bacteroidia; o__Chitinophagales; f__Chitinophagaceae; g__Flavihumibacter; s__Flavihumibacter solisilvae	yes	1349421	yes	yes	5.2e-05	yes
GCA_002954265.1	Flavipsychrobacter stenotrophus	d__Bacteria; p__Bacteroidetes; c__Chitinophagia; o__Chitinophagales; f__Chitinophagaceae; g__Flavipsychrobacter; s__Flavipsychrobacter stenotrophus	d__Bacteria; p__Bacteroidota; c__Bacteroidia; o__Chitinophagales; f__Chitinophagaceae; g__Flavipsychrobacter; s__Flavipsychrobacter stenotrophus	yes	2077091	yes	no		no
GCA_001644645.1	Flavisolibacter tropicus	d__Bacteria; p__Bacteroidetes; c__Chitinophagia; o__Chitinophagales; f__Chitinophagaceae; g__Flavisolibacter; s__Flavisolibacter tropicus	d__Bacteria; p__Bacteroidota; c__Bacteroidia; o__Chitinophagales; f__Chitinophagaceae; g__Flavisolibacter_B; s__Flavisolibacter_B tropicus	yes	1492898	yes	yes	0.011	yes
GCA_900129295.1	Flavisolibacter ginsengisoli DSM 18119	d__Bacteria; p__Bacteroidetes; c__Chitinophagia; o__Chitinophagales; f__Chitinophagaceae; g__Flavisolibacter; s__Flavisolibacter ginsengisoli	d__Bacteria; p__Bacteroidota; c__Bacteroidia; o__Chitinophagales; f__Chitinophagaceae; g__Flavisolibacter; s__Flavisolibacter ginsengisoli	yes	1121884	yes	yes	0.03	yes
GCA_003991195.1	Chitinophagaceae bacterium HBUM179779	d__Bacteria; p__Bacteroidetes; c__Chitinophagia; o__Chitinophagales; f__Chitinophagaceae; g__Gynurincola; s__Gynurincola endophyticus	d__Bacteria; p__Bacteroidota; c__Bacteroidia; o__Chitinophagales; f__Chitinophagaceae; g__Gynurincola; s__Gynurincola endophyticus	no
GCA_001623405.1	Hydrotalea flava	d__Bacteria; p__Bacteroidetes; c__Chitinophagia; o__Chitinophagales; f__Chitinophagaceae; g__Hydrotalea; s__Hydrotalea flava	d__Bacteria; p__Bacteroidota; c__Bacteroidia; o__Chitinophagales; f__Chitinophagaceae; g__Hydrotalea; s__Hydrotalea flava	no
GCA_003254115.1	Hydrotalea sandarakina	d__Bacteria; p__Bacteroidetes; c__Chitinophagia; o__Chitinophagales; f__Chitinophagaceae; g__Hydrotalea; s__Hydrotalea sandarakina	d__Bacteria; p__Bacteroidota; c__Bacteroidia; o__Chitinophagales; f__Chitinophagaceae; g__Hydrotalea; s__Hydrotalea sandarakina	yes	1004304	yes	yes	0.0093	yes
GCA_000374125.1	Niabella aurantiaca DSM 17617	d__Bacteria; p__Bacteroidetes; c__Chitinophagia; o__Chitinophagales; f__Chitinophagaceae; g__Niabella; s__Niabella aurantiaca	d__Bacteria; p__Bacteroidota; c__Bacteroidia; o__Chitinophagales; f__Chitinophagaceae; g__Niabella; s__Niabella aurantiaca	no
GCA_900101395.1	Niabella drilacis	d__Bacteria; p__Bacteroidetes; c__Chitinophagia; o__Chitinophagales; f__Chitinophagaceae; g__Niabella; s__Niabella drilacis	d__Bacteria; p__Bacteroidota; c__Bacteroidia; o__Chitinophagales; f__Chitinophagaceae; g__Niabella; s__Niabella drilacis	yes	1285928	yes	yes	0.0016	yes
GCA_001654455.1	Niabella ginsenosidivorans	d__Bacteria; p__Bacteroidetes; c__Chitinophagia; o__Chitinophagales; f__Chitinophagaceae; g__Niabella; s__Niabella ginsenosidivorans	d__Bacteria; p__Bacteroidota; c__Bacteroidia; o__Chitinophagales; f__Chitinophagaceae; g__Niabella; s__Niabella ginsenosidivorans	yes	1176587	yes	yes	0.0024	yes
GCA_000243115.3	Niabella soli DSM 19437	d__Bacteria; p__Bacteroidetes; c__Chitinophagia; o__Chitinophagales; f__Chitinophagaceae; g__Niabella; s__Niabella soli	d__Bacteria; p__Bacteroidota; c__Bacteroidia; o__Chitinophagales; f__Chitinophagaceae; g__Niabella; s__Niabella soli	yes	929713	yes	yes	0.007	yes
GCA_003349965.1	Niabella yanshanensis	d__Bacteria; p__Bacteroidetes; c__Chitinophagia; o__Chitinophagales; f__Chitinophagaceae; g__Niabella; s__Niabella yanshanensis	d__Bacteria; p__Bacteroidota; c__Bacteroidia; o__Chitinophagales; f__Chitinophagaceae; g__Niabella; s__Niabella yanshanensis	no
GCA_000246855.1	Niastella koreensis GR20-10	d__Bacteria; p__Bacteroidetes; c__Chitinophagia; o__Chitinophagales; f__Chitinophagaceae; g__Niastella; s__Niastella koreensis	d__Bacteria; p__Bacteroidota; c__Bacteroidia; o__Chitinophagales; f__Chitinophagaceae; g__Niastella; s__Niastella koreensis	yes	700598	yes	yes	0.0012	yes
GCA_002078015.1	Niastella populi	d__Bacteria; p__Bacteroidetes; c__Chitinophagia; o__Chitinophagales; f__Chitinophagaceae; g__Niastella; s__Niastella populi	d__Bacteria; p__Bacteroidota; c__Bacteroidia; o__Chitinophagales; f__Chitinophagaceae; g__Niastella; s__Niastella populi	yes	550983	yes	yes	0.0012	yes
GCA_002077945.1	Niastella vici	d__Bacteria; p__Bacteroidetes; c__Chitinophagia; o__Chitinophagales; f__Chitinophagaceae; g__Niastella; s__Niastella vici	d__Bacteria; p__Bacteroidota; c__Bacteroidia; o__Chitinophagales; f__Chitinophagaceae; g__Niastella; s__Niastella vici	yes	1703345	yes	yes	0.0002	yes
GCA_900110245.1	Niastella yeongjuensis	d__Bacteria; p__Bacteroidetes; c__Chitinophagia; o__Chitinophagales; f__Chitinophagaceae; g__Niastella; s__Niastella yeongjuensis	d__Bacteria; p__Bacteroidota; c__Bacteroidia; o__Chitinophagales; f__Chitinophagaceae; g__Niastella; s__Niastella yeongjuensis	yes	354355	yes	yes	0.0012	yes
GCA_900115755.1	Parafilimonas terrae	d__Bacteria; p__Bacteroidetes; c__Chitinophagia; o__Chitinophagales; f__Chitinophagaceae; g__Parafilimonas; s__Parafilimonas terrae	d__Bacteria; p__Bacteroidota; c__Bacteroidia; o__Chitinophagales; f__Chitinophagaceae; g__Parafilimonas; s__Parafilimonas terrae	yes	1465490	yes	yes	0.00025	yes
GCA_004291315.1	Pseudobacter ginsenosidimutans	d__Bacteria; p__Bacteroidetes; c__Chitinophagia; o__Chitinophagales; f__Chitinophagaceae; g__Pseudobacter; s__Pseudobacter ginsenosidimutans	d__Bacteria; p__Bacteroidota; c__Bacteroidia; o__Chitinophagales; f__Chitinophagaceae; g__Pseudobacter; s__Pseudobacter ginsenosidimutans	yes	661488	yes	yes	0.0064	yes
GCA_003991355.1	Pseudoflavitalea rhizosphaerae	d__Bacteria; p__Bacteroidetes; c__Chitinophagia; o__Chitinophagales; f__Chitinophagaceae; g__Pseudoflavitalea; s__Pseudoflavitalea rhizosphaerae	d__Bacteria; p__Bacteroidota; c__Bacteroidia; o__Chitinophagales; f__Chitinophagaceae; g__Pseudobacter; s__Pseudobacter rhizosphaerae	no
GCA_900167075.1	Sediminibacterium ginsengisoli	d__Bacteria; p__Bacteroidetes; c__Chitinophagia; o__Chitinophagales; f__Chitinophagaceae; g__Sediminibacterium; s__Sediminibacterium ginsengisoli	d__Bacteria; p__Bacteroidota; c__Bacteroidia; o__Chitinophagales; f__Chitinophagaceae; g__Sediminibacterium; s__Sediminibacterium ginsengisoli	yes	413434	yes	yes	0.0015	yes
GCA_004361915.1	Sediminibacterium goheungense	d__Bacteria; p__Bacteroidetes; c__Chitinophagia; o__Chitinophagales; f__Chitinophagaceae; g__Sediminibacterium; s__Sediminibacterium goheungense	d__Bacteria; p__Bacteroidota; c__Bacteroidia; o__Chitinophagales; f__Chitinophagaceae; g__Sediminibacterium; s__Sediminibacterium goheungense	yes	1086393	yes	yes	0.0038	yes
GCA_002973575.1	Vibrionimonas magnilacihabitans	d__Bacteria; p__Bacteroidetes; c__Chitinophagia; o__Chitinophagales; f__Chitinophagaceae; g__Vibrionimonas; s__Vibrionimonas magnilacihabitans	d__Bacteria; p__Bacteroidota; c__Bacteroidia; o__Chitinophagales; f__Chitinophagaceae; g__Sediminibacterium; s__Sediminibacterium magnilacihabitans	yes	669455	yes	yes	0.016	yes
GCA_000511175.1	Sediminibacterium salmoneum NBRC 103935	d__Bacteria; p__Bacteroidetes; c__Chitinophagia; o__Chitinophagales; f__Chitinophagaceae; g__Sediminibacterium; s__Sediminibacterium salmoneum	d__Bacteria; p__Bacteroidota; c__Bacteroidia; o__Chitinophagales; f__Chitinophagaceae; g__Sediminibacterium; s__Sediminibacterium salmoneum	no
GCA_000374045.1	Segetibacter koreensis DSM 18137	d__Bacteria; p__Bacteroidetes; c__Chitinophagia; o__Chitinophagales; f__Chitinophagaceae; g__Segetibacter; s__Segetibacter koreensis	d__Bacteria; p__Bacteroidota; c__Bacteroidia; o__Chitinophagales; f__Chitinophagaceae; g__Segetibacter; s__Segetibacter koreensis	no
GCA_003014535.1	Taibaiella chishuiensis	d__Bacteria; p__Bacteroidetes; c__Chitinophagia; o__Chitinophagales; f__Chitinophagaceae; g__Taibaiella; s__Taibaiella chishuiensis	d__Bacteria; p__Bacteroidota; c__Bacteroidia; o__Chitinophagales; f__Chitinophagaceae; g__Taibaiella_A; s__Taibaiella_A chishuiensis	yes	1434707	yes	no		no
GCA_003545715.1	Taibaiella koreensis	d__Bacteria; p__Bacteroidetes; c__Chitinophagia; o__Chitinophagales; f__Chitinophagaceae; g__Taibaiella; s__Taibaiella koreensis	d__Bacteria; p__Bacteroidota; c__Bacteroidia; o__Chitinophagales; f__Chitinophagaceae; g__Taibaiella_A; s__Taibaiella_A koreensis	no
GCA_000425585.1	Terrimonas ferruginea DSM 30193	d__Bacteria; p__Bacteroidetes; c__Chitinophagia; o__Chitinophagales; f__Chitinophagaceae; g__Terrimonas; s__Terrimonas ferruginea	d__Bacteria; p__Bacteroidota; c__Bacteroidia; o__Chitinophagales; f__Chitinophagaceae; g__Terrimonas; s__Terrimonas ferruginea	no
GCA_002797735.1	Thermoflavifilum aggregans	d__Bacteria; p__Bacteroidetes; c__Chitinophagia; o__Chitinophagales; f__Chitinophagaceae; g__Thermoflavifilum; s__Thermoflavifilum aggregans	d__Bacteria; p__Bacteroidota; c__Bacteroidia; o__Chitinophagales; f__Chitinophagaceae; g__Thermoflavifilum; s__Thermoflavifilum aggregans	yes	454188	yes	yes	2.7e-05	yes
GCA_900116565.1	Crenotalea thermophila	d__Bacteria; p__Bacteroidetes; c__Chitinophagia; o__Chitinophagales; f__Chitinophagaceae; g__Crenotalea; s__Crenotalea thermophila	d__Bacteria; p__Bacteroidota; c__Bacteroidia; o__Chitinophagales; f__Chitinophagaceae; g__Thermoflavifilum; s__Thermoflavifilum thermophilum	yes	1393122	yes	yes	4.8e-05	yes
GCA_002646595.1	Lewinella nigricans DSM 23189 = NBRC 102662	d__Bacteria; p__Bacteroidetes; c__Saprospiria; o__Saprospirales; f__Lewinellaceae; g__Lewinella; s__Lewinella nigricans	d__Bacteria; p__Bacteroidota; c__Bacteroidia; o__Chitinophagales; f__Saprospiraceae; g__Flavilitoribacter; s__Flavilitoribacter nigricans	yes	1122177	no
GCA_000212735.1	Haliscomenobacter hydrossis DSM 1100	d__Bacteria; p__Bacteroidetes; c__Saprospiria; o__Saprospirales; f__Haliscomenobacteraceae; g__Haliscomenobacter; s__Haliscomenobacter hydrossis	d__Bacteria; p__Bacteroidota; c__Bacteroidia; o__Chitinophagales; f__Saprospiraceae; g__Haliscomenobacter; s__Haliscomenobacter hydrossis	yes	760192	yes	yes	0.0057	yes
GCA_900110645.1	Lewinella agarilytica	d__Bacteria; p__Bacteroidetes; c__Saprospiria; o__Saprospirales; f__Lewinellaceae; g__Lewinella; s__Lewinella agarilytica	d__Bacteria; p__Bacteroidota; c__Bacteroidia; o__Chitinophagales; f__Saprospiraceae; g__Lewinella_A; s__Lewinella_A agarilytica	yes	478744	yes	no		no
GCA_002631205.1	Lewinella marina	d__Bacteria; p__Bacteroidetes; c__Saprospiria; o__Saprospirales; f__Lewinellaceae; g__Lewinella; s__Lewinella marina	d__Bacteria; p__Bacteroidota; c__Bacteroidia; o__Chitinophagales; f__Saprospiraceae; g__Lewinella_A; s__Lewinella_A marina	yes	438751	yes	no		no
GCA_000373105.1	Lewinella persica DSM 23188	d__Bacteria; p__Bacteroidetes; c__Saprospiria; o__Saprospirales; f__Lewinellaceae; g__Lewinella; s__Lewinella persica	d__Bacteria; p__Bacteroidota; c__Bacteroidia; o__Chitinophagales; f__Saprospiraceae; g__Lewinella_A; s__Lewinella_A persica	no
GCA_002934605.1	Lewinella xylanilytica	d__Bacteria; p__Bacteroidetes; c__Saprospiria; o__Saprospirales; f__Lewinellaceae; g__Lewinella; s__Lewinella xylanilytica	d__Bacteria; p__Bacteroidota; c__Bacteroidia; o__Chitinophagales; f__Saprospiraceae; g__Lewinella_A; s__Lewinella_A xylanilytica	yes	1514080	yes	no		no
GCA_000379805.1	Lewinella cohaerens DSM 23179	d__Bacteria; p__Bacteroidetes; c__Saprospiria; o__Saprospirales; f__Lewinellaceae; g__Lewinella; s__Lewinella cohaerens	d__Bacteria; p__Bacteroidota; c__Bacteroidia; o__Chitinophagales; f__Saprospiraceae; g__Lewinella; s__Lewinella cohaerens	no
GCA_000759025.1	Phaeodactylibacter xiamenensis	d__Bacteria; p__Bacteroidetes; c__Saprospiria; o__Saprospirales; f__Haliscomenobacteraceae; g__Phaeodactylibacter; s__Phaeodactylibacter xiamenensis	d__Bacteria; p__Bacteroidota; c__Bacteroidia; o__Chitinophagales; f__Saprospiraceae; g__Phaeodactylibacter; s__Phaeodactylibacter xiamenensis	yes	1524460	yes	yes	0.0018	yes
GCA_000250635.1	Saprospira grandis str. Lewin	d__Bacteria; p__Bacteroidetes; c__Saprospiria; o__Saprospirales; f__Saprospiraceae; g__Saprospira; s__Saprospira grandis	d__Bacteria; p__Bacteroidota; c__Bacteroidia; o__Chitinophagales; f__Saprospiraceae; g__Saprospira; s__Saprospira grandis_B	yes	984262	yes	yes	8e-06	yes
GCA_000265505.1	Bernardetia litoralis DSM 6794	d__Bacteria; p__Bacteroidetes; c__Cytophagia; o__Cytophagales; f__Bernardetiaceae; g__Bernardetia; s__Bernardetia litoralis	d__Bacteria; p__Bacteroidota; c__Bacteroidia; o__Cytophagales; f__Bernardetiaceae; g__Bernardetia; s__Bernardetia litoralis	yes	880071	yes	yes	0.00066	yes
GCA_000422585.1	Hugenholtzia roseola DSM 9546	d__Bacteria; p__Bacteroidetes; c__Cytophagia; o__Cytophagales; f__Bernardetiaceae; g__Hugenholtzia; s__Hugenholtzia roseola	d__Bacteria; p__Bacteroidota; c__Bacteroidia; o__Cytophagales; f__Bernardetiaceae; g__Hugenholtzia; s__Hugenholtzia roseola	no
GCA_900100765.1	Catalinimonas alkaloidigena	d__Bacteria; p__Bacteroidetes; c__Cytophagia; o__Cytophagales; f__Catalimonadaceae; g__Catalinimonas; s__Catalinimonas alkaloidigena	d__Bacteria; p__Bacteroidota; c__Bacteroidia; o__Cytophagales; f__Catalimonadaceae; g__Catalinimonas; s__Catalinimonas alkaloidigena	yes	1075417	yes	yes	1.2e-06	yes
GCA_900112255.1	Flexibacter flexilis DSM 6793	d__Bacteria; p__Bacteroidetes; c__Cytophagia; o__Cytophagales; f__Cytophagaceae; g__Flexibacter; s__Flexibacter flexilis	d__Bacteria; p__Bacteroidota; c__Bacteroidia; o__Cytophagales; f__Catalimonadaceae; g__Flexibacter; s__Flexibacter flexilis	yes	927664	yes	yes	2.8e-08	yes
GCA_900103735.1	Algoriphagus alkaliphilus	d__Bacteria; p__Bacteroidetes; c__Cytophagia; o__Cytophagales; f__Cyclobacteriaceae; g__Algoriphagus; s__Algoriphagus alkaliphilus	d__Bacteria; p__Bacteroidota; c__Bacteroidia; o__Cytophagales; f__Cyclobacteriaceae; g__Algoriphagus; s__Algoriphagus alkaliphilus	yes	279824	yes	yes	3.2e-05	yes
GCA_002150685.1	Algoriphagus antarcticus	d__Bacteria; p__Bacteroidetes; c__Cytophagia; o__Cytophagales; f__Cyclobacteriaceae; g__Algoriphagus; s__Algoriphagus antarcticus	d__Bacteria; p__Bacteroidota; c__Bacteroidia; o__Cytophagales; f__Cyclobacteriaceae; g__Algoriphagus; s__Algoriphagus antarcticus	no
GCA_003253485.1	Algoriphagus aquaeductus	d__Bacteria; p__Bacteroidetes; c__Cytophagia; o__Cytophagales; f__Cyclobacteriaceae; g__Algoriphagus; s__Algoriphagus aquaeductus	d__Bacteria; p__Bacteroidota; c__Bacteroidia; o__Cytophagales; f__Cyclobacteriaceae; g__Algoriphagus; s__Algoriphagus aquaeductus	yes	475299	yes	yes	5.1e-05	yes
GCA_900112005.1	Algoriphagus aquimarinus	d__Bacteria; p__Bacteroidetes; c__Cytophagia; o__Cytophagales; f__Cyclobacteriaceae; g__Algoriphagus; s__Algoriphagus aquimarinus	d__Bacteria; p__Bacteroidota; c__Bacteroidia; o__Cytophagales; f__Cyclobacteriaceae; g__Algoriphagus; s__Algoriphagus aquimarinus	yes	237018	yes	yes	3.2e-05	yes
GCA_900108085.1	Algoriphagus boritolerans DSM 17298 = JCM 18970	d__Bacteria; p__Bacteroidetes; c__Cytophagia; o__Cytophagales; f__Cyclobacteriaceae; g__Algoriphagus; s__Algoriphagus boritolerans	d__Bacteria; p__Bacteroidota; c__Bacteroidia; o__Cytophagales; f__Cyclobacteriaceae; g__Algoriphagus; s__Algoriphagus boritolerans	yes	1120964	yes	yes	5.1e-05	yes
GCA_004362805.1	Algoriphagus boseongensis	d__Bacteria; p__Bacteroidetes; c__Cytophagia; o__Cytophagales; f__Cyclobacteriaceae; g__Algoriphagus; s__Algoriphagus boseongensis	d__Bacteria; p__Bacteroidota; c__Bacteroidia; o__Cytophagales; f__Cyclobacteriaceae; g__Algoriphagus; s__Algoriphagus boseongensis	yes	1442587	yes	yes	2.3e-06	yes
GCA_003254055.1	Algoriphagus chordae	d__Bacteria; p__Bacteroidetes; c__Cytophagia; o__Cytophagales; f__Cyclobacteriaceae; g__Algoriphagus; s__Algoriphagus chordae	d__Bacteria; p__Bacteroidota; c__Bacteroidia; o__Cytophagales; f__Cyclobacteriaceae; g__Algoriphagus; s__Algoriphagus chordae	yes	237019	yes	yes	3.2e-05	yes
GCA_900101705.1	Algoriphagus faecimaris	d__Bacteria; p__Bacteroidetes; c__Cytophagia; o__Cytophagales; f__Cyclobacteriaceae; g__Algoriphagus; s__Algoriphagus faecimaris	d__Bacteria; p__Bacteroidota; c__Bacteroidia; o__Cytophagales; f__Cyclobacteriaceae; g__Algoriphagus; s__Algoriphagus faecimaris	yes	686796	yes	yes	4.6e-05	yes
GCA_900129785.1	Algoriphagus halophilus	d__Bacteria; p__Bacteroidetes; c__Cytophagia; o__Cytophagales; f__Cyclobacteriaceae; g__Algoriphagus; s__Algoriphagus halophilus	d__Bacteria; p__Bacteroidota; c__Bacteroidia; o__Cytophagales; f__Cyclobacteriaceae; g__Algoriphagus; s__Algoriphagus halophilus	yes	226505	yes	yes	3.2e-05	yes
GCA_900113375.1	Algoriphagus hitonicola	d__Bacteria; p__Bacteroidetes; c__Cytophagia; o__Cytophagales; f__Cyclobacteriaceae; g__Algoriphagus; s__Algoriphagus hitonicola	d__Bacteria; p__Bacteroidota; c__Bacteroidia; o__Cytophagales; f__Cyclobacteriaceae; g__Algoriphagus; s__Algoriphagus hitonicola	yes	435880	yes	yes	0.00014	yes
GCA_900116615.1	Algoriphagus locisalis	d__Bacteria; p__Bacteroidetes; c__Cytophagia; o__Cytophagales; f__Cyclobacteriaceae; g__Algoriphagus; s__Algoriphagus locisalis	d__Bacteria; p__Bacteroidota; c__Bacteroidia; o__Cytophagales; f__Cyclobacteriaceae; g__Algoriphagus; s__Algoriphagus locisalis	yes	305507	yes	yes	3.2e-05	yes
GCA_000166275.1	Algoriphagus machipongonensis	d__Bacteria; p__Bacteroidetes; c__Cytophagia; o__Cytophagales; f__Cyclobacteriaceae; g__Algoriphagus; s__Algoriphagus machipongonensis	d__Bacteria; p__Bacteroidota; c__Bacteroidia; o__Cytophagales; f__Cyclobacteriaceae; g__Algoriphagus; s__Algoriphagus machipongonensis	yes	388413	yes	yes	2.3e-06	yes
GCA_000429425.1	Algoriphagus mannitolivorans DSM 15301	d__Bacteria; p__Bacteroidetes; c__Cytophagia; o__Cytophagales; f__Cyclobacteriaceae; g__Algoriphagus; s__Algoriphagus mannitolivorans	d__Bacteria; p__Bacteroidota; c__Bacteroidia; o__Cytophagales; f__Cyclobacteriaceae; g__Algoriphagus; s__Algoriphagus mannitolivorans	no
GCA_000429405.1	Algoriphagus marincola DSM 16067	d__Bacteria; p__Bacteroidetes; c__Cytophagia; o__Cytophagales; f__Cyclobacteriaceae; g__Algoriphagus; s__Algoriphagus marincola	d__Bacteria; p__Bacteroidota; c__Bacteroidia; o__Cytophagales; f__Cyclobacteriaceae; g__Algoriphagus; s__Algoriphagus marincola	no
GCA_001936475.1	Algoriphagus marinus	d__Bacteria; p__Bacteroidetes; c__Cytophagia; o__Cytophagales; f__Cyclobacteriaceae; g__Algoriphagus; s__Algoriphagus marinus	d__Bacteria; p__Bacteroidota; c__Bacteroidia; o__Cytophagales; f__Cyclobacteriaceae; g__Algoriphagus; s__Algoriphagus marinus	no
GCA_900115305.1	Algoriphagus ornithinivorans	d__Bacteria; p__Bacteroidetes; c__Cytophagia; o__Cytophagales; f__Cyclobacteriaceae; g__Algoriphagus; s__Algoriphagus ornithinivorans	d__Bacteria; p__Bacteroidota; c__Bacteroidia; o__Cytophagales; f__Cyclobacteriaceae; g__Algoriphagus; s__Algoriphagus ornithinivorans	yes	226506	yes	yes	0.00014	yes
GCA_002150505.1	Algoriphagus ratkowskyi	d__Bacteria; p__Bacteroidetes; c__Cytophagia; o__Cytophagales; f__Cyclobacteriaceae; g__Algoriphagus; s__Algoriphagus ratkowskyi	d__Bacteria; p__Bacteroidota; c__Bacteroidia; o__Cytophagales; f__Cyclobacteriaceae; g__Algoriphagus; s__Algoriphagus ratkowskyi	no
GCA_001442615.1	Algoriphagus resistens	d__Bacteria; p__Bacteroidetes; c__Cytophagia; o__Cytophagales; f__Cyclobacteriaceae; g__Algoriphagus; s__Algoriphagus resistens	d__Bacteria; p__Bacteroidota; c__Bacteroidia; o__Cytophagales; f__Cyclobacteriaceae; g__Algoriphagus; s__Algoriphagus resistens	no
GCA_000429445.1	Algoriphagus terrigena DSM 22685	d__Bacteria; p__Bacteroidetes; c__Cytophagia; o__Cytophagales; f__Cyclobacteriaceae; g__Algoriphagus; s__Algoriphagus terrigena	d__Bacteria; p__Bacteroidota; c__Bacteroidia; o__Cytophagales; f__Cyclobacteriaceae; g__Algoriphagus; s__Algoriphagus terrigena	no
GCA_000429465.1	Algoriphagus vanfongensis DSM 17529	d__Bacteria; p__Bacteroidetes; c__Cytophagia; o__Cytophagales; f__Cyclobacteriaceae; g__Algoriphagus; s__Algoriphagus vanfongensis	d__Bacteria; p__Bacteroidota; c__Bacteroidia; o__Cytophagales; f__Cyclobacteriaceae; g__Algoriphagus; s__Algoriphagus vanfongensis	no
GCA_003259505.1	Algoriphagus yeomjeoni	d__Bacteria; p__Bacteroidetes; c__Cytophagia; o__Cytophagales; f__Cyclobacteriaceae; g__Algoriphagus; s__Algoriphagus yeomjeoni	d__Bacteria; p__Bacteroidota; c__Bacteroidia; o__Cytophagales; f__Cyclobacteriaceae; g__Algoriphagus; s__Algoriphagus yeomjeoni	yes	291403	yes	yes	3.2e-05	yes
GCA_900148515.1	Algoriphagus zhangzhouensis	d__Bacteria; p__Bacteroidetes; c__Cytophagia; o__Cytophagales; f__Cyclobacteriaceae; g__Algoriphagus; s__Algoriphagus zhangzhouensis	d__Bacteria; p__Bacteroidota; c__Bacteroidia; o__Cytophagales; f__Cyclobacteriaceae; g__Algoriphagus; s__Algoriphagus zhangzhouensis	yes	1073327	yes	yes	3.1e-05	yes
GCA_900176595.1	Aquiflexum balticum DSM 16537	d__Bacteria; p__Bacteroidetes; c__Cytophagia; o__Cytophagales; f__Cyclobacteriaceae; g__Aquiflexum; s__Aquiflexum balticum	d__Bacteria; p__Bacteroidota; c__Bacteroidia; o__Cytophagales; f__Cyclobacteriaceae; g__Aquiflexum; s__Aquiflexum balticum	yes	758820	yes	yes	0.00052	yes
GCA_000265405.1	Belliella baltica DSM 15883	d__Bacteria; p__Bacteroidetes; c__Cytophagia; o__Cytophagales; f__Cyclobacteriaceae; g__Belliella; s__Belliella baltica	d__Bacteria; p__Bacteroidota; c__Bacteroidia; o__Cytophagales; f__Cyclobacteriaceae; g__Belliella; s__Belliella baltica	yes	866536	yes	yes	1.2e-05	yes
GCA_900188245.1	Belliella buryatensis	d__Bacteria; p__Bacteroidetes; c__Cytophagia; o__Cytophagales; f__Cyclobacteriaceae; g__Belliella; s__Belliella buryatensis	d__Bacteria; p__Bacteroidota; c__Bacteroidia; o__Cytophagales; f__Cyclobacteriaceae; g__Belliella; s__Belliella buryatensis	yes	1500549	yes	yes	0.00016	yes
GCA_900156785.1	Belliella pelovolcani	d__Bacteria; p__Bacteroidetes; c__Cytophagia; o__Cytophagales; f__Cyclobacteriaceae; g__Belliella; s__Belliella pelovolcani	d__Bacteria; p__Bacteroidota; c__Bacteroidia; o__Cytophagales; f__Cyclobacteriaceae; g__Belliella; s__Belliella pelovolcani	yes	529505	yes	yes	0.00016	yes
GCA_004216715.1	Cecembia calidifontis	d__Bacteria; p__Bacteroidetes; c__Cytophagia; o__Cytophagales; f__Cyclobacteriaceae; g__Cecembia; s__Cecembia calidifontis	d__Bacteria; p__Bacteroidota; c__Bacteroidia; o__Cytophagales; f__Cyclobacteriaceae; g__Cecembia; s__Cecembia calidifontis	yes	1187080	yes	yes	4.4e-05	yes
GCA_000298295.1	Cecembia lonarensis LW9	d__Bacteria; p__Bacteroidetes; c__Cytophagia; o__Cytophagales; f__Cyclobacteriaceae; g__Cecembia; s__Cecembia lonarensis	d__Bacteria; p__Bacteroidota; c__Bacteroidia; o__Cytophagales; f__Cyclobacteriaceae; g__Cecembia; s__Cecembia lonarensis	yes	1225176	yes	yes	0.00012	yes
GCA_003014575.1	Cecembia rubra	d__Bacteria; p__Bacteroidetes; c__Cytophagia; o__Cytophagales; f__Cyclobacteriaceae; g__Cecembia; s__Cecembia rubra	d__Bacteria; p__Bacteroidota; c__Bacteroidia; o__Cytophagales; f__Cyclobacteriaceae; g__Cecembia; s__Cecembia rubra	yes	1485585	yes	yes	4.9e-05	yes
GCA_000348925.1	Cesiribacter andamanensis AMV16	d__Bacteria; p__Bacteroidetes; c__Cytophagia; o__Cytophagales; f__Flammeovirgaceae; g__Cesiribacter; s__Cesiribacter andamanensis	d__Bacteria; p__Bacteroidota; c__Bacteroidia; o__Cytophagales; f__Cyclobacteriaceae; g__Cesiribacter; s__Cesiribacter andamanensis	yes	1279009	yes	yes	1e-05	yes
GCA_003286915.1	Chryseolinea flava	d__Bacteria; p__Bacteroidetes; c__Cytophagia; o__Cytophagales; f__; g__Chryseolinea; s__Chryseolinea flava	d__Bacteria; p__Bacteroidota; c__Bacteroidia; o__Cytophagales; f__Cyclobacteriaceae; g__Chryseolinea_A; s__Chryseolinea_A flava	yes	2059302	yes	yes	1.8e-05	yes
GCA_900129725.1	Chryseolinea serpens	d__Bacteria; p__Bacteroidetes; c__Cytophagia; o__Cytophagales; f__; g__Chryseolinea; s__Chryseolinea serpens	d__Bacteria; p__Bacteroidota; c__Bacteroidia; o__Cytophagales; f__Cyclobacteriaceae; g__Chryseolinea; s__Chryseolinea serpens	yes	947013	yes	yes	0.0013	yes
GCA_001050135.1	Cyclobacterium amurskyense	d__Bacteria; p__Bacteroidetes; c__Cytophagia; o__Cytophagales; f__Cyclobacteriaceae; g__Cyclobacterium; s__Cyclobacterium amurskyense	d__Bacteria; p__Bacteroidota; c__Bacteroidia; o__Cytophagales; f__Cyclobacteriaceae; g__Cyclobacterium; s__Cyclobacterium amurskyense	yes	320787	yes	yes	0.00014	yes
GCA_900109255.1	Cyclobacterium halophilum	d__Bacteria; p__Bacteroidetes; c__Cytophagia; o__Cytophagales; f__Cyclobacteriaceae; g__Cyclobacterium; s__Cyclobacterium halophilum	d__Bacteria; p__Bacteroidota; c__Bacteroidia; o__Cytophagales; f__Cyclobacteriaceae; g__Cyclobacterium; s__Cyclobacterium halophilum	yes	1297121	yes	yes	4.5e-05	yes
GCA_900143075.1	Cyclobacterium lianum	d__Bacteria; p__Bacteroidetes; c__Cytophagia; o__Cytophagales; f__Cyclobacteriaceae; g__Cyclobacterium; s__Cyclobacterium lianum	d__Bacteria; p__Bacteroidota; c__Bacteroidia; o__Cytophagales; f__Cyclobacteriaceae; g__Cyclobacterium; s__Cyclobacterium lianum	yes	388280	yes	yes	2.6e-05	yes
GCA_000222485.1	Cyclobacterium marinum DSM 745	d__Bacteria; p__Bacteroidetes; c__Cytophagia; o__Cytophagales; f__Cyclobacteriaceae; g__Cyclobacterium; s__Cyclobacterium marinum	d__Bacteria; p__Bacteroidota; c__Bacteroidia; o__Cytophagales; f__Cyclobacteriaceae; g__Cyclobacterium; s__Cyclobacterium marinum	yes	880070	yes	yes	0.00011	yes
GCA_000427295.1	Cyclobacterium qasimii M12-11B	d__Bacteria; p__Bacteroidetes; c__Cytophagia; o__Cytophagales; f__Cyclobacteriaceae; g__Cyclobacterium; s__Cyclobacterium qasimii	d__Bacteria; p__Bacteroidota; c__Bacteroidia; o__Cytophagales; f__Cyclobacteriaceae; g__Cyclobacterium; s__Cyclobacterium qasimii	yes	641524	yes	yes	5.1e-05	yes
GCA_000373245.1	Echinicola pacifica DSM 19836	d__Bacteria; p__Bacteroidetes; c__Cytophagia; o__Cytophagales; f__Cyclobacteriaceae; g__Echinicola; s__Echinicola pacifica	d__Bacteria; p__Bacteroidota; c__Bacteroidia; o__Cytophagales; f__Cyclobacteriaceae; g__Echinicola; s__Echinicola pacifica	no
GCA_005281475.1	Echinicola rosea	d__Bacteria; p__Bacteroidetes; c__Cytophagia; o__Cytophagales; f__Cyclobacteriaceae; g__Echinicola; s__Echinicola rosea	d__Bacteria; p__Bacteroidota; c__Bacteroidia; o__Cytophagales; f__Cyclobacteriaceae; g__Echinicola; s__Echinicola rosea	no
GCA_003260975.1	Echinicola strongylocentroti	d__Bacteria; p__Bacteroidetes; c__Cytophagia; o__Cytophagales; f__Cyclobacteriaceae; g__Echinicola; s__Echinicola strongylocentroti	d__Bacteria; p__Bacteroidota; c__Bacteroidia; o__Cytophagales; f__Cyclobacteriaceae; g__Echinicola; s__Echinicola strongylocentroti	yes	1795355	yes	yes	3.2e-06	yes
GCA_000325705.1	Echinicola vietnamensis DSM 17526	d__Bacteria; p__Bacteroidetes; c__Cytophagia; o__Cytophagales; f__Cyclobacteriaceae; g__Echinicola; s__Echinicola vietnamensis	d__Bacteria; p__Bacteroidota; c__Bacteroidia; o__Cytophagales; f__Cyclobacteriaceae; g__Echinicola; s__Echinicola vietnamensis	yes	926556	yes	yes	6.2e-07	yes
GCA_900188325.1	Ekhidna lutea	d__Bacteria; p__Bacteroidetes; c__Cytophagia; o__Cytophagales; f__Cytophagaceae; g__Ekhidna; s__Ekhidna lutea	d__Bacteria; p__Bacteroidota; c__Bacteroidia; o__Cytophagales; f__Cyclobacteriaceae; g__Ekhidna; s__Ekhidna lutea	yes	447679	yes	yes	1.2e-05	yes
GCA_001747105.1	Fabibacter misakiensis	d__Bacteria; p__Bacteroidetes; c__Cytophagia; o__Cytophagales; f__Flammeovirgaceae; g__Fabibacter; s__Fabibacter misakiensis	d__Bacteria; p__Bacteroidota; c__Bacteroidia; o__Cytophagales; f__Cyclobacteriaceae; g__Fabibacter; s__Fabibacter misakiensis	yes	1563681	yes	yes	5.8e-06	yes
GCA_900111145.1	Fabibacter pacificus	d__Bacteria; p__Bacteroidetes; c__Cytophagia; o__Cytophagales; f__Flammeovirgaceae; g__Fabibacter; s__Fabibacter pacificus	d__Bacteria; p__Bacteroidota; c__Bacteroidia; o__Cytophagales; f__Cyclobacteriaceae; g__Fabibacter; s__Fabibacter pacificus	yes	1267423	yes	yes	6.3e-05	yes
GCA_001592965.1	Roseivirga spongicola	d__Bacteria; p__Bacteroidetes; c__Cytophagia; o__Cytophagales; f__Flammeovirgaceae; g__Roseivirga; s__Roseivirga spongicola	d__Bacteria; p__Bacteroidota; c__Bacteroidia; o__Cytophagales; f__Cyclobacteriaceae; g__Fabibacter; s__Fabibacter spongicola	yes	333140	yes	yes	8.2e-05	yes
GCA_000331535.1	Fulvivirga imtechensis AK7	d__Bacteria; p__Bacteroidetes; c__Cytophagia; o__Cytophagales; f__Flammeovirgaceae; g__Fulvivirga; s__Fulvivirga imtechensis	d__Bacteria; p__Bacteroidota; c__Bacteroidia; o__Cytophagales; f__Cyclobacteriaceae; g__Fulvivirga; s__Fulvivirga imtechensis	yes	1237149	yes	yes	4.8e-06	yes
GCA_000295935.2	Indibacter alkaliphilus LW1	d__Bacteria; p__Bacteroidetes; c__Cytophagia; o__Cytophagales; f__Cyclobacteriaceae; g__Indibacter; s__Indibacter alkaliphilus	d__Bacteria; p__Bacteroidota; c__Bacteroidia; o__Cytophagales; f__Cyclobacteriaceae; g__Indibacter; s__Indibacter alkaliphilus	yes	1189612	yes	yes	0.00016	yes
GCA_000390185.1	Lunatimonas lonarensis	d__Bacteria; p__Bacteroidetes; c__Cytophagia; o__Cytophagales; f__Cyclobacteriaceae; g__Lunatimonas; s__Lunatimonas lonarensis	d__Bacteria; p__Bacteroidota; c__Bacteroidia; o__Cytophagales; f__Cyclobacteriaceae; g__Lunatimonas; s__Lunatimonas lonarensis	yes	1232681	yes	yes	0.0004	yes
GCA_000330725.2	Mariniradius saccharolyticus AK6	d__Bacteria; p__Bacteroidetes; c__Cytophagia; o__Cytophagales; f__Cyclobacteriaceae; g__Mariniradius; s__Mariniradius saccharolyticus	d__Bacteria; p__Bacteroidota; c__Bacteroidia; o__Cytophagales; f__Cyclobacteriaceae; g__Mariniradius; s__Mariniradius saccharolyticus	yes	1239962	yes	yes	2.4e-06	yes
GCA_003386095.1	Marinoscillum furvescens DSM 4134	d__Bacteria; p__Bacteroidetes; c__Cytophagia; o__Cytophagales; f__Cytophagaceae; g__Marinoscillum; s__Marinoscillum furvescens	d__Bacteria; p__Bacteroidota; c__Bacteroidia; o__Cytophagales; f__Cyclobacteriaceae; g__Marinoscillum; s__Marinoscillum furvescens	yes	1122208	yes	yes	3.3e-06	yes
GCA_900177665.1	Marivirga sericea	d__Bacteria; p__Bacteroidetes; c__Cytophagia; o__Cytophagales; f__Flammeovirgaceae; g__Marivirga; s__Marivirga sericea	d__Bacteria; p__Bacteroidota; c__Bacteroidia; o__Cytophagales; f__Cyclobacteriaceae; g__Marivirga; s__Marivirga sericea	yes	1028	yes	yes	0.00011	yes
GCA_000183425.1	Marivirga tractuosa DSM 4126	d__Bacteria; p__Bacteroidetes; c__Cytophagia; o__Cytophagales; f__Flammeovirgaceae; g__Marivirga; s__Marivirga tractuosa	d__Bacteria; p__Bacteroidota; c__Bacteroidia; o__Cytophagales; f__Cyclobacteriaceae; g__Marivirga; s__Marivirga tractuosa	yes	643867	yes	yes	3e-05	yes
GCA_003003005.1	Mongoliibacter ruber	d__Bacteria; p__Bacteroidetes; c__Cytophagia; o__Cytophagales; f__Cyclobacteriaceae; g__Mongoliibacter; s__Mongoliibacter ruber	d__Bacteria; p__Bacteroidota; c__Bacteroidia; o__Cytophagales; f__Cyclobacteriaceae; g__Mongoliibacter; s__Mongoliibacter ruber	yes	1750599	yes	yes	0.00016	yes
GCA_000346615.1	Nafulsella turpanensis ZLM-10	d__Bacteria; p__Bacteroidetes; c__Cytophagia; o__Cytophagales; f__Flammeovirgaceae; g__Nafulsella; s__Nafulsella turpanensis	d__Bacteria; p__Bacteroidota; c__Bacteroidia; o__Cytophagales; f__Cyclobacteriaceae; g__Nafulsella; s__Nafulsella turpanensis	no
GCA_000265075.1	Nitritalea halalkaliphila LW7	d__Bacteria; p__Bacteroidetes; c__Cytophagia; o__Cytophagales; f__Cyclobacteriaceae; g__Nitritalea; s__Nitritalea halalkaliphila	d__Bacteria; p__Bacteroidota; c__Bacteroidia; o__Cytophagales; f__Cyclobacteriaceae; g__Nitritalea; s__Nitritalea halalkaliphila	yes	1189621	no
GCA_900167975.1	Ohtaekwangia koreensis	d__Bacteria; p__Bacteroidetes; c__Cytophagia; o__Cytophagales; f__Cytophagaceae; g__Ohtaekwangia; s__Ohtaekwangia koreensis	d__Bacteria; p__Bacteroidota; c__Bacteroidia; o__Cytophagales; f__Cyclobacteriaceae; g__Ohtaekwangia; s__Ohtaekwangia koreensis	yes	688867	yes	yes	1.9e-05	yes
GCA_900142205.1	Reichenbachiella agariperforans	d__Bacteria; p__Bacteroidetes; c__Cytophagia; o__Cytophagales; f__Flammeovirgaceae; g__Reichenbachiella; s__Reichenbachiella agariperforans	d__Bacteria; p__Bacteroidota; c__Bacteroidia; o__Cytophagales; f__Cyclobacteriaceae; g__Reichenbachiella; s__Reichenbachiella agariperforans	yes	156994	yes	yes	4.7e-05	yes
GCA_900176375.1	Reichenbachiella faecimaris	d__Bacteria; p__Bacteroidetes; c__Cytophagia; o__Cytophagales; f__Flammeovirgaceae; g__Reichenbachiella; s__Reichenbachiella faecimaris	d__Bacteria; p__Bacteroidota; c__Bacteroidia; o__Cytophagales; f__Cyclobacteriaceae; g__Reichenbachiella; s__Reichenbachiella faecimaris	yes	692418	yes	yes	6e-05	yes
GCA_003171675.1	Reichenbachiella versicolor	d__Bacteria; p__Bacteroidetes; c__Cytophagia; o__Cytophagales; f__Flammeovirgaceae; g__Reichenbachiella; s__Reichenbachiella versicolor	d__Bacteria; p__Bacteroidota; c__Bacteroidia; o__Cytophagales; f__Cyclobacteriaceae; g__Reichenbachiella; s__Reichenbachiella versicolor	no
GCA_000381545.1	Rhodonellum psychrophilum GCM71 = DSM 17998	d__Bacteria; p__Bacteroidetes; c__Cytophagia; o__Cytophagales; f__Cytophagaceae; g__Rhodonellum; s__Rhodonellum psychrophilum	d__Bacteria; p__Bacteroidota; c__Bacteroidia; o__Cytophagales; f__Cyclobacteriaceae; g__Rhodonellum; s__Rhodonellum psychrophilum	no
GCA_001592935.1	Roseivirga echinicomitans	d__Bacteria; p__Bacteroidetes; c__Cytophagia; o__Cytophagales; f__Flammeovirgaceae; g__Roseivirga; s__Roseivirga echinicomitans	d__Bacteria; p__Bacteroidota; c__Bacteroidia; o__Cytophagales; f__Cyclobacteriaceae; g__Roseivirga; s__Roseivirga echinicomitans	yes	296218	yes	yes	4.1e-05	yes
GCA_001593005.1	Roseivirga ehrenbergii	d__Bacteria; p__Bacteroidetes; c__Cytophagia; o__Cytophagales; f__Flammeovirgaceae; g__Roseivirga; s__Roseivirga ehrenbergii	d__Bacteria; p__Bacteroidota; c__Bacteroidia; o__Cytophagales; f__Cyclobacteriaceae; g__Roseivirga; s__Roseivirga ehrenbergii	yes	279360	yes	yes	1.2e-05	yes
GCA_001592945.1	Roseivirga seohaensis	d__Bacteria; p__Bacteroidetes; c__Cytophagia; o__Cytophagales; f__Flammeovirgaceae; g__Roseivirga; s__Roseivirga seohaensis	d__Bacteria; p__Bacteroidota; c__Bacteroidia; o__Cytophagales; f__Cyclobacteriaceae; g__Roseivirga; s__Roseivirga seohaensis	yes	1914963	yes	yes	1.2e-05	yes
GCA_000379725.1	Cytophaga aurantiaca DSM 3654	d__Bacteria; p__Bacteroidetes; c__Cytophagia; o__Cytophagales; f__Cytophagaceae; g__Cytophaga; s__Cytophaga aurantiaca	d__Bacteria; p__Bacteroidota; c__Bacteroidia; o__Cytophagales; f__Cytophagaceae; g__Cytophaga; s__Cytophaga aurantiaca	no
GCA_000014145.1	Cytophaga hutchinsonii ATCC 33406	d__Bacteria; p__Bacteroidetes; c__Cytophagia; o__Cytophagales; f__Cytophagaceae; g__Cytophaga; s__Cytophaga hutchinsonii	d__Bacteria; p__Bacteroidota; c__Bacteroidia; o__Cytophagales; f__Cytophagaceae; g__Cytophaga; s__Cytophaga hutchinsonii	yes	269798	yes	no		no
GCA_000426725.1	Sporocytophaga myxococcoides DSM 11118	d__Bacteria; p__Bacteroidetes; c__Cytophagia; o__Cytophagales; f__Cytophagaceae; g__Sporocytophaga; s__Sporocytophaga myxococcoides	d__Bacteria; p__Bacteroidota; c__Bacteroidia; o__Cytophagales; f__Cytophagaceae; g__Sporocytophaga; s__Sporocytophaga myxococcoides	no
GCA_000807855.2	Flammeovirga pacifica	d__Bacteria; p__Bacteroidetes; c__Cytophagia; o__Cytophagales; f__Flammeovirgaceae; g__Flammeovirga; s__Flammeovirga pacifica	d__Bacteria; p__Bacteroidota; c__Bacteroidia; o__Cytophagales; f__Flammeovirgaceae; g__Flammeovirga; s__Flammeovirga pacifica	yes	915059	yes	no		no
GCA_000379765.1	Flexithrix dorotheae DSM 6795	d__Bacteria; p__Bacteroidetes; c__Cytophagia; o__Cytophagales; f__Flammeovirgaceae; g__Flexithrix; s__Flexithrix dorotheae	d__Bacteria; p__Bacteroidota; c__Bacteroidia; o__Cytophagales; f__Flammeovirgaceae; g__Flexithrix; s__Flexithrix dorotheae	no
GCA_003149185.1	Sediminitomix flava	d__Bacteria; p__Bacteroidetes; c__Cytophagia; o__Cytophagales; f__Flammeovirgaceae; g__Sediminitomix; s__Sediminitomix flava	d__Bacteria; p__Bacteroidota; c__Bacteroidia; o__Cytophagales; f__Flammeovirgaceae; g__Sediminitomix; s__Sediminitomix flava	yes	379075	yes	yes	0.00011	yes
GCA_000473365.1	Adhaeribacter aquaticus DSM 16391	d__Bacteria; p__Bacteroidetes; c__Cytophagia; o__Cytophagales; f__Hymenobacteraceae; g__Adhaeribacter; s__Adhaeribacter aquaticus	d__Bacteria; p__Bacteroidota; c__Bacteroidia; o__Cytophagales; f__Hymenobacteraceae; g__Adhaeribacter; s__Adhaeribacter aquaticus	no
GCA_900111515.1	Hymenobacter actinosclerus	d__Bacteria; p__Bacteroidetes; c__Cytophagia; o__Cytophagales; f__Hymenobacteraceae; g__Hymenobacter; s__Hymenobacter actinosclerus	d__Bacteria; p__Bacteroidota; c__Bacteroidia; o__Cytophagales; f__Hymenobacteraceae; g__Hymenobacter; s__Hymenobacter actinosclerus	yes	82805	yes	yes	0.0013	yes
GCA_000382225.1	Hymenobacter aerophilus DSM 13606	d__Bacteria; p__Bacteroidetes; c__Cytophagia; o__Cytophagales; f__Hymenobacteraceae; g__Hymenobacter; s__Hymenobacter aerophilus	d__Bacteria; p__Bacteroidota; c__Bacteroidia; o__Cytophagales; f__Hymenobacteraceae; g__Hymenobacter; s__Hymenobacter aerophilus	no
GCA_002204745.1	Hymenobacter amundsenii	d__Bacteria; p__Bacteroidetes; c__Cytophagia; o__Cytophagales; f__Hymenobacteraceae; g__Hymenobacter; s__Hymenobacter amundsenii	d__Bacteria; p__Bacteroidota; c__Bacteroidia; o__Cytophagales; f__Hymenobacteraceae; g__Hymenobacter; s__Hymenobacter amundsenii	yes	2006685	yes	yes	0.0016	yes
GCA_004765605.1	Hymenobacter aquaticus	d__Bacteria; p__Bacteroidetes; c__Cytophagia; o__Cytophagales; f__Hymenobacteraceae; g__Hymenobacter; s__Hymenobacter aquaticus	d__Bacteria; p__Bacteroidota; c__Bacteroidia; o__Cytophagales; f__Hymenobacteraceae; g__Hymenobacter; s__Hymenobacter aquaticus	yes	1867101	yes	yes	0.00011	yes
GCA_002797555.1	Hymenobacter chitinivorans DSM 11115	d__Bacteria; p__Bacteroidetes; c__Cytophagia; o__Cytophagales; f__Hymenobacteraceae; g__Hymenobacter; s__Hymenobacter chitinivorans	d__Bacteria; p__Bacteroidota; c__Bacteroidia; o__Cytophagales; f__Hymenobacteraceae; g__Hymenobacter; s__Hymenobacter chitinivorans	yes	1121954	yes	yes	0.00013	yes
GCA_001816125.1	Hymenobacter coccineus	d__Bacteria; p__Bacteroidetes; c__Cytophagia; o__Cytophagales; f__Hymenobacteraceae; g__Hymenobacter; s__Hymenobacter coccineus	d__Bacteria; p__Bacteroidota; c__Bacteroidia; o__Cytophagales; f__Hymenobacteraceae; g__Hymenobacter; s__Hymenobacter coccineus	yes	1908235	yes	yes	0.0031	yes
GCA_900141805.1	Hymenobacter daecheongensis DSM 21074	d__Bacteria; p__Bacteroidetes; c__Cytophagia; o__Cytophagales; f__Hymenobacteraceae; g__Hymenobacter; s__Hymenobacter daecheongensis	d__Bacteria; p__Bacteroidota; c__Bacteroidia; o__Cytophagales; f__Hymenobacteraceae; g__Hymenobacter; s__Hymenobacter daecheongensis	yes	1121955	yes	yes	5e-06	yes
GCA_004745955.1	Hymenobacter elongatus	d__Bacteria; p__Bacteroidetes; c__Cytophagia; o__Cytophagales; f__Hymenobacteraceae; g__Hymenobacter; s__Hymenobacter elongatus	d__Bacteria; p__Bacteroidota; c__Bacteroidia; o__Cytophagales; f__Hymenobacteraceae; g__Hymenobacter; s__Hymenobacter elongatus	yes	877208	yes	yes	0.00013	yes
GCA_900187375.1	Hymenobacter gelipurpurascens	d__Bacteria; p__Bacteroidetes; c__Cytophagia; o__Cytophagales; f__Hymenobacteraceae; g__Hymenobacter; s__Hymenobacter gelipurpurascens	d__Bacteria; p__Bacteroidota; c__Bacteroidia; o__Cytophagales; f__Hymenobacteraceae; g__Hymenobacter; s__Hymenobacter gelipurpurascens	yes	89968	yes	yes	0.00078	yes
GCA_001816165.1	Hymenobacter glacialis	d__Bacteria; p__Bacteroidetes; c__Cytophagia; o__Cytophagales; f__Hymenobacteraceae; g__Hymenobacter; s__Hymenobacter glacialis	d__Bacteria; p__Bacteroidota; c__Bacteroidia; o__Cytophagales; f__Hymenobacteraceae; g__Hymenobacter; s__Hymenobacter glacialis	yes	1908236	yes	yes	0.00012	yes
GCA_001816145.1	Hymenobacter lapidarius	d__Bacteria; p__Bacteroidetes; c__Cytophagia; o__Cytophagales; f__Hymenobacteraceae; g__Hymenobacter; s__Hymenobacter lapidarius	d__Bacteria; p__Bacteroidota; c__Bacteroidia; o__Cytophagales; f__Hymenobacteraceae; g__Hymenobacter; s__Hymenobacter lapidarius	yes	1908237	yes	yes	0.00012	yes
GCA_900188255.1	Hymenobacter mucosus	d__Bacteria; p__Bacteroidetes; c__Cytophagia; o__Cytophagales; f__Hymenobacteraceae; g__Hymenobacter; s__Hymenobacter mucosus	d__Bacteria; p__Bacteroidota; c__Bacteroidia; o__Cytophagales; f__Hymenobacteraceae; g__Hymenobacter; s__Hymenobacter mucosus	yes	1411120	yes	yes	0.0012	yes
GCA_003149515.1	Hymenobacter nivis	d__Bacteria; p__Bacteroidetes; c__Cytophagia; o__Cytophagales; f__Hymenobacteraceae; g__Hymenobacter; s__Hymenobacter nivis	d__Bacteria; p__Bacteroidota; c__Bacteroidia; o__Cytophagales; f__Hymenobacteraceae; g__Hymenobacter; s__Hymenobacter nivis	yes	1850093	yes	yes	0.0031	yes
GCA_000420705.1	Hymenobacter norwichensis DSM 15439	d__Bacteria; p__Bacteroidetes; c__Cytophagia; o__Cytophagales; f__Hymenobacteraceae; g__Hymenobacter; s__Hymenobacter norwichensis	d__Bacteria; p__Bacteroidota; c__Bacteroidia; o__Cytophagales; f__Hymenobacteraceae; g__Hymenobacter; s__Hymenobacter norwichensis	no
GCA_003944765.1	Hymenobacter perfusus	d__Bacteria; p__Bacteroidetes; c__Cytophagia; o__Cytophagales; f__Hymenobacteraceae; g__Hymenobacter; s__Hymenobacter perfusus	d__Bacteria; p__Bacteroidota; c__Bacteroidia; o__Cytophagales; f__Hymenobacteraceae; g__Hymenobacter; s__Hymenobacter perfusus	yes	1236770	yes	yes	0.0007	yes
GCA_900107135.1	Hymenobacter psychrophilus	d__Bacteria; p__Bacteroidetes; c__Cytophagia; o__Cytophagales; f__Hymenobacteraceae; g__Hymenobacter; s__Hymenobacter psychrophilus	d__Bacteria; p__Bacteroidota; c__Bacteroidia; o__Cytophagales; f__Hymenobacteraceae; g__Hymenobacter; s__Hymenobacter psychrophilus	yes	651662	yes	yes	0.0016	yes
GCA_900142395.1	Hymenobacter psychrotolerans DSM 18569	d__Bacteria; p__Bacteroidetes; c__Cytophagia; o__Cytophagales; f__Hymenobacteraceae; g__Hymenobacter; s__Hymenobacter psychrotolerans	d__Bacteria; p__Bacteroidota; c__Bacteroidia; o__Cytophagales; f__Hymenobacteraceae; g__Hymenobacter; s__Hymenobacter psychrotolerans	yes	1121959	yes	yes	0.0019	yes
GCA_003944715.1	Hymenobacter rigui	d__Bacteria; p__Bacteroidetes; c__Cytophagia; o__Cytophagales; f__Hymenobacteraceae; g__Hymenobacter; s__Hymenobacter rigui	d__Bacteria; p__Bacteroidota; c__Bacteroidia; o__Cytophagales; f__Hymenobacteraceae; g__Hymenobacter; s__Hymenobacter rigui	yes	334424	yes	yes	5.7e-06	yes
GCA_900176135.1	Hymenobacter roseosalivarius DSM 11622	d__Bacteria; p__Bacteroidetes; c__Cytophagia; o__Cytophagales; f__Hymenobacteraceae; g__Hymenobacter; s__Hymenobacter roseosalivarius	d__Bacteria; p__Bacteroidota; c__Bacteroidia; o__Cytophagales; f__Hymenobacteraceae; g__Hymenobacter; s__Hymenobacter roseosalivarius	yes	645990	yes	yes	0.00043	yes
GCA_001507645.1	Hymenobacter sedentarius	d__Bacteria; p__Bacteroidetes; c__Cytophagia; o__Cytophagales; f__Hymenobacteraceae; g__Hymenobacter; s__Hymenobacter sedentarius	d__Bacteria; p__Bacteroidota; c__Bacteroidia; o__Cytophagales; f__Hymenobacteraceae; g__Hymenobacter; s__Hymenobacter sedentarius	yes	1411621	yes	yes	0.00012	yes
GCA_000576555.1	Hymenobacter swuensis DY53	d__Bacteria; p__Bacteroidetes; c__Cytophagia; o__Cytophagales; f__Hymenobacteraceae; g__Hymenobacter; s__Hymenobacter swuensis	d__Bacteria; p__Bacteroidota; c__Bacteroidia; o__Cytophagales; f__Hymenobacteraceae; g__Hymenobacter; s__Hymenobacter swuensis	yes	1227739	yes	yes	0.00014	yes
GCA_000972495.1	Hymenobacter terrenus	d__Bacteria; p__Bacteroidetes; c__Cytophagia; o__Cytophagales; f__Hymenobacteraceae; g__Hymenobacter; s__Hymenobacter terrenus	d__Bacteria; p__Bacteroidota; c__Bacteroidia; o__Cytophagales; f__Hymenobacteraceae; g__Hymenobacter; s__Hymenobacter terrenus	no
GCA_004745865.1	Hymenobacter wooponensis	d__Bacteria; p__Bacteroidetes; c__Cytophagia; o__Cytophagales; f__Hymenobacteraceae; g__Hymenobacter; s__Hymenobacter wooponensis	d__Bacteria; p__Bacteroidota; c__Bacteroidia; o__Cytophagales; f__Hymenobacteraceae; g__Hymenobacter; s__Hymenobacter wooponensis	yes	1525360	yes	yes	0.00098	yes
GCA_003585765.1	Pontibacter actiniarum	d__Bacteria; p__Bacteroidetes; c__Cytophagia; o__Cytophagales; f__Hymenobacteraceae; g__Pontibacter; s__Pontibacter actiniarum	d__Bacteria; p__Bacteroidota; c__Bacteroidia; o__Cytophagales; f__Hymenobacteraceae; g__Pontibacter; s__Pontibacter actiniarum	yes	323450	yes	yes	2.7e-05	yes
GCA_001611675.1	Pontibacter akesuensis	d__Bacteria; p__Bacteroidetes; c__Cytophagia; o__Cytophagales; f__Hymenobacteraceae; g__Pontibacter; s__Pontibacter akesuensis	d__Bacteria; p__Bacteroidota; c__Bacteroidia; o__Cytophagales; f__Hymenobacteraceae; g__Pontibacter; s__Pontibacter akesuensis	no
GCA_900113285.1	Pontibacter chinhatensis	d__Bacteria; p__Bacteroidetes; c__Cytophagia; o__Cytophagales; f__Hymenobacteraceae; g__Pontibacter; s__Pontibacter chinhatensis	d__Bacteria; p__Bacteroidota; c__Bacteroidia; o__Cytophagales; f__Hymenobacteraceae; g__Pontibacter; s__Pontibacter chinhatensis	yes	1436961	yes	yes	0.00012	yes
GCA_003367245.1	Pontibacter diazotrophicus	d__Bacteria; p__Bacteroidetes; c__Cytophagia; o__Cytophagales; f__Hymenobacteraceae; g__Pontibacter; s__Pontibacter diazotrophicus	d__Bacteria; p__Bacteroidota; c__Bacteroidia; o__Cytophagales; f__Hymenobacteraceae; g__Pontibacter; s__Pontibacter diazotrophicus	yes	1400979	no
GCA_900156345.1	Pontibacter indicus	d__Bacteria; p__Bacteroidetes; c__Cytophagia; o__Cytophagales; f__Hymenobacteraceae; g__Pontibacter; s__Pontibacter indicus	d__Bacteria; p__Bacteroidota; c__Bacteroidia; o__Cytophagales; f__Hymenobacteraceae; g__Pontibacter; s__Pontibacter indicus	yes	1317125	yes	yes	0.0005	yes
GCA_000973725.1	Pontibacter korlensis	d__Bacteria; p__Bacteroidetes; c__Cytophagia; o__Cytophagales; f__Hymenobacteraceae; g__Pontibacter; s__Pontibacter korlensis	d__Bacteria; p__Bacteroidota; c__Bacteroidia; o__Cytophagales; f__Hymenobacteraceae; g__Pontibacter; s__Pontibacter korlensis	yes	400092	yes	yes	8.9e-06	yes
GCA_900156415.1	Pontibacter lucknowensis	d__Bacteria; p__Bacteroidetes; c__Cytophagia; o__Cytophagales; f__Hymenobacteraceae; g__Pontibacter; s__Pontibacter lucknowensis	d__Bacteria; p__Bacteroidota; c__Bacteroidia; o__Cytophagales; f__Hymenobacteraceae; g__Pontibacter; s__Pontibacter lucknowensis	yes	1077936	yes	yes	4.2e-07	yes
GCA_003054055.1	Pontibacter mucosus	d__Bacteria; p__Bacteroidetes; c__Cytophagia; o__Cytophagales; f__Hymenobacteraceae; g__Pontibacter; s__Pontibacter mucosus	d__Bacteria; p__Bacteroidota; c__Bacteroidia; o__Cytophagales; f__Hymenobacteraceae; g__Pontibacter; s__Pontibacter mucosus	yes	1649266	yes	yes	3e-05	yes
GCA_002846395.1	Pontibacter ramchanderi	d__Bacteria; p__Bacteroidetes; c__Cytophagia; o__Cytophagales; f__Hymenobacteraceae; g__Pontibacter; s__Pontibacter ramchanderi	d__Bacteria; p__Bacteroidota; c__Bacteroidia; o__Cytophagales; f__Hymenobacteraceae; g__Pontibacter; s__Pontibacter ramchanderi	yes	1179743	yes	yes	3.4e-05	yes
GCA_000373265.1	Pontibacter roseus DSM 17521	d__Bacteria; p__Bacteroidetes; c__Cytophagia; o__Cytophagales; f__Hymenobacteraceae; g__Pontibacter; s__Pontibacter roseus	d__Bacteria; p__Bacteroidota; c__Bacteroidia; o__Cytophagales; f__Hymenobacteraceae; g__Pontibacter; s__Pontibacter roseus	no
GCA_003347595.2	Hymenobacteraceae bacterium SYSU D60016	d__Bacteria; p__Bacteroidetes; c__Cytophagia; o__Cytophagales; f__Hymenobacteraceae; g__; s__	d__Bacteria; p__Bacteroidota; c__Bacteroidia; o__Cytophagales; f__Hymenobacteraceae; g__Pontibacter; s__Pontibacter sp003347595	no
GCA_900188175.1	Pontibacter ummariensis	d__Bacteria; p__Bacteroidetes; c__Cytophagia; o__Cytophagales; f__Hymenobacteraceae; g__Pontibacter; s__Pontibacter ummariensis	d__Bacteria; p__Bacteroidota; c__Bacteroidia; o__Cytophagales; f__Hymenobacteraceae; g__Pontibacter; s__Pontibacter ummariensis	yes	1610492	yes	yes	1.2e-05	yes
GCA_003096355.1	Pontibacter virosus	d__Bacteria; p__Bacteroidetes; c__Cytophagia; o__Cytophagales; f__Hymenobacteraceae; g__Pontibacter; s__Pontibacter virosus	d__Bacteria; p__Bacteroidota; c__Bacteroidia; o__Cytophagales; f__Hymenobacteraceae; g__Pontibacter; s__Pontibacter virosus	yes	1765052	yes	yes	2.1e-06	yes
GCA_003721565.1	Rufibacter immobilis	d__Bacteria; p__Bacteroidetes; c__Cytophagia; o__Cytophagales; f__Hymenobacteraceae; g__Rufibacter; s__Rufibacter immobilis	d__Bacteria; p__Bacteroidota; c__Bacteroidia; o__Cytophagales; f__Hymenobacteraceae; g__Rufibacter; s__Rufibacter immobilis	yes	1348778	no
GCA_001647275.1	Rufibacter ruber	d__Bacteria; p__Bacteroidetes; c__Cytophagia; o__Cytophagales; f__Hymenobacteraceae; g__Rufibacter; s__Rufibacter ruber	d__Bacteria; p__Bacteroidota; c__Bacteroidia; o__Cytophagales; f__Hymenobacteraceae; g__Rufibacter; s__Rufibacter ruber	no
GCA_001310085.1	Rufibacter tibetensis	d__Bacteria; p__Bacteroidetes; c__Cytophagia; o__Cytophagales; f__Hymenobacteraceae; g__Rufibacter; s__Rufibacter tibetensis	d__Bacteria; p__Bacteroidota; c__Bacteroidia; o__Cytophagales; f__Hymenobacteraceae; g__Rufibacter; s__Rufibacter tibetensis	yes	512763	yes	yes	9.5e-06	yes
GCA_003970915.1	Hymenobacter gummosus	d__Bacteria; p__Bacteroidetes; c__Cytophagia; o__Cytophagales; f__Hymenobacteraceae; g__Hymenobacter; s__Hymenobacter gummosus	d__Bacteria; p__Bacteroidota; c__Bacteroidia; o__Cytophagales; f__Hymenobacteraceae; g__Solirubrum; s__Solirubrum gummosus	yes	1776032	yes	yes	0.0011	yes
GCA_005771675.1	Hymenobacter jeollabukensis	d__Bacteria; p__Bacteroidetes; c__Cytophagia; o__Cytophagales; f__Hymenobacteraceae; g__Hymenobacter; s__Hymenobacter jeollabukensis	d__Bacteria; p__Bacteroidota; c__Bacteroidia; o__Cytophagales; f__Hymenobacteraceae; g__Solirubrum; s__Solirubrum jeollabukensis	yes	2025313	yes	yes	2.1e-05	yes
GCA_000430505.1	Eisenibacter elegans DSM 3317	d__Bacteria; p__Bacteroidetes; c__Cytophagia; o__Cytophagales; f__Microscillaceae; g__Eisenibacter; s__Eisenibacter elegans	d__Bacteria; p__Bacteroidota; c__Bacteroidia; o__Cytophagales; f__Microscillaceae; g__Eisenibacter; s__Eisenibacter elegans	no
GCA_000169175.1	Microscilla marina ATCC 23134	d__Bacteria; p__Bacteroidetes; c__Cytophagia; o__Cytophagales; f__Microscillaceae; g__Microscilla; s__Microscilla marina	d__Bacteria; p__Bacteroidota; c__Bacteroidia; o__Cytophagales; f__Microscillaceae; g__Microscilla; s__Microscilla marina	yes	313606	yes	yes	0.0017	yes
GCA_003148625.1	Arcicella aurantiaca	d__Bacteria; p__Bacteroidetes; c__Cytophagia; o__Cytophagales; f__Cytophagaceae; g__Arcicella; s__Arcicella aurantiaca	d__Bacteria; p__Bacteroidota; c__Bacteroidia; o__Cytophagales; f__Spirosomaceae; g__Arcicella; s__Arcicella aurantiaca	yes	591202	yes	yes	0.001	yes
GCA_003258705.1	Arcticibacterium luteifluviistationis	d__Bacteria; p__Bacteroidetes; c__Cytophagia; o__Cytophagales; f__Cytophagaceae; g__Arcticibacterium; s__Arcticibacterium luteifluviistationis	d__Bacteria; p__Bacteroidota; c__Bacteroidia; o__Cytophagales; f__Spirosomaceae; g__Arcticibacterium; s__Arcticibacterium luteifluviistationis	yes	1784714	yes	yes	0.00061	yes
GCA_001870735.1	Arsenicibacter rosenii	d__Bacteria; p__Bacteroidetes; c__Cytophagia; o__Cytophagales; f__Cytophagaceae; g__Arsenicibacter; s__Arsenicibacter rosenii	d__Bacteria; p__Bacteroidota; c__Bacteroidia; o__Cytophagales; f__Spirosomaceae; g__Arsenicibacter; s__Arsenicibacter rosenii	yes	1750698	yes	yes	2.1e-05	yes
GCA_000428845.1	Dyadobacter alkalitolerans DSM 23607	d__Bacteria; p__Bacteroidetes; c__Cytophagia; o__Cytophagales; f__Cytophagaceae; g__Dyadobacter; s__Dyadobacter alkalitolerans	d__Bacteria; p__Bacteroidota; c__Bacteroidia; o__Cytophagales; f__Spirosomaceae; g__Dyadobacter; s__Dyadobacter alkalitolerans	no
GCA_000382205.1	Dyadobacter beijingensis DSM 21582	d__Bacteria; p__Bacteroidetes; c__Cytophagia; o__Cytophagales; f__Cytophagaceae; g__Dyadobacter; s__Dyadobacter beijingensis	d__Bacteria; p__Bacteroidota; c__Bacteroidia; o__Cytophagales; f__Spirosomaceae; g__Dyadobacter; s__Dyadobacter beijingensis	no
GCA_000701505.1	Dyadobacter crusticola DSM 16708	d__Bacteria; p__Bacteroidetes; c__Cytophagia; o__Cytophagales; f__Cytophagaceae; g__Dyadobacter; s__Dyadobacter crusticola	d__Bacteria; p__Bacteroidota; c__Bacteroidia; o__Cytophagales; f__Spirosomaceae; g__Dyadobacter; s__Dyadobacter crusticola	no
GCA_000023125.1	Dyadobacter fermentans DSM 18053	d__Bacteria; p__Bacteroidetes; c__Cytophagia; o__Cytophagales; f__Cytophagaceae; g__Dyadobacter; s__Dyadobacter fermentans	d__Bacteria; p__Bacteroidota; c__Bacteroidia; o__Cytophagales; f__Spirosomaceae; g__Dyadobacter; s__Dyadobacter fermentans	yes	471854	yes	yes	2.5e-05	yes
GCA_003149085.1	Dyadobacter jejuensis	d__Bacteria; p__Bacteroidetes; c__Cytophagia; o__Cytophagales; f__Cytophagaceae; g__Dyadobacter; s__Dyadobacter jejuensis	d__Bacteria; p__Bacteroidota; c__Bacteroidia; o__Cytophagales; f__Spirosomaceae; g__Dyadobacter; s__Dyadobacter jejuensis	yes	1082580	yes	yes	4.8e-05	yes
GCA_003014695.1	Dyadobacter jiangsuensis	d__Bacteria; p__Bacteroidetes; c__Cytophagia; o__Cytophagales; f__Cytophagaceae; g__Dyadobacter; s__Dyadobacter jiangsuensis	d__Bacteria; p__Bacteroidota; c__Bacteroidia; o__Cytophagales; f__Spirosomaceae; g__Dyadobacter; s__Dyadobacter jiangsuensis	yes	1591085	yes	yes	2.5e-05	yes
GCA_900108855.1	Dyadobacter koreensis	d__Bacteria; p__Bacteroidetes; c__Cytophagia; o__Cytophagales; f__Cytophagaceae; g__Dyadobacter; s__Dyadobacter koreensis	d__Bacteria; p__Bacteroidota; c__Bacteroidia; o__Cytophagales; f__Spirosomaceae; g__Dyadobacter; s__Dyadobacter koreensis	yes	408657	yes	yes	3.5e-05	yes
GCA_005860805.1	Dyadobacter luticola	d__Bacteria; p__Bacteroidetes; c__Cytophagia; o__Cytophagales; f__Cytophagaceae; g__Dyadobacter; s__Dyadobacter luticola	d__Bacteria; p__Bacteroidota; c__Bacteroidia; o__Cytophagales; f__Spirosomaceae; g__Dyadobacter; s__Dyadobacter luticola	yes	1979387	yes	yes	7e-05	yes
GCA_900167945.1	Dyadobacter psychrophilus	d__Bacteria; p__Bacteroidetes; c__Cytophagia; o__Cytophagales; f__Cytophagaceae; g__Dyadobacter; s__Dyadobacter psychrophilus	d__Bacteria; p__Bacteroidota; c__Bacteroidia; o__Cytophagales; f__Spirosomaceae; g__Dyadobacter; s__Dyadobacter psychrophilus	yes	651661	yes	yes	4.1e-05	yes
GCA_005860765.1	Dyadobacter sediminis	d__Bacteria; p__Bacteroidetes; c__Cytophagia; o__Cytophagales; f__Cytophagaceae; g__Dyadobacter; s__Dyadobacter sediminis	d__Bacteria; p__Bacteroidota; c__Bacteroidia; o__Cytophagales; f__Spirosomaceae; g__Dyadobacter; s__Dyadobacter sediminis	yes	1493691	yes	yes	7e-05	yes
GCA_900101885.1	Dyadobacter soli	d__Bacteria; p__Bacteroidetes; c__Cytophagia; o__Cytophagales; f__Cytophagaceae; g__Dyadobacter; s__Dyadobacter soli	d__Bacteria; p__Bacteroidota; c__Bacteroidia; o__Cytophagales; f__Spirosomaceae; g__Dyadobacter; s__Dyadobacter soli	yes	659014	yes	yes	2.5e-05	yes
GCA_000566685.1	Dyadobacter tibetensis Y620-1	d__Bacteria; p__Bacteroidetes; c__Cytophagia; o__Cytophagales; f__Cytophagaceae; g__Dyadobacter; s__Dyadobacter tibetensis	d__Bacteria; p__Bacteroidota; c__Bacteroidia; o__Cytophagales; f__Spirosomaceae; g__Dyadobacter; s__Dyadobacter tibetensis	no
GCA_000263195.1	Emticicia oligotrophica DSM 17448	d__Bacteria; p__Bacteroidetes; c__Cytophagia; o__Cytophagales; f__Cytophagaceae; g__Emticicia; s__Emticicia oligotrophica	d__Bacteria; p__Bacteroidota; c__Bacteroidia; o__Cytophagales; f__Spirosomaceae; g__Emticicia; s__Emticicia oligotrophica	yes	929562	yes	yes	4.4e-07	yes
GCA_000331105.1	Fibrella aestuarina BUZ 2	d__Bacteria; p__Bacteroidetes; c__Cytophagia; o__Cytophagales; f__Cytophagaceae; g__Fibrella; s__Fibrella aestuarina	d__Bacteria; p__Bacteroidota; c__Bacteroidia; o__Cytophagales; f__Spirosomaceae; g__Fibrella; s__Fibrella aestuarina	yes	1166018	yes	no		no
GCA_000296815.2	Fibrisoma limi BUZ 3	d__Bacteria; p__Bacteroidetes; c__Cytophagia; o__Cytophagales; f__Cytophagaceae; g__Fibrisoma; s__Fibrisoma limi	d__Bacteria; p__Bacteroidota; c__Bacteroidia; o__Cytophagales; f__Spirosomaceae; g__Fibrisoma; s__Fibrisoma limi	yes	1185876	yes	yes	3.2e-06	yes
GCA_000427405.1	Flectobacillus major DSM 103	d__Bacteria; p__Bacteroidetes; c__Cytophagia; o__Cytophagales; f__Cytophagaceae; g__Flectobacillus; s__Flectobacillus major	d__Bacteria; p__Bacteroidota; c__Bacteroidia; o__Cytophagales; f__Spirosomaceae; g__Flectobacillus; s__Flectobacillus major	no
GCA_001306455.1	Jiulongibacter sediminis	d__Bacteria; p__Bacteroidetes; c__Cytophagia; o__Cytophagales; f__Cytophagaceae; g__Jiulongibacter; s__Jiulongibacter sediminis	d__Bacteria; p__Bacteroidota; c__Bacteroidia; o__Cytophagales; f__Spirosomaceae; g__Jiulongibacter; s__Jiulongibacter sediminis	yes	1605367	yes	yes	2.9e-05	yes
GCA_003259745.1	Larkinella arboricola	d__Bacteria; p__Bacteroidetes; c__Cytophagia; o__Cytophagales; f__Cytophagaceae; g__Larkinella; s__Larkinella arboricola	d__Bacteria; p__Bacteroidota; c__Bacteroidia; o__Cytophagales; f__Spirosomaceae; g__Larkinella; s__Larkinella arboricola	yes	643671	yes	yes	0.00049	yes
GCA_003858645.1	Larkinella knui	d__Bacteria; p__Bacteroidetes; c__Cytophagia; o__Cytophagales; f__Cytophagaceae; g__Larkinella; s__Larkinella knui	d__Bacteria; p__Bacteroidota; c__Bacteroidia; o__Cytophagales; f__Spirosomaceae; g__Larkinella; s__Larkinella knui	yes	2025310	yes	yes	0.00075	yes
GCA_003858635.1	Larkinella rosea	d__Bacteria; p__Bacteroidetes; c__Cytophagia; o__Cytophagales; f__Cytophagaceae; g__Larkinella; s__Larkinella rosea	d__Bacteria; p__Bacteroidota; c__Bacteroidia; o__Cytophagales; f__Spirosomaceae; g__Larkinella; s__Larkinella rosea	yes	2025312	yes	yes	0.00075	yes
GCA_003703975.1	Larkinella soli	d__Bacteria; p__Bacteroidetes; c__Cytophagia; o__Cytophagales; f__Cytophagaceae; g__Larkinella; s__Larkinella soli	d__Bacteria; p__Bacteroidota; c__Bacteroidia; o__Cytophagales; f__Spirosomaceae; g__Larkinella; s__Larkinella soli	no
GCA_000166395.1	Leadbetterella byssophila DSM 17132	d__Bacteria; p__Bacteroidetes; c__Cytophagia; o__Cytophagales; f__Cytophagaceae; g__Leadbetterella; s__Leadbetterella byssophila	d__Bacteria; p__Bacteroidota; c__Bacteroidia; o__Cytophagales; f__Spirosomaceae; g__Leadbetterella; s__Leadbetterella byssophila	yes	649349	yes	yes	2.9e-05	yes
GCA_000383955.1	Rudanella lutea DSM 19387	d__Bacteria; p__Bacteroidetes; c__Cytophagia; o__Cytophagales; f__Cytophagaceae; g__Rudanella; s__Rudanella lutea	d__Bacteria; p__Bacteroidota; c__Bacteroidia; o__Cytophagales; f__Spirosomaceae; g__Rudanella; s__Rudanella lutea	no
GCA_000482465.1	Runella limosa DSM 17973	d__Bacteria; p__Bacteroidetes; c__Cytophagia; o__Cytophagales; f__Cytophagaceae; g__Runella; s__Runella limosa	d__Bacteria; p__Bacteroidota; c__Bacteroidia; o__Cytophagales; f__Spirosomaceae; g__Runella; s__Runella limosa	no
GCA_000218895.1	Runella slithyformis DSM 19594	d__Bacteria; p__Bacteroidetes; c__Cytophagia; o__Cytophagales; f__Cytophagaceae; g__Runella; s__Runella slithyformis	d__Bacteria; p__Bacteroidota; c__Bacteroidia; o__Cytophagales; f__Spirosomaceae; g__Runella; s__Runella slithyformis	yes	761193	yes	yes	1.1e-06	yes
GCA_000423565.1	Runella zeae DSM 19591	d__Bacteria; p__Bacteroidetes; c__Cytophagia; o__Cytophagales; f__Cytophagaceae; g__Runella; s__Runella zeae	d__Bacteria; p__Bacteroidota; c__Bacteroidia; o__Cytophagales; f__Spirosomaceae; g__Runella; s__Runella zeae	no
GCA_900103285.1	Siphonobacter aquaeclarae	d__Bacteria; p__Bacteroidetes; c__Cytophagia; o__Cytophagales; f__Cytophagaceae; g__Siphonobacter; s__Siphonobacter aquaeclarae	d__Bacteria; p__Bacteroidota; c__Bacteroidia; o__Cytophagales; f__Spirosomaceae; g__Siphonobacter; s__Siphonobacter aquaeclarae	yes	563176	yes	yes	0.00014	yes
GCA_002943425.1	Siphonobacter curvatus	d__Bacteria; p__Bacteroidetes; c__Cytophagia; o__Cytophagales; f__Cytophagaceae; g__Siphonobacter; s__Siphonobacter curvatus	d__Bacteria; p__Bacteroidota; c__Bacteroidia; o__Cytophagales; f__Spirosomaceae; g__Siphonobacter; s__Siphonobacter curvatus	yes	2094562	yes	yes	5.9e-05	yes
GCA_002056795.1	Spirosoma aerolatum	d__Bacteria; p__Bacteroidetes; c__Cytophagia; o__Cytophagales; f__Cytophagaceae; g__Spirosoma; s__Spirosoma aerolatum	d__Bacteria; p__Bacteroidota; c__Bacteroidia; o__Cytophagales; f__Spirosomaceae; g__Spirosoma; s__Spirosoma aerolatum	no
GCA_900112365.1	Spirosoma endophyticum	d__Bacteria; p__Bacteroidetes; c__Cytophagia; o__Cytophagales; f__Cytophagaceae; g__Spirosoma; s__Spirosoma endophyticum	d__Bacteria; p__Bacteroidota; c__Bacteroidia; o__Cytophagales; f__Spirosomaceae; g__Spirosoma; s__Spirosoma endophyticum	yes	662367	yes	yes	3.6e-06	yes
GCA_900230225.1	Spirosoma fluviale	d__Bacteria; p__Bacteroidetes; c__Cytophagia; o__Cytophagales; f__Cytophagaceae; g__Spirosoma; s__Spirosoma fluviale	d__Bacteria; p__Bacteroidota; c__Bacteroidia; o__Cytophagales; f__Spirosomaceae; g__Spirosoma; s__Spirosoma fluviale	yes	1597977	yes	yes	3.6e-06	yes
GCA_005870035.1	Spirosoma lacussanchae	d__Bacteria; p__Bacteroidetes; c__Cytophagia; o__Cytophagales; f__Cytophagaceae; g__Spirosoma; s__Spirosoma lacussanchae	d__Bacteria; p__Bacteroidota; c__Bacteroidia; o__Cytophagales; f__Spirosomaceae; g__Spirosoma; s__Spirosoma lacussanchae	no
GCA_000024525.1	Spirosoma linguale DSM 74	d__Bacteria; p__Bacteroidetes; c__Cytophagia; o__Cytophagales; f__Cytophagaceae; g__Spirosoma; s__Spirosoma linguale	d__Bacteria; p__Bacteroidota; c__Bacteroidia; o__Cytophagales; f__Spirosomaceae; g__Spirosoma; s__Spirosoma linguale	yes	504472	yes	yes	7.3e-06	yes
GCA_000374065.1	Spirosoma luteum DSM 19990	d__Bacteria; p__Bacteroidetes; c__Cytophagia; o__Cytophagales; f__Cytophagaceae; g__Spirosoma; s__Spirosoma luteum	d__Bacteria; p__Bacteroidota; c__Bacteroidia; o__Cytophagales; f__Spirosomaceae; g__Spirosoma; s__Spirosoma luteum	no
GCA_001988955.1	Spirosoma montaniterrae	d__Bacteria; p__Bacteroidetes; c__Cytophagia; o__Cytophagales; f__Cytophagaceae; g__Spirosoma; s__Spirosoma montaniterrae	d__Bacteria; p__Bacteroidota; c__Bacteroidia; o__Cytophagales; f__Spirosomaceae; g__Spirosoma; s__Spirosoma montaniterrae	yes	1178516	yes	yes	2.3e-05	yes
GCA_003002825.1	Spirosoma oryzae	d__Bacteria; p__Bacteroidetes; c__Cytophagia; o__Cytophagales; f__Cytophagaceae; g__Spirosoma; s__Spirosoma oryzae	d__Bacteria; p__Bacteroidota; c__Bacteroidia; o__Cytophagales; f__Spirosomaceae; g__Spirosoma; s__Spirosoma oryzae	yes	1469603	yes	yes	3.6e-06	yes
GCA_000374025.1	Spirosoma panaciterrae DSM 21099	d__Bacteria; p__Bacteroidetes; c__Cytophagia; o__Cytophagales; f__Cytophagaceae; g__Spirosoma; s__Spirosoma panaciterrae	d__Bacteria; p__Bacteroidota; c__Bacteroidia; o__Cytophagales; f__Spirosomaceae; g__Spirosoma; s__Spirosoma panaciterrae	no
GCA_002831565.1	Spirosoma pollinicola	d__Bacteria; p__Bacteroidetes; c__Cytophagia; o__Cytophagales; f__Cytophagaceae; g__Spirosoma; s__Spirosoma pollinicola	d__Bacteria; p__Bacteroidota; c__Bacteroidia; o__Cytophagales; f__Spirosomaceae; g__Spirosoma; s__Spirosoma pollinicola	yes	2057025	yes	yes	3.6e-06	yes
GCA_000974425.1	Spirosoma radiotolerans	d__Bacteria; p__Bacteroidetes; c__Cytophagia; o__Cytophagales; f__Cytophagaceae; g__Spirosoma; s__Spirosoma radiotolerans	d__Bacteria; p__Bacteroidota; c__Bacteroidia; o__Cytophagales; f__Spirosomaceae; g__Spirosoma; s__Spirosoma radiotolerans	yes	1379870	yes	yes	3.6e-06	yes
GCA_002067135.1	Spirosoma rigui	d__Bacteria; p__Bacteroidetes; c__Cytophagia; o__Cytophagales; f__Cytophagaceae; g__Spirosoma; s__Spirosoma rigui	d__Bacteria; p__Bacteroidota; c__Bacteroidia; o__Cytophagales; f__Spirosomaceae; g__Spirosoma; s__Spirosoma rigui	no
GCA_000374085.1	Spirosoma spitsbergense DSM 19989	d__Bacteria; p__Bacteroidetes; c__Cytophagia; o__Cytophagales; f__Cytophagaceae; g__Spirosoma; s__Spirosoma spitsbergense	d__Bacteria; p__Bacteroidota; c__Bacteroidia; o__Cytophagales; f__Spirosomaceae; g__Spirosoma; s__Spirosoma spitsbergense	no
GCA_002843425.1	Raineya orbicola	d__Bacteria; p__Bacteroidetes; c__Cytophagia; o__Cytophagales; f__Raineyaceae; g__Raineya; s__Raineya orbicola	d__Bacteria; p__Bacteroidota; c__Bacteroidia; o__Cytophagales; f__Thermonemataceae; g__Raineya; s__Raineya orbicola	yes	2016530	yes	yes	0.0015	yes
GCA_000426825.1	Thermonema rossianum DSM 10300	d__Bacteria; p__Bacteroidetes; c__Cytophagia; o__Cytophagales; f__Thermonemataceae; g__Thermonema; s__Thermonema rossianum	d__Bacteria; p__Bacteroidota; c__Bacteroidia; o__Cytophagales; f__Thermonemataceae; g__Thermonema; s__Thermonema rossianum	no
GCA_003402975.1	Brumimicrobium aurantiacum	d__Bacteria; p__Bacteroidetes; c__Flavobacteriia; o__Flavobacteriales; f__Crocinitomicaceae; g__Brumimicrobium; s__Brumimicrobium aurantiacum	d__Bacteria; p__Bacteroidota; c__Bacteroidia; o__Flavobacteriales; f__Crocinitomicaceae; g__Brumimicrobium; s__Brumimicrobium aurantiacum	yes	1737063	yes	no		no
GCA_004152935.1	Brumimicrobium glaciale	d__Bacteria; p__Bacteroidetes; c__Flavobacteriia; o__Flavobacteriales; f__Crocinitomicaceae; g__Brumimicrobium; s__Brumimicrobium glaciale	d__Bacteria; p__Bacteroidota; c__Bacteroidia; o__Flavobacteriales; f__Crocinitomicaceae; g__Brumimicrobium; s__Brumimicrobium glaciale	yes	200475	yes	no		no
GCA_003025005.1	Brumimicrobium mesophilum	d__Bacteria; p__Bacteroidetes; c__Flavobacteriia; o__Flavobacteriales; f__Crocinitomicaceae; g__Brumimicrobium; s__Brumimicrobium mesophilum	d__Bacteria; p__Bacteroidota; c__Bacteroidia; o__Flavobacteriales; f__Crocinitomicaceae; g__Brumimicrobium; s__Brumimicrobium mesophilum	no
GCA_002844555.1	Brumimicrobium salinarum	d__Bacteria; p__Bacteroidetes; c__Flavobacteriia; o__Flavobacteriales; f__Crocinitomicaceae; g__Brumimicrobium; s__Brumimicrobium salinarum	d__Bacteria; p__Bacteroidota; c__Bacteroidia; o__Flavobacteriales; f__Crocinitomicaceae; g__Brumimicrobium; s__Brumimicrobium salinarum	yes	2058658	yes	no		no
GCA_001661595.2	Crocinitomix algicola	d__Bacteria; p__Bacteroidetes; c__Flavobacteriia; o__Flavobacteriales; f__Crocinitomicaceae; g__Crocinitomix; s__Crocinitomix algicola	d__Bacteria; p__Bacteroidota; c__Bacteroidia; o__Flavobacteriales; f__Crocinitomicaceae; g__Crocinitomix; s__Crocinitomix algicola	no
GCA_000621625.1	Crocinitomix catalasitica ATCC 23190	d__Bacteria; p__Bacteroidetes; c__Flavobacteriia; o__Flavobacteriales; f__Crocinitomicaceae; g__Crocinitomix; s__Crocinitomix catalasitica	d__Bacteria; p__Bacteroidota; c__Bacteroidia; o__Flavobacteriales; f__Crocinitomicaceae; g__Crocinitomix; s__Crocinitomix catalasitica	no
GCA_000194605.1	Fluviicola taffensis DSM 16823	d__Bacteria; p__Bacteroidetes; c__Flavobacteriia; o__Flavobacteriales; f__Crocinitomicaceae; g__Fluviicola; s__Fluviicola taffensis	d__Bacteria; p__Bacteroidota; c__Bacteroidia; o__Flavobacteriales; f__Crocinitomicaceae; g__Fluviicola; s__Fluviicola taffensis	yes	755732	yes	no		no
GCA_900116425.1	Lishizhenia tianjinensis	d__Bacteria; p__Bacteroidetes; c__Flavobacteriia; o__Flavobacteriales; f__Crocinitomicaceae; g__Lishizhenia; s__Lishizhenia tianjinensis	d__Bacteria; p__Bacteroidota; c__Bacteroidia; o__Flavobacteriales; f__Crocinitomicaceae; g__Lishizhenia; s__Lishizhenia tianjinensis	yes	477690	yes	no		no
GCA_001573155.1	Vitellibacter aquimaris	d__Bacteria; p__Bacteroidetes; c__Flavobacteriia; o__Flavobacteriales; f__Flavobacteriaceae; g__Aequorivita; s__Vitellibacter aquimaris	d__Bacteria; p__Bacteroidota; c__Bacteroidia; o__Flavobacteriales; f__Flavobacteriaceae; g__Aequorivita; s__Aequorivita aquimaris	yes	1548749	yes	yes	0.00065	yes
GCA_000429125.1	Aequorivita capsosiphonis DSM 23843	d__Bacteria; p__Bacteroidetes; c__Flavobacteriia; o__Flavobacteriales; f__Flavobacteriaceae; g__Aequorivita; s__Aequorivita capsosiphonis	d__Bacteria; p__Bacteroidota; c__Bacteroidia; o__Flavobacteriales; f__Flavobacteriaceae; g__Aequorivita; s__Aequorivita capsosiphonis	no
GCA_001641085.1	Aequorivita soesokkakensis	d__Bacteria; p__Bacteroidetes; c__Flavobacteriia; o__Flavobacteriales; f__Flavobacteriaceae; g__Aequorivita; s__Aequorivita soesokkakensis	d__Bacteria; p__Bacteroidota; c__Bacteroidia; o__Flavobacteriales; f__Flavobacteriaceae; g__Aequorivita; s__Aequorivita soesokkakensis	yes	1385699	yes	yes	1.7e-05	yes
GCA_000265385.1	Aequorivita sublithincola DSM 14238	d__Bacteria; p__Bacteroidetes; c__Flavobacteriia; o__Flavobacteriales; f__Flavobacteriaceae; g__Aequorivita; s__Aequorivita sublithincola	d__Bacteria; p__Bacteroidota; c__Bacteroidia; o__Flavobacteriales; f__Flavobacteriaceae; g__Aequorivita; s__Aequorivita sublithincola	yes	746697	yes	yes	0.00065	yes
GCA_900106795.1	Aequorivita viscosa	d__Bacteria; p__Bacteroidetes; c__Flavobacteriia; o__Flavobacteriales; f__Flavobacteriaceae; g__Aequorivita; s__Aequorivita viscosa	d__Bacteria; p__Bacteroidota; c__Bacteroidia; o__Flavobacteriales; f__Flavobacteriaceae; g__Aequorivita; s__Aequorivita viscosa	no
GCA_000952855.1	Aequorivita vladivostokensis	d__Bacteria; p__Bacteroidetes; c__Flavobacteriia; o__Flavobacteriales; f__Flavobacteriaceae; g__Aequorivita; s__Aequorivita vladivostokensis	d__Bacteria; p__Bacteroidota; c__Bacteroidia; o__Flavobacteriales; f__Flavobacteriaceae; g__Aequorivita; s__Aequorivita vladivostokensis	yes	171194	no
GCA_001310225.1	Algibacter alginicilyticus	d__Bacteria; p__Bacteroidetes; c__Flavobacteriia; o__Flavobacteriales; f__Flavobacteriaceae; g__Algibacter; s__Algibacter alginicilyticus	d__Bacteria; p__Bacteroidota; c__Bacteroidia; o__Flavobacteriales; f__Flavobacteriaceae; g__Algibacter_A; s__Algibacter_A alginicilyticus	yes	1736674	yes	yes	0.00074	yes
GCA_900112595.1	Algibacter pectinivorans	d__Bacteria; p__Bacteroidetes; c__Flavobacteriia; o__Flavobacteriales; f__Flavobacteriaceae; g__Algibacter; s__Algibacter pectinivorans	d__Bacteria; p__Bacteroidota; c__Bacteroidia; o__Flavobacteriales; f__Flavobacteriaceae; g__Algibacter_B; s__Algibacter_B pectinivorans	yes	870482	yes	yes	0.00031	yes
GCA_001747085.1	Algibacter aquaticus	d__Bacteria; p__Bacteroidetes; c__Flavobacteriia; o__Flavobacteriales; f__Flavobacteriaceae; g__Algibacter; s__Algibacter aquaticus	d__Bacteria; p__Bacteroidota; c__Bacteroidia; o__Flavobacteriales; f__Flavobacteriaceae; g__Algibacter_C; s__Algibacter_C aquaticus	yes	1849968	yes	yes	0.00035	yes
GCA_006148925.1	Algibacter aestuarii	d__Bacteria; p__Bacteroidetes; c__Flavobacteriia; o__Flavobacteriales; f__Flavobacteriaceae; g__Algibacter; s__Algibacter aestuarii	d__Bacteria; p__Bacteroidota; c__Bacteroidia; o__Flavobacteriales; f__Flavobacteriaceae; g__Algibacter_D; s__Algibacter_D aestuarii	no
GCA_900112395.1	Algibacter lectus	d__Bacteria; p__Bacteroidetes; c__Flavobacteriia; o__Flavobacteriales; f__Flavobacteriaceae; g__Algibacter; s__Algibacter lectus	d__Bacteria; p__Bacteroidota; c__Bacteroidia; o__Flavobacteriales; f__Flavobacteriaceae; g__Algibacter; s__Algibacter lectus	yes	221126	yes	yes	0.00035	yes
GCA_000224335.2	Bizionia argentinensis JUB59	d__Bacteria; p__Bacteroidetes; c__Flavobacteriia; o__Flavobacteriales; f__Flavobacteriaceae; g__Bizionia; s__Bizionia argentinensis	d__Bacteria; p__Bacteroidota; c__Bacteroidia; o__Flavobacteriales; f__Flavobacteriaceae; g__Algorimicrobium; s__Algorimicrobium argentinensis	yes	1046627	yes	yes	0.00024	yes
GCA_900115185.1	Bizionia echini	d__Bacteria; p__Bacteroidetes; c__Flavobacteriia; o__Flavobacteriales; f__Flavobacteriaceae; g__Bizionia; s__Bizionia echini	d__Bacteria; p__Bacteroidota; c__Bacteroidia; o__Flavobacteriales; f__Flavobacteriaceae; g__Algorimicrobium; s__Algorimicrobium echini	yes	649333	yes	yes	8.5e-05	yes
GCA_006159205.1	Antarcticibacterium flavum	d__Bacteria; p__Bacteroidetes; c__Flavobacteriia; o__Flavobacteriales; f__Flavobacteriaceae; g__Antarcticibacterium; s__Antarcticibacterium flavum	d__Bacteria; p__Bacteroidota; c__Bacteroidia; o__Flavobacteriales; f__Flavobacteriaceae; g__Antarcticibacterium; s__Antarcticibacterium flavum	yes	2058175	yes	yes	0.00081	yes
GCA_000255455.1	Aquimarina agarilytica ZC1	d__Bacteria; p__Bacteroidetes; c__Flavobacteriia; o__Flavobacteriales; f__Flavobacteriaceae; g__Aquimarina; s__Aquimarina agarilytica	d__Bacteria; p__Bacteroidota; c__Bacteroidia; o__Flavobacteriales; f__Flavobacteriaceae; g__Aquimarina; s__Aquimarina agarilytica	no
GCA_000218485.1	Aquimarina agarivorans	d__Bacteria; p__Bacteroidetes; c__Flavobacteriia; o__Flavobacteriales; f__Flavobacteriaceae; g__Aquimarina; s__Aquimarina agarivorans	d__Bacteria; p__Bacteroidota; c__Bacteroidia; o__Flavobacteriales; f__Flavobacteriaceae; g__Aquimarina; s__Aquimarina agarivorans	no
GCA_001632745.1	Aquimarina aggregata	d__Bacteria; p__Bacteroidetes; c__Flavobacteriia; o__Flavobacteriales; f__Flavobacteriaceae; g__Aquimarina; s__Aquimarina aggregata	d__Bacteria; p__Bacteroidota; c__Bacteroidia; o__Flavobacteriales; f__Flavobacteriaceae; g__Aquimarina; s__Aquimarina aggregata	yes	1642818	yes	yes	0.0012	yes
GCA_900109375.1	Aquimarina amphilecti	d__Bacteria; p__Bacteroidetes; c__Flavobacteriia; o__Flavobacteriales; f__Flavobacteriaceae; g__Aquimarina; s__Aquimarina amphilecti	d__Bacteria; p__Bacteroidota; c__Bacteroidia; o__Flavobacteriales; f__Flavobacteriaceae; g__Aquimarina; s__Aquimarina amphilecti	yes	1038014	no
GCA_000626715.1	Aquimarina atlantica	d__Bacteria; p__Bacteroidetes; c__Flavobacteriia; o__Flavobacteriales; f__Flavobacteriaceae; g__Aquimarina; s__Aquimarina atlantica	d__Bacteria; p__Bacteroidota; c__Bacteroidia; o__Flavobacteriales; f__Flavobacteriaceae; g__Aquimarina; s__Aquimarina atlantica	yes	1317122	yes	yes	0.00098	yes
GCA_004216895.1	Aquimarina brevivitae	d__Bacteria; p__Bacteroidetes; c__Flavobacteriia; o__Flavobacteriales; f__Flavobacteriaceae; g__Aquimarina; s__Aquimarina brevivitae	d__Bacteria; p__Bacteroidota; c__Bacteroidia; o__Flavobacteriales; f__Flavobacteriaceae; g__Aquimarina; s__Aquimarina brevivitae	yes	323412	yes	yes	8.6e-05	yes
GCA_000430645.1	Aquimarina latercula DSM 2041	d__Bacteria; p__Bacteroidetes; c__Flavobacteriia; o__Flavobacteriales; f__Flavobacteriaceae; g__Aquimarina; s__Aquimarina latercula	d__Bacteria; p__Bacteroidota; c__Bacteroidia; o__Flavobacteriales; f__Flavobacteriaceae; g__Aquimarina; s__Aquimarina latercula	no
GCA_001401755.1	Aquimarina longa SW024	d__Bacteria; p__Bacteroidetes; c__Flavobacteriia; o__Flavobacteriales; f__Flavobacteriaceae; g__Aquimarina; s__Aquimarina longa	d__Bacteria; p__Bacteroidota; c__Bacteroidia; o__Flavobacteriales; f__Flavobacteriaceae; g__Aquimarina; s__Aquimarina longa	no
GCA_000520995.1	Aquimarina macrocephali JAMB N27	d__Bacteria; p__Bacteroidetes; c__Flavobacteriia; o__Flavobacteriales; f__Flavobacteriaceae; g__Aquimarina; s__Aquimarina macrocephali	d__Bacteria; p__Bacteroidota; c__Bacteroidia; o__Flavobacteriales; f__Flavobacteriaceae; g__Aquimarina; s__Aquimarina macrocephali	no
GCA_000520975.1	Aquimarina megaterium XH134	d__Bacteria; p__Bacteroidetes; c__Flavobacteriia; o__Flavobacteriales; f__Flavobacteriaceae; g__Aquimarina; s__Aquimarina megaterium	d__Bacteria; p__Bacteroidota; c__Bacteroidia; o__Flavobacteriales; f__Flavobacteriaceae; g__Aquimarina; s__Aquimarina megaterium	no
GCA_000430665.1	Aquimarina muelleri DSM 19832	d__Bacteria; p__Bacteroidetes; c__Flavobacteriia; o__Flavobacteriales; f__Flavobacteriaceae; g__Aquimarina; s__Aquimarina muelleri	d__Bacteria; p__Bacteroidota; c__Bacteroidia; o__Flavobacteriales; f__Flavobacteriaceae; g__Aquimarina; s__Aquimarina muelleri	no
GCA_000520955.1	Aquimarina pacifica	d__Bacteria; p__Bacteroidetes; c__Flavobacteriia; o__Flavobacteriales; f__Flavobacteriaceae; g__Aquimarina; s__Aquimarina pacifica	d__Bacteria; p__Bacteroidota; c__Bacteroidia; o__Flavobacteriales; f__Flavobacteriaceae; g__Aquimarina; s__Aquimarina pacifica	no
GCA_002895435.1	Aquimarina sediminis	d__Bacteria; p__Bacteroidetes; c__Flavobacteriia; o__Flavobacteriales; f__Flavobacteriaceae; g__Aquimarina; s__Aquimarina sediminis	d__Bacteria; p__Bacteroidota; c__Bacteroidia; o__Flavobacteriales; f__Flavobacteriaceae; g__Aquimarina; s__Aquimarina sediminis	no
GCA_900141785.1	Aquimarina spongiae	d__Bacteria; p__Bacteroidetes; c__Flavobacteriia; o__Flavobacteriales; f__Flavobacteriaceae; g__Aquimarina; s__Aquimarina spongiae	d__Bacteria; p__Bacteroidota; c__Bacteroidia; o__Flavobacteriales; f__Flavobacteriaceae; g__Aquimarina; s__Aquimarina spongiae	yes	570521	yes	yes	0.00019	yes
GCA_000733925.1	Arenibacter algicola	d__Bacteria; p__Bacteroidetes; c__Flavobacteriia; o__Flavobacteriales; f__Flavobacteriaceae; g__Arenibacter; s__Arenibacter algicola	d__Bacteria; p__Bacteroidota; c__Bacteroidia; o__Flavobacteriales; f__Flavobacteriaceae; g__Arenibacter; s__Arenibacter algicola	no
GCA_002909235.1	Arenibacter catalasegens	d__Bacteria; p__Bacteroidetes; c__Flavobacteriia; o__Flavobacteriales; f__Flavobacteriaceae; g__Arenibacter; s__Arenibacter catalasegens	d__Bacteria; p__Bacteroidota; c__Bacteroidia; o__Flavobacteriales; f__Flavobacteriaceae; g__Arenibacter; s__Arenibacter catalasegens	no
GCA_000429545.1	Arenibacter certesii DSM 19833	d__Bacteria; p__Bacteroidetes; c__Flavobacteriia; o__Flavobacteriales; f__Flavobacteriaceae; g__Arenibacter; s__Arenibacter certesii	d__Bacteria; p__Bacteroidota; c__Bacteroidia; o__Flavobacteriales; f__Flavobacteriaceae; g__Arenibacter; s__Arenibacter certesii	no
GCA_003259375.1	Arenibacter echinorum	d__Bacteria; p__Bacteroidetes; c__Flavobacteriia; o__Flavobacteriales; f__Flavobacteriaceae; g__Arenibacter; s__Arenibacter echinorum	d__Bacteria; p__Bacteroidota; c__Bacteroidia; o__Flavobacteriales; f__Flavobacteriaceae; g__Arenibacter; s__Arenibacter echinorum	yes	440515	no
GCA_002909255.1	Arenibacter hampyeongensis	d__Bacteria; p__Bacteroidetes; c__Flavobacteriia; o__Flavobacteriales; f__Flavobacteriaceae; g__Arenibacter; s__Arenibacter hampyeongensis	d__Bacteria; p__Bacteroidota; c__Bacteroidia; o__Flavobacteriales; f__Flavobacteriaceae; g__Arenibacter; s__Arenibacter hampyeongensis	no
GCA_000424985.1	Arenibacter latericius DSM 15913	d__Bacteria; p__Bacteroidetes; c__Flavobacteriia; o__Flavobacteriales; f__Flavobacteriaceae; g__Arenibacter; s__Arenibacter latericius	d__Bacteria; p__Bacteroidota; c__Bacteroidia; o__Flavobacteriales; f__Flavobacteriaceae; g__Arenibacter; s__Arenibacter latericius	no
GCA_900129275.1	Arenibacter palladensis	d__Bacteria; p__Bacteroidetes; c__Flavobacteriia; o__Flavobacteriales; f__Flavobacteriaceae; g__Arenibacter; s__Arenibacter palladensis	d__Bacteria; p__Bacteroidota; c__Bacteroidia; o__Flavobacteriales; f__Flavobacteriaceae; g__Arenibacter; s__Arenibacter palladensis	yes	237373	yes	yes	0.014	yes
GCA_900177645.1	Arenibacter troitsensis	d__Bacteria; p__Bacteroidetes; c__Flavobacteriia; o__Flavobacteriales; f__Flavobacteriaceae; g__Arenibacter; s__Arenibacter troitsensis	d__Bacteria; p__Bacteroidota; c__Bacteroidia; o__Flavobacteriales; f__Flavobacteriaceae; g__Arenibacter; s__Arenibacter troitsensis	yes	188872	yes	yes	0.014	yes
GCA_900141715.1	Arenitalea lutea	d__Bacteria; p__Bacteroidetes; c__Flavobacteriia; o__Flavobacteriales; f__Flavobacteriaceae; g__Arenitalea; s__Arenitalea lutea	d__Bacteria; p__Bacteroidota; c__Bacteroidia; o__Flavobacteriales; f__Flavobacteriaceae; g__Arenitalea; s__Arenitalea lutea	yes	1178825	yes	yes	0.00035	yes
GCA_003008425.1	Mesoflavibacter aestuarii	d__Bacteria; p__Bacteroidetes; c__Flavobacteriia; o__Flavobacteriales; f__Flavobacteriaceae; g__Mesoflavibacter; s__Mesoflavibacter aestuarii	d__Bacteria; p__Bacteroidota; c__Bacteroidia; o__Flavobacteriales; f__Flavobacteriaceae; g__Aurantibacter; s__Aurantibacter aestuarii	yes	1266046	yes	yes	0.0066	yes
GCA_002954325.1	Aureicoccus marinus	d__Bacteria; p__Bacteroidetes; c__Flavobacteriia; o__Flavobacteriales; f__Flavobacteriaceae; g__Aureicoccus; s__Aureicoccus marinus	d__Bacteria; p__Bacteroidota; c__Bacteroidia; o__Flavobacteriales; f__Flavobacteriaceae; g__Aureicoccus; s__Aureicoccus marinus	yes	754435	yes	yes	0.00053	yes
GCA_002943755.1	Aureitalea marina	d__Bacteria; p__Bacteroidetes; c__Flavobacteriia; o__Flavobacteriales; f__Flavobacteriaceae; g__Aureitalea; s__Aureitalea marina	d__Bacteria; p__Bacteroidota; c__Bacteroidia; o__Flavobacteriales; f__Flavobacteriaceae; g__Aureitalea; s__Aureitalea marina	yes	930804	yes	yes	0.0019	yes
GCA_900107625.1	Bizionia paragorgiae	d__Bacteria; p__Bacteroidetes; c__Flavobacteriia; o__Flavobacteriales; f__Flavobacteriaceae; g__Bizionia; s__Bizionia paragorgiae	d__Bacteria; p__Bacteroidota; c__Bacteroidia; o__Flavobacteriales; f__Flavobacteriaceae; g__Bizionia; s__Bizionia paragorgiae	yes	283786	yes	yes	5.1e-05	yes
GCA_002302565.1	Capnocytophaga canimorsus	d__Bacteria; p__Bacteroidetes; c__Flavobacteriia; o__Flavobacteriales; f__Flavobacteriaceae; g__Capnocytophaga; s__Capnocytophaga canimorsus	d__Bacteria; p__Bacteroidota; c__Bacteroidia; o__Flavobacteriales; f__Flavobacteriaceae; g__Capnocytophaga; s__Capnocytophaga canimorsus	yes	28188	yes	yes	0.0018	yes
GCA_000827555.1	Capnocytophaga canis	d__Bacteria; p__Bacteroidetes; c__Flavobacteriia; o__Flavobacteriales; f__Flavobacteriaceae; g__Capnocytophaga; s__Capnocytophaga canis	d__Bacteria; p__Bacteroidota; c__Bacteroidia; o__Flavobacteriales; f__Flavobacteriaceae; g__Capnocytophaga; s__Capnocytophaga canis	yes	1848903	yes	yes	0.0015	yes
GCA_000379185.1	Capnocytophaga cynodegmi DSM 19736	d__Bacteria; p__Bacteroidetes; c__Flavobacteriia; o__Flavobacteriales; f__Flavobacteriaceae; g__Capnocytophaga; s__Capnocytophaga cynodegmi	d__Bacteria; p__Bacteroidota; c__Bacteroidia; o__Flavobacteriales; f__Flavobacteriaceae; g__Capnocytophaga; s__Capnocytophaga cynodegmi	no
GCA_000174755.1	Capnocytophaga gingivalis ATCC 33624	d__Bacteria; p__Bacteroidetes; c__Flavobacteriia; o__Flavobacteriales; f__Flavobacteriaceae; g__Capnocytophaga; s__Capnocytophaga gingivalis	d__Bacteria; p__Bacteroidota; c__Bacteroidia; o__Flavobacteriales; f__Flavobacteriaceae; g__Capnocytophaga; s__Capnocytophaga gingivalis	yes	553178	yes	no		no
GCA_000411115.1	Capnocytophaga granulosa ATCC 51502	d__Bacteria; p__Bacteroidetes; c__Flavobacteriia; o__Flavobacteriales; f__Flavobacteriaceae; g__Capnocytophaga; s__Capnocytophaga granulosa	d__Bacteria; p__Bacteroidota; c__Bacteroidia; o__Flavobacteriales; f__Flavobacteriaceae; g__Capnocytophaga; s__Capnocytophaga granulosa	yes	641143	yes	no		no
GCA_001553545.1	Capnocytophaga haemolytica	d__Bacteria; p__Bacteroidetes; c__Flavobacteriia; o__Flavobacteriales; f__Flavobacteriaceae; g__Capnocytophaga; s__Capnocytophaga haemolytica	d__Bacteria; p__Bacteroidota; c__Bacteroidia; o__Flavobacteriales; f__Flavobacteriaceae; g__Capnocytophaga; s__Capnocytophaga haemolytica	yes	45243	yes	yes	0.00058	yes
GCA_003054025.1	Capnocytophaga leadbetteri	d__Bacteria; p__Bacteroidetes; c__Flavobacteriia; o__Flavobacteriales; f__Flavobacteriaceae; g__Capnocytophaga; s__Capnocytophaga leadbetteri	d__Bacteria; p__Bacteroidota; c__Bacteroidia; o__Flavobacteriales; f__Flavobacteriaceae; g__Capnocytophaga; s__Capnocytophaga leadbetteri	yes	327575	yes	yes	0.0025	yes
GCA_000023285.1	Capnocytophaga ochracea DSM 7271	d__Bacteria; p__Bacteroidetes; c__Flavobacteriia; o__Flavobacteriales; f__Flavobacteriaceae; g__Capnocytophaga; s__Capnocytophaga ochracea	d__Bacteria; p__Bacteroidota; c__Bacteroidia; o__Flavobacteriales; f__Flavobacteriaceae; g__Capnocytophaga; s__Capnocytophaga ochracea	yes	521097	no
GCA_900446695.1	Capnocytophaga sputigena	d__Bacteria; p__Bacteroidetes; c__Flavobacteriia; o__Flavobacteriales; f__Flavobacteriaceae; g__Capnocytophaga; s__Capnocytophaga sputigena	d__Bacteria; p__Bacteroidota; c__Bacteroidia; o__Flavobacteriales; f__Flavobacteriaceae; g__Capnocytophaga; s__Capnocytophaga sputigena	yes	1019	no
GCA_000186265.1	Cellulophaga algicola DSM 14237	d__Bacteria; p__Bacteroidetes; c__Flavobacteriia; o__Flavobacteriales; f__Flavobacteriaceae; g__Cellulophaga; s__Cellulophaga algicola	d__Bacteria; p__Bacteroidota; c__Bacteroidia; o__Flavobacteriales; f__Flavobacteriaceae; g__Cellulophaga; s__Cellulophaga algicola	yes	688270	yes	yes	0.019	yes
GCA_900102165.1	Cellulophaga baltica	d__Bacteria; p__Bacteroidetes; c__Flavobacteriia; o__Flavobacteriales; f__Flavobacteriaceae; g__Cellulophaga; s__Cellulophaga baltica	d__Bacteria; p__Bacteroidota; c__Bacteroidia; o__Flavobacteriales; f__Flavobacteriaceae; g__Cellulophaga; s__Cellulophaga baltica	yes	76594	yes	yes	0.01	yes
GCA_900119145.1	Cellulophaga fucicola	d__Bacteria; p__Bacteroidetes; c__Flavobacteriia; o__Flavobacteriales; f__Flavobacteriaceae; g__Cellulophaga; s__Cellulophaga fucicola	d__Bacteria; p__Bacteroidota; c__Bacteroidia; o__Flavobacteriales; f__Flavobacteriaceae; g__Cellulophaga; s__Cellulophaga fucicola	yes	76595	yes	yes	0.0036	yes
GCA_000190595.1	Cellulophaga lytica DSM 7489	d__Bacteria; p__Bacteroidetes; c__Flavobacteriia; o__Flavobacteriales; f__Flavobacteriaceae; g__Cellulophaga; s__Cellulophaga lytica	d__Bacteria; p__Bacteroidota; c__Bacteroidia; o__Flavobacteriales; f__Flavobacteriaceae; g__Cellulophaga; s__Cellulophaga lytica	yes	867900	yes	yes	0.0036	yes
GCA_900176415.1	Cellulophaga tyrosinoxydans	d__Bacteria; p__Bacteroidetes; c__Flavobacteriia; o__Flavobacteriales; f__Flavobacteriaceae; g__Cellulophaga; s__Cellulophaga tyrosinoxydans	d__Bacteria; p__Bacteroidota; c__Bacteroidia; o__Flavobacteriales; f__Flavobacteriaceae; g__Cellulophaga; s__Cellulophaga tyrosinoxydans	yes	504486	yes	yes	0.008	yes
GCA_002807055.1	Confluentibacter citreus	d__Bacteria; p__Bacteroidetes; c__Flavobacteriia; o__Flavobacteriales; f__Flavobacteriaceae; g__Confluentibacter; s__Confluentibacter citreus	d__Bacteria; p__Bacteroidota; c__Bacteroidia; o__Flavobacteriales; f__Flavobacteriaceae; g__Confluentibacter; s__Confluentibacter citreus	no
GCA_002806995.1	Confluentibacter lentus	d__Bacteria; p__Bacteroidetes; c__Flavobacteriia; o__Flavobacteriales; f__Flavobacteriaceae; g__Confluentibacter; s__Confluentibacter lentus	d__Bacteria; p__Bacteroidota; c__Bacteroidia; o__Flavobacteriales; f__Flavobacteriaceae; g__Confluentibacter; s__Confluentibacter lentus	no
GCA_000196315.1	Croceibacter atlanticus HTCC2559	d__Bacteria; p__Bacteroidetes; c__Flavobacteriia; o__Flavobacteriales; f__Flavobacteriaceae; g__Croceibacter; s__Croceibacter atlanticus	d__Bacteria; p__Bacteroidota; c__Bacteroidia; o__Flavobacteriales; f__Flavobacteriaceae; g__Croceibacter; s__Croceibacter atlanticus	yes	216432	yes	yes	4.1e-06	yes
GCA_001306415.1	Croceitalea dokdonensis DOKDO 023	d__Bacteria; p__Bacteroidetes; c__Flavobacteriia; o__Flavobacteriales; f__Flavobacteriaceae; g__Croceitalea; s__Croceitalea dokdonensis	d__Bacteria; p__Bacteroidota; c__Bacteroidia; o__Flavobacteriales; f__Flavobacteriaceae; g__Croceitalea; s__Croceitalea dokdonensis	yes	1300341	yes	yes	0.02	yes
GCA_002072105.2	Croceivirga radicis	d__Bacteria; p__Bacteroidetes; c__Flavobacteriia; o__Flavobacteriales; f__Flavobacteriaceae; g__Croceivirga; s__Croceivirga radicis	d__Bacteria; p__Bacteroidota; c__Bacteroidia; o__Flavobacteriales; f__Flavobacteriaceae; g__Croceivirga; s__Croceivirga radicis	yes	1929488	yes	yes	0.0066	yes
GCA_001653755.1	Dokdonia donghaensis DSW-1	d__Bacteria; p__Bacteroidetes; c__Flavobacteriia; o__Flavobacteriales; f__Flavobacteriaceae; g__Dokdonia; s__Dokdonia donghaensis	d__Bacteria; p__Bacteroidota; c__Bacteroidia; o__Flavobacteriales; f__Flavobacteriaceae; g__Dokdonia; s__Dokdonia donghaensis	yes	1300343	yes	yes	0.00021	yes
GCA_900188275.1	Dokdonia pacifica	d__Bacteria; p__Bacteroidetes; c__Flavobacteriia; o__Flavobacteriales; f__Flavobacteriaceae; g__Dokdonia; s__Dokdonia pacifica	d__Bacteria; p__Bacteroidota; c__Bacteroidia; o__Flavobacteriales; f__Flavobacteriaceae; g__Dokdonia; s__Dokdonia pacifica	yes	1627892	yes	yes	2.7e-05	yes
GCA_000382125.1	Eudoraea adriatica DSM 19308	d__Bacteria; p__Bacteroidetes; c__Flavobacteriia; o__Flavobacteriales; f__Flavobacteriaceae; g__Eudoraea; s__Eudoraea adriatica	d__Bacteria; p__Bacteroidota; c__Bacteroidia; o__Flavobacteriales; f__Flavobacteriaceae; g__Eudoraea; s__Eudoraea adriatica	no
GCA_000789235.1	Flaviramulus ichthyoenteri Th78	d__Bacteria; p__Bacteroidetes; c__Flavobacteriia; o__Flavobacteriales; f__Flavobacteriaceae; g__Flaviramulus; s__Flaviramulus ichthyoenteri	d__Bacteria; p__Bacteroidota; c__Bacteroidia; o__Flavobacteriales; f__Flavobacteriaceae; g__Flaviramulus_A; s__Flaviramulus_A ichthyoenteri	no
GCA_900114265.1	Flaviramulus basaltis	d__Bacteria; p__Bacteroidetes; c__Flavobacteriia; o__Flavobacteriales; f__Flavobacteriaceae; g__Flaviramulus; s__Flaviramulus basaltis	d__Bacteria; p__Bacteroidota; c__Bacteroidia; o__Flavobacteriales; f__Flavobacteriaceae; g__Flaviramulus; s__Flaviramulus basaltis	yes	369401	yes	yes	0.00035	yes
GCA_002886045.1	Flavivirga eckloniae	d__Bacteria; p__Bacteroidetes; c__Flavobacteriia; o__Flavobacteriales; f__Flavobacteriaceae; g__Flavivirga; s__Flavivirga eckloniae	d__Bacteria; p__Bacteroidota; c__Bacteroidia; o__Flavobacteriales; f__Flavobacteriaceae; g__Flavivirga; s__Flavivirga eckloniae	yes	1803846	yes	yes	0.00021	yes
GCA_003268855.1	Flavobacterium aciduliphilum	d__Bacteria; p__Bacteroidetes; c__Flavobacteriia; o__Flavobacteriales; f__Flavobacteriaceae; g__Flavobacterium; s__Flavobacterium aciduliphilum	d__Bacteria; p__Bacteroidota; c__Bacteroidia; o__Flavobacteriales; f__Flavobacteriaceae; g__Flavobacterium; s__Flavobacterium aciduliphilum	yes	1101402	yes	yes	0.0015	yes
GCA_001278115.1	Flavobacterium akiainvivens	d__Bacteria; p__Bacteroidetes; c__Flavobacteriia; o__Flavobacteriales; f__Flavobacteriaceae; g__Flavobacterium; s__Flavobacterium akiainvivens	d__Bacteria; p__Bacteroidota; c__Bacteroidia; o__Flavobacteriales; f__Flavobacteriaceae; g__Flavobacterium; s__Flavobacterium akiainvivens	yes	1202724	yes	yes	0.0023	yes
GCA_003096035.1	Flavobacterium album	d__Bacteria; p__Bacteroidetes; c__Flavobacteriia; o__Flavobacteriales; f__Flavobacteriaceae; g__Flavobacterium; s__Flavobacterium album	d__Bacteria; p__Bacteroidota; c__Bacteroidia; o__Flavobacteriales; f__Flavobacteriaceae; g__Flavobacterium; s__Flavobacterium album	yes	2175091	no
GCA_002920895.1	Flavobacterium alvei	d__Bacteria; p__Bacteroidetes; c__Flavobacteriia; o__Flavobacteriales; f__Flavobacteriaceae; g__Flavobacterium; s__Flavobacterium alvei	d__Bacteria; p__Bacteroidota; c__Bacteroidia; o__Flavobacteriales; f__Flavobacteriaceae; g__Flavobacterium; s__Flavobacterium alvei	yes	2080416	yes	yes	0.0018	yes
GCA_900101855.1	Flavobacterium anhuiense	d__Bacteria; p__Bacteroidetes; c__Flavobacteriia; o__Flavobacteriales; f__Flavobacteriaceae; g__Flavobacterium; s__Flavobacterium anhuiense	d__Bacteria; p__Bacteroidota; c__Bacteroidia; o__Flavobacteriales; f__Flavobacteriaceae; g__Flavobacterium; s__Flavobacterium anhuiense	yes	459526	yes	yes	0.0044	yes
GCA_000419685.1	Flavobacterium antarcticum DSM 19726	d__Bacteria; p__Bacteroidetes; c__Flavobacteriia; o__Flavobacteriales; f__Flavobacteriaceae; g__Flavobacterium; s__Flavobacterium antarcticum	d__Bacteria; p__Bacteroidota; c__Bacteroidia; o__Flavobacteriales; f__Flavobacteriaceae; g__Flavobacterium; s__Flavobacterium antarcticum	no
GCA_003259835.1	Flavobacterium aquaticum	d__Bacteria; p__Bacteroidetes; c__Flavobacteriia; o__Flavobacteriales; f__Flavobacteriaceae; g__Flavobacterium; s__Flavobacterium aquaticum	d__Bacteria; p__Bacteroidota; c__Bacteroidia; o__Flavobacteriales; f__Flavobacteriaceae; g__Flavobacterium; s__Flavobacterium aquaticum	yes	1236486	yes	yes	0.0034	yes
GCA_000757385.1	Flavobacterium aquatile LMG 4008 = ATCC 11947	d__Bacteria; p__Bacteroidetes; c__Flavobacteriia; o__Flavobacteriales; f__Flavobacteriaceae; g__Flavobacterium; s__Flavobacterium aquatile	d__Bacteria; p__Bacteroidota; c__Bacteroidia; o__Flavobacteriales; f__Flavobacteriaceae; g__Flavobacterium; s__Flavobacterium aquatile	yes	1453498	yes	yes	0.00069	yes
GCA_003385115.1	Flavobacterium aquicola	d__Bacteria; p__Bacteroidetes; c__Flavobacteriia; o__Flavobacteriales; f__Flavobacteriaceae; g__Flavobacterium; s__Flavobacterium aquicola	d__Bacteria; p__Bacteroidota; c__Bacteroidia; o__Flavobacteriales; f__Flavobacteriaceae; g__Flavobacterium; s__Flavobacterium aquicola	yes	1682742	yes	yes	0.0017	yes
GCA_900107365.1	Flavobacterium aquidurense	d__Bacteria; p__Bacteroidetes; c__Flavobacteriia; o__Flavobacteriales; f__Flavobacteriaceae; g__Flavobacterium; s__Flavobacterium aquidurense	d__Bacteria; p__Bacteroidota; c__Bacteroidia; o__Flavobacteriales; f__Flavobacteriaceae; g__Flavobacterium; s__Flavobacterium aquidurense	yes	362413	yes	yes	0.0018	yes
GCA_002222055.1	Flavobacterium araucananum	d__Bacteria; p__Bacteroidetes; c__Flavobacteriia; o__Flavobacteriales; f__Flavobacteriaceae; g__Flavobacterium; s__Flavobacterium araucananum	d__Bacteria; p__Bacteroidota; c__Bacteroidia; o__Flavobacteriales; f__Flavobacteriaceae; g__Flavobacterium; s__Flavobacterium araucananum	yes	946678	yes	yes	0.0018	yes
GCA_003344925.1	Flavobacterium arcticum	d__Bacteria; p__Bacteroidetes; c__Flavobacteriia; o__Flavobacteriales; f__Flavobacteriaceae; g__Flavobacterium; s__Flavobacterium arcticum	d__Bacteria; p__Bacteroidota; c__Bacteroidia; o__Flavobacteriales; f__Flavobacteriaceae; g__Flavobacterium; s__Flavobacterium arcticum	yes	1784713	yes	yes	0.0025	yes
GCA_002251775.1	Flavobacterium aurantiibacter	d__Bacteria; p__Bacteroidetes; c__Flavobacteriia; o__Flavobacteriales; f__Flavobacteriaceae; g__Flavobacterium; s__Flavobacterium aurantiibacter	d__Bacteria; p__Bacteroidota; c__Bacteroidia; o__Flavobacteriales; f__Flavobacteriaceae; g__Flavobacterium; s__Flavobacterium aurantiibacter	yes	2023067	yes	yes	0.0011	yes
GCA_000769915.1	Flavobacterium beibuense F44-8	d__Bacteria; p__Bacteroidetes; c__Flavobacteriia; o__Flavobacteriales; f__Flavobacteriaceae; g__Flavobacterium; s__Flavobacterium beibuense	d__Bacteria; p__Bacteroidota; c__Bacteroidia; o__Flavobacteriales; f__Flavobacteriaceae; g__Flavobacterium; s__Flavobacterium beibuense	yes	1406840	yes	yes	0.0014	yes
GCA_002217205.1	Flavobacterium branchiophilum NBRC 15030 = ATCC 35035	d__Bacteria; p__Bacteroidetes; c__Flavobacteriia; o__Flavobacteriales; f__Flavobacteriaceae; g__Flavobacterium; s__Flavobacterium branchiophilum	d__Bacteria; p__Bacteroidota; c__Bacteroidia; o__Flavobacteriales; f__Flavobacteriaceae; g__Flavobacterium; s__Flavobacterium branchiophilum	yes	1218110	yes	yes	0.0014	yes
GCA_900101895.1	Flavobacterium caeni	d__Bacteria; p__Bacteroidetes; c__Flavobacteriia; o__Flavobacteriales; f__Flavobacteriaceae; g__Flavobacterium; s__Flavobacterium caeni	d__Bacteria; p__Bacteroidota; c__Bacteroidia; o__Flavobacteriales; f__Flavobacteriaceae; g__Flavobacterium; s__Flavobacterium caeni	yes	490189	yes	no		no
GCA_000498475.1	Flavobacterium cauense R2A-7	d__Bacteria; p__Bacteroidetes; c__Flavobacteriia; o__Flavobacteriales; f__Flavobacteriaceae; g__Flavobacterium; s__Flavobacterium cauense	d__Bacteria; p__Bacteroidota; c__Bacteroidia; o__Flavobacteriales; f__Flavobacteriaceae; g__Flavobacterium; s__Flavobacterium cauense	yes	1341154	yes	yes	8.1e-05	yes
GCA_004363695.1	Flavobacterium cheniae	d__Bacteria; p__Bacteroidetes; c__Flavobacteriia; o__Flavobacteriales; f__Flavobacteriaceae; g__Flavobacterium; s__Flavobacterium cheniae	d__Bacteria; p__Bacteroidota; c__Bacteroidia; o__Flavobacteriales; f__Flavobacteriaceae; g__Flavobacterium; s__Flavobacterium cheniae	yes	295428	yes	yes	0.0034	yes
GCA_001602525.1	Flavobacterium chilense	d__Bacteria; p__Bacteroidetes; c__Flavobacteriia; o__Flavobacteriales; f__Flavobacteriaceae; g__Flavobacterium; s__Flavobacterium chilense	d__Bacteria; p__Bacteroidota; c__Bacteroidia; o__Flavobacteriales; f__Flavobacteriaceae; g__Flavobacterium; s__Flavobacterium chilense	no
GCA_004345565.1	Flavobacterium circumlabens	d__Bacteria; p__Bacteroidetes; c__Flavobacteriia; o__Flavobacteriales; f__Flavobacteriaceae; g__Flavobacterium; s__Flavobacterium circumlabens	d__Bacteria; p__Bacteroidota; c__Bacteroidia; o__Flavobacteriales; f__Flavobacteriaceae; g__Flavobacterium; s__Flavobacterium circumlabens	yes	2133765	yes	yes	0.0018	yes
GCA_002217245.1	Flavobacterium columnare NBRC 100251 = ATCC 23463	d__Bacteria; p__Bacteroidetes; c__Flavobacteriia; o__Flavobacteriales; f__Flavobacteriaceae; g__Flavobacterium; s__Flavobacterium columnare	d__Bacteria; p__Bacteroidota; c__Bacteroidia; o__Flavobacteriales; f__Flavobacteriaceae; g__Flavobacterium; s__Flavobacterium columnare_A	yes	1218111	yes	yes	0.0064	yes
GCA_002530675.1	Flavobacterium columnare NBRC 100251 = ATCC 23463	d__Bacteria; p__Bacteroidetes; c__Flavobacteriia; o__Flavobacteriales; f__Flavobacteriaceae; g__Flavobacterium; s__Flavobacterium columnare	d__Bacteria; p__Bacteroidota; c__Bacteroidia; o__Flavobacteriales; f__Flavobacteriaceae; g__Flavobacterium; s__Flavobacterium columnare	yes	1218111	yes	yes	0.0064	yes
GCA_001857965.1	Flavobacterium commune	d__Bacteria; p__Bacteroidetes; c__Flavobacteriia; o__Flavobacteriales; f__Flavobacteriaceae; g__Flavobacterium; s__Flavobacterium commune	d__Bacteria; p__Bacteroidota; c__Bacteroidia; o__Flavobacteriales; f__Flavobacteriaceae; g__Flavobacterium; s__Flavobacterium commune	yes	1306519	yes	yes	0.001	yes
GCA_001831475.1	Flavobacterium crassostreae	d__Bacteria; p__Bacteroidetes; c__Flavobacteriia; o__Flavobacteriales; f__Flavobacteriaceae; g__Flavobacterium; s__Flavobacterium crassostreae	d__Bacteria; p__Bacteroidota; c__Bacteroidia; o__Flavobacteriales; f__Flavobacteriaceae; g__Flavobacterium; s__Flavobacterium crassostreae	no
GCA_002917885.1	Flavobacterium croceum DSM 17960	d__Bacteria; p__Bacteroidetes; c__Flavobacteriia; o__Flavobacteriales; f__Flavobacteriaceae; g__Flavobacterium; s__Flavobacterium croceum	d__Bacteria; p__Bacteroidota; c__Bacteroidia; o__Flavobacteriales; f__Flavobacteriaceae; g__Flavobacterium; s__Flavobacterium croceum	yes	1121886	yes	yes	0.0039	yes
GCA_003122385.1	Flavobacterium crocinum	d__Bacteria; p__Bacteroidetes; c__Flavobacteriia; o__Flavobacteriales; f__Flavobacteriaceae; g__Flavobacterium; s__Flavobacterium crocinum	d__Bacteria; p__Bacteroidota; c__Bacteroidia; o__Flavobacteriales; f__Flavobacteriaceae; g__Flavobacterium; s__Flavobacterium crocinum	yes	2183896	yes	yes	0.0044	yes
GCA_900148835.1	Flavobacterium cucumis	d__Bacteria; p__Bacteroidetes; c__Flavobacteriia; o__Flavobacteriales; f__Flavobacteriaceae; g__Flavobacterium; s__Flavobacterium cucumis	d__Bacteria; p__Bacteroidota; c__Bacteroidia; o__Flavobacteriales; f__Flavobacteriaceae; g__Flavobacterium; s__Flavobacterium cucumis	yes	416016	yes	yes	0.0034	yes
GCA_003996965.1	Flavobacterium cupreum	d__Bacteria; p__Bacteroidetes; c__Flavobacteriia; o__Flavobacteriales; f__Flavobacteriaceae; g__Flavobacterium; s__Flavobacterium cupreum	d__Bacteria; p__Bacteroidota; c__Bacteroidia; o__Flavobacteriales; f__Flavobacteriaceae; g__Flavobacterium; s__Flavobacterium cupreum	yes	2133766	yes	yes	0.0018	yes
GCA_003385895.1	Flavobacterium cutihirudinis	d__Bacteria; p__Bacteroidetes; c__Flavobacteriia; o__Flavobacteriales; f__Flavobacteriaceae; g__Flavobacterium; s__Flavobacterium cutihirudinis	d__Bacteria; p__Bacteroidota; c__Bacteroidia; o__Flavobacteriales; f__Flavobacteriaceae; g__Flavobacterium; s__Flavobacterium cutihirudinis	yes	1265740	yes	yes	0.0044	yes
GCA_002251835.1	Flavobacterium cyanobacteriorum	d__Bacteria; p__Bacteroidetes; c__Flavobacteriia; o__Flavobacteriales; f__Flavobacteriaceae; g__Flavobacterium; s__Flavobacterium cyanobacteriorum	d__Bacteria; p__Bacteroidota; c__Bacteroidia; o__Flavobacteriales; f__Flavobacteriaceae; g__Flavobacterium; s__Flavobacterium cyanobacteriorum	yes	2022802	yes	yes	0.0025	yes
GCA_000425425.1	Flavobacterium daejeonense DSM 17708	d__Bacteria; p__Bacteroidetes; c__Flavobacteriia; o__Flavobacteriales; f__Flavobacteriaceae; g__Flavobacterium; s__Flavobacterium daejeonense	d__Bacteria; p__Bacteroidota; c__Bacteroidia; o__Flavobacteriales; f__Flavobacteriaceae; g__Flavobacterium; s__Flavobacterium daejeonense	no
GCA_004362665.1	Flavobacterium dankookense	d__Bacteria; p__Bacteroidetes; c__Flavobacteriia; o__Flavobacteriales; f__Flavobacteriaceae; g__Flavobacterium; s__Flavobacterium dankookense	d__Bacteria; p__Bacteroidota; c__Bacteroidia; o__Flavobacteriales; f__Flavobacteriaceae; g__Flavobacterium; s__Flavobacterium dankookense	yes	706186	yes	yes	0.0015	yes
GCA_900129555.1	Flavobacterium defluvii	d__Bacteria; p__Bacteroidetes; c__Flavobacteriia; o__Flavobacteriales; f__Flavobacteriaceae; g__Flavobacterium; s__Flavobacterium defluvii	d__Bacteria; p__Bacteroidota; c__Bacteroidia; o__Flavobacteriales; f__Flavobacteriaceae; g__Flavobacterium; s__Flavobacterium defluvii	yes	370979	yes	yes	0.0044	yes
GCA_900106645.1	Flavobacterium degerlachei	d__Bacteria; p__Bacteroidetes; c__Flavobacteriia; o__Flavobacteriales; f__Flavobacteriaceae; g__Flavobacterium; s__Flavobacterium degerlachei	d__Bacteria; p__Bacteroidota; c__Bacteroidia; o__Flavobacteriales; f__Flavobacteriaceae; g__Flavobacterium; s__Flavobacterium degerlachei	yes	229203	yes	yes	0.0018	yes
GCA_000425445.1	Flavobacterium denitrificans DSM 15936	d__Bacteria; p__Bacteroidetes; c__Flavobacteriia; o__Flavobacteriales; f__Flavobacteriaceae; g__Flavobacterium; s__Flavobacterium denitrificans	d__Bacteria; p__Bacteroidota; c__Bacteroidia; o__Flavobacteriales; f__Flavobacteriaceae; g__Flavobacterium; s__Flavobacterium denitrificans	no
GCA_003634455.1	Flavobacterium endophyticum	d__Bacteria; p__Bacteroidetes; c__Flavobacteriia; o__Flavobacteriales; f__Flavobacteriaceae; g__Flavobacterium; s__Flavobacterium endophyticum	d__Bacteria; p__Bacteroidota; c__Bacteroidia; o__Flavobacteriales; f__Flavobacteriaceae; g__Flavobacterium; s__Flavobacterium endophyticum	yes	1540163	yes	yes	0.0017	yes
GCA_000498495.1	Flavobacterium enshiense DK69	d__Bacteria; p__Bacteroidetes; c__Flavobacteriia; o__Flavobacteriales; f__Flavobacteriaceae; g__Flavobacterium; s__Flavobacterium enshiense	d__Bacteria; p__Bacteroidota; c__Bacteroidia; o__Flavobacteriales; f__Flavobacteriaceae; g__Flavobacterium; s__Flavobacterium enshiense	yes	1107311	yes	yes	8.1e-05	yes
GCA_003076455.1	Flavobacterium faecale	d__Bacteria; p__Bacteroidetes; c__Flavobacteriia; o__Flavobacteriales; f__Flavobacteriaceae; g__Flavobacterium; s__Flavobacterium faecale	d__Bacteria; p__Bacteroidota; c__Bacteroidia; o__Flavobacteriales; f__Flavobacteriaceae; g__Flavobacterium; s__Flavobacterium faecale	yes	1355330	yes	yes	0.0013	yes
GCA_000425465.1	Flavobacterium filum DSM 17961	d__Bacteria; p__Bacteroidetes; c__Flavobacteriia; o__Flavobacteriales; f__Flavobacteriaceae; g__Flavobacterium; s__Flavobacterium filum	d__Bacteria; p__Bacteroidota; c__Bacteroidia; o__Flavobacteriales; f__Flavobacteriaceae; g__Flavobacterium; s__Flavobacterium filum	no
GCA_900142775.1	Flavobacterium flevense	d__Bacteria; p__Bacteroidetes; c__Flavobacteriia; o__Flavobacteriales; f__Flavobacteriaceae; g__Flavobacterium; s__Flavobacterium flevense	d__Bacteria; p__Bacteroidota; c__Bacteroidia; o__Flavobacteriales; f__Flavobacteriaceae; g__Flavobacterium; s__Flavobacterium flevense	yes	983	yes	yes	0.0018	yes
GCA_900129545.1	Flavobacterium fluvii	d__Bacteria; p__Bacteroidetes; c__Flavobacteriia; o__Flavobacteriales; f__Flavobacteriaceae; g__Flavobacterium; s__Flavobacterium fluvii	d__Bacteria; p__Bacteroidota; c__Bacteroidia; o__Flavobacteriales; f__Flavobacteriaceae; g__Flavobacterium; s__Flavobacterium fluvii	yes	468056	yes	yes	0.0018	yes
GCA_004634245.1	Flavobacterium foetidum	d__Bacteria; p__Bacteroidetes; c__Flavobacteriia; o__Flavobacteriales; f__Flavobacteriaceae; g__Flavobacterium; s__Flavobacterium foetidum	d__Bacteria; p__Bacteroidota; c__Bacteroidia; o__Flavobacteriales; f__Flavobacteriaceae; g__Flavobacterium; s__Flavobacterium foetidum	yes	2026681	yes	yes	0.0044	yes
GCA_900129405.1	Flavobacterium fontis	d__Bacteria; p__Bacteroidetes; c__Flavobacteriia; o__Flavobacteriales; f__Flavobacteriaceae; g__Flavobacterium; s__Flavobacterium fontis	d__Bacteria; p__Bacteroidota; c__Bacteroidia; o__Flavobacteriales; f__Flavobacteriaceae; g__Flavobacterium; s__Flavobacterium fontis	yes	1124188	no
GCA_000425505.1	Flavobacterium frigidarium DSM 17623	d__Bacteria; p__Bacteroidetes; c__Flavobacteriia; o__Flavobacteriales; f__Flavobacteriaceae; g__Flavobacterium; s__Flavobacterium frigidarium	d__Bacteria; p__Bacteroidota; c__Bacteroidia; o__Flavobacteriales; f__Flavobacteriaceae; g__Flavobacterium; s__Flavobacterium frigidarium	no
GCA_900129595.1	Flavobacterium frigidimaris	d__Bacteria; p__Bacteroidetes; c__Flavobacteriia; o__Flavobacteriales; f__Flavobacteriaceae; g__Flavobacterium; s__Flavobacterium frigidimaris	d__Bacteria; p__Bacteroidota; c__Bacteroidia; o__Flavobacteriales; f__Flavobacteriaceae; g__Flavobacterium; s__Flavobacterium frigidimaris	yes	262320	yes	yes	0.0018	yes
GCA_900111075.1	Flavobacterium frigoris	d__Bacteria; p__Bacteroidetes; c__Flavobacteriia; o__Flavobacteriales; f__Flavobacteriaceae; g__Flavobacterium; s__Flavobacterium frigoris	d__Bacteria; p__Bacteroidota; c__Bacteroidia; o__Flavobacteriales; f__Flavobacteriaceae; g__Flavobacterium; s__Flavobacterium frigoris	yes	229204	yes	yes	0.0018	yes
GCA_900143245.1	Flavobacterium fryxellicola	d__Bacteria; p__Bacteroidetes; c__Flavobacteriia; o__Flavobacteriales; f__Flavobacteriaceae; g__Flavobacterium; s__Flavobacterium fryxellicola	d__Bacteria; p__Bacteroidota; c__Bacteroidia; o__Flavobacteriales; f__Flavobacteriaceae; g__Flavobacterium; s__Flavobacterium fryxellicola	yes	249352	yes	yes	0.0018	yes
GCA_000422685.1	Flavobacterium gelidilacus DSM 15343	d__Bacteria; p__Bacteroidetes; c__Flavobacteriia; o__Flavobacteriales; f__Flavobacteriaceae; g__Flavobacterium; s__Flavobacterium gelidilacus	d__Bacteria; p__Bacteroidota; c__Bacteroidia; o__Flavobacteriales; f__Flavobacteriaceae; g__Flavobacterium; s__Flavobacterium gelidilacus	no
GCA_900107635.1	Flavobacterium gillisiae	d__Bacteria; p__Bacteroidetes; c__Flavobacteriia; o__Flavobacteriales; f__Flavobacteriaceae; g__Flavobacterium; s__Flavobacterium gillisiae	d__Bacteria; p__Bacteroidota; c__Bacteroidia; o__Flavobacteriales; f__Flavobacteriaceae; g__Flavobacterium; s__Flavobacterium gillisiae	yes	150146	yes	yes	0.0018	yes
GCA_001761465.1	Flavobacterium gilvum	d__Bacteria; p__Bacteroidetes; c__Flavobacteriia; o__Flavobacteriales; f__Flavobacteriaceae; g__Flavobacterium; s__Flavobacterium gilvum	d__Bacteria; p__Bacteroidota; c__Bacteroidia; o__Flavobacteriales; f__Flavobacteriaceae; g__Flavobacterium; s__Flavobacterium gilvum	yes	1492737	yes	yes	0.0017	yes
GCA_003254625.1	Flavobacterium ginsenosidimutans	d__Bacteria; p__Bacteroidetes; c__Flavobacteriia; o__Flavobacteriales; f__Flavobacteriaceae; g__Flavobacterium; s__Flavobacterium ginsenosidimutans	d__Bacteria; p__Bacteroidota; c__Bacteroidia; o__Flavobacteriales; f__Flavobacteriaceae; g__Flavobacterium; s__Flavobacterium ginsenosidimutans	yes	687844	yes	yes	0.0044	yes
GCA_003350545.1	Flavobacterium glaciei	d__Bacteria; p__Bacteroidetes; c__Flavobacteriia; o__Flavobacteriales; f__Flavobacteriaceae; g__Flavobacterium; s__Flavobacterium glaciei	d__Bacteria; p__Bacteroidota; c__Bacteroidia; o__Flavobacteriales; f__Flavobacteriaceae; g__Flavobacterium; s__Flavobacterium glaciei	yes	386300	yes	yes	0.0017	yes
GCA_900100165.1	Flavobacterium glycines	d__Bacteria; p__Bacteroidetes; c__Flavobacteriia; o__Flavobacteriales; f__Flavobacteriaceae; g__Flavobacterium; s__Flavobacterium glycines	d__Bacteria; p__Bacteroidota; c__Bacteroidia; o__Flavobacteriales; f__Flavobacteriaceae; g__Flavobacterium; s__Flavobacterium glycines	yes	551990	yes	yes	0.0018	yes
GCA_900129705.1	Flavobacterium granuli	d__Bacteria; p__Bacteroidetes; c__Flavobacteriia; o__Flavobacteriales; f__Flavobacteriaceae; g__Flavobacterium; s__Flavobacterium granuli	d__Bacteria; p__Bacteroidota; c__Bacteroidia; o__Flavobacteriales; f__Flavobacteriaceae; g__Flavobacterium; s__Flavobacterium granuli	yes	280093	yes	yes	0.0018	yes
GCA_900142055.1	Flavobacterium haoranii	d__Bacteria; p__Bacteroidetes; c__Flavobacteriia; o__Flavobacteriales; f__Flavobacteriaceae; g__Flavobacterium; s__Flavobacterium haoranii	d__Bacteria; p__Bacteroidota; c__Bacteroidia; o__Flavobacteriales; f__Flavobacteriaceae; g__Flavobacterium; s__Flavobacterium haoranii	yes	683124	yes	yes	0.0062	yes
GCA_002217285.1	Flavobacterium hercynium	d__Bacteria; p__Bacteroidetes; c__Flavobacteriia; o__Flavobacteriales; f__Flavobacteriaceae; g__Flavobacterium; s__Flavobacterium hercynium	d__Bacteria; p__Bacteroidota; c__Bacteroidia; o__Flavobacteriales; f__Flavobacteriaceae; g__Flavobacterium; s__Flavobacterium hercynium	yes	387094	yes	yes	0.0018	yes
GCA_000832125.1	Flavobacterium hibernum	d__Bacteria; p__Bacteroidetes; c__Flavobacteriia; o__Flavobacteriales; f__Flavobacteriaceae; g__Flavobacterium; s__Flavobacterium hibernum	d__Bacteria; p__Bacteroidota; c__Bacteroidia; o__Flavobacteriales; f__Flavobacteriaceae; g__Flavobacterium; s__Flavobacterium hibernum	yes	37752	yes	yes	0.0018	yes
GCA_000737695.1	Flavobacterium hydatis	d__Bacteria; p__Bacteroidetes; c__Flavobacteriia; o__Flavobacteriales; f__Flavobacteriaceae; g__Flavobacterium; s__Flavobacterium hydatis	d__Bacteria; p__Bacteroidota; c__Bacteroidia; o__Flavobacteriales; f__Flavobacteriaceae; g__Flavobacterium; s__Flavobacterium hydatis	yes	991	yes	yes	0.0018	yes
GCA_000455605.1	Flavobacterium indicum GPTSA100-9 = DSM 17447	d__Bacteria; p__Bacteroidetes; c__Flavobacteriia; o__Flavobacteriales; f__Flavobacteriaceae; g__Flavobacterium; s__Flavobacterium indicum	d__Bacteria; p__Bacteroidota; c__Bacteroidia; o__Flavobacteriales; f__Flavobacteriaceae; g__Flavobacterium; s__Flavobacterium indicum	yes	1094466	yes	yes	0.017	yes
GCA_006491595.1	Flavobacterium jejuense	d__Bacteria; p__Bacteroidetes; c__Flavobacteriia; o__Flavobacteriales; f__Flavobacteriaceae; g__Flavobacterium; s__Flavobacterium jejuense	d__Bacteria; p__Bacteroidota; c__Bacteroidia; o__Flavobacteriales; f__Flavobacteriaceae; g__Flavobacterium; s__Flavobacterium jejuense	no
GCA_000016645.1	Flavobacterium johnsoniae UW101	d__Bacteria; p__Bacteroidetes; c__Flavobacteriia; o__Flavobacteriales; f__Flavobacteriaceae; g__Flavobacterium; s__Flavobacterium johnsoniae	d__Bacteria; p__Bacteroidota; c__Bacteroidia; o__Flavobacteriales; f__Flavobacteriaceae; g__Flavobacterium; s__Flavobacterium johnsoniae	yes	376686	yes	yes	0.0044	yes
GCA_003076475.1	Flavobacterium kingsejongi	d__Bacteria; p__Bacteroidetes; c__Flavobacteriia; o__Flavobacteriales; f__Flavobacteriaceae; g__Flavobacterium; s__Flavobacterium kingsejongi	d__Bacteria; p__Bacteroidota; c__Bacteroidia; o__Flavobacteriales; f__Flavobacteriaceae; g__Flavobacterium; s__Flavobacterium kingsejongi	yes	1678728	yes	yes	0.0003	yes
GCA_003268815.1	Flavobacterium lacus	d__Bacteria; p__Bacteroidetes; c__Flavobacteriia; o__Flavobacteriales; f__Flavobacteriaceae; g__Flavobacterium; s__Flavobacterium lacus	d__Bacteria; p__Bacteroidota; c__Bacteroidia; o__Flavobacteriales; f__Flavobacteriaceae; g__Flavobacterium; s__Flavobacterium lacus	yes	1353778	yes	yes	0.0032	yes
GCA_003634755.1	Flavobacterium limicola	d__Bacteria; p__Bacteroidetes; c__Flavobacteriia; o__Flavobacteriales; f__Flavobacteriaceae; g__Flavobacterium; s__Flavobacterium limicola	d__Bacteria; p__Bacteroidota; c__Bacteroidia; o__Flavobacteriales; f__Flavobacteriaceae; g__Flavobacterium; s__Flavobacterium limicola	yes	180441	yes	yes	0.0013	yes
GCA_000498535.1	Flavobacterium limnosediminis JC2902	d__Bacteria; p__Bacteroidetes; c__Flavobacteriia; o__Flavobacteriales; f__Flavobacteriaceae; g__Flavobacterium; s__Flavobacterium limnosediminis	d__Bacteria; p__Bacteroidota; c__Bacteroidia; o__Flavobacteriales; f__Flavobacteriaceae; g__Flavobacterium; s__Flavobacterium limnosediminis	yes	1341181	yes	yes	8.1e-05	yes
GCA_002846575.1	Flavobacterium lindanitolerans	d__Bacteria; p__Bacteroidetes; c__Flavobacteriia; o__Flavobacteriales; f__Flavobacteriaceae; g__Flavobacterium; s__Flavobacterium lindanitolerans	d__Bacteria; p__Bacteroidota; c__Bacteroidia; o__Flavobacteriales; f__Flavobacteriaceae; g__Flavobacterium; s__Flavobacterium lindanitolerans	yes	428988	yes	yes	0.0017	yes
GCA_003055625.1	Flavobacterium magnum	d__Bacteria; p__Bacteroidetes; c__Flavobacteriia; o__Flavobacteriales; f__Flavobacteriaceae; g__Flavobacterium; s__Flavobacterium magnum	d__Bacteria; p__Bacteroidota; c__Bacteroidia; o__Flavobacteriales; f__Flavobacteriaceae; g__Flavobacterium; s__Flavobacterium magnum	yes	2162713	yes	yes	0.0021	yes
GCA_900129585.1	Flavobacterium micromati	d__Bacteria; p__Bacteroidetes; c__Flavobacteriia; o__Flavobacteriales; f__Flavobacteriaceae; g__Flavobacterium; s__Flavobacterium micromati	d__Bacteria; p__Bacteroidota; c__Bacteroidia; o__Flavobacteriales; f__Flavobacteriaceae; g__Flavobacterium; s__Flavobacterium micromati	yes	229205	yes	yes	0.0018	yes
GCA_003254565.1	Flavobacterium nitrogenifigens	d__Bacteria; p__Bacteroidetes; c__Flavobacteriia; o__Flavobacteriales; f__Flavobacteriaceae; g__Flavobacterium; s__Flavobacterium nitrogenifigens	d__Bacteria; p__Bacteroidota; c__Bacteroidia; o__Flavobacteriales; f__Flavobacteriaceae; g__Flavobacterium; s__Flavobacterium nitrogenifigens	yes	1617283	yes	yes	0.0044	yes
GCA_900100375.1	Flavobacterium noncentrifugens	d__Bacteria; p__Bacteroidetes; c__Flavobacteriia; o__Flavobacteriales; f__Flavobacteriaceae; g__Flavobacterium; s__Flavobacterium noncentrifugens	d__Bacteria; p__Bacteroidota; c__Bacteroidia; o__Flavobacteriales; f__Flavobacteriaceae; g__Flavobacterium; s__Flavobacterium noncentrifugens	yes	1128970	yes	yes	0.0015	yes
GCA_002217355.1	Flavobacterium oncorhynchi	d__Bacteria; p__Bacteroidetes; c__Flavobacteriia; o__Flavobacteriales; f__Flavobacteriaceae; g__Flavobacterium; s__Flavobacterium oncorhynchi	d__Bacteria; p__Bacteroidota; c__Bacteroidia; o__Flavobacteriales; f__Flavobacteriaceae; g__Flavobacterium; s__Flavobacterium oncorhynchi	yes	728056	yes	yes	0.0044	yes
GCA_003097535.1	Flavobacterium pallidum	d__Bacteria; p__Bacteroidetes; c__Flavobacteriia; o__Flavobacteriales; f__Flavobacteriaceae; g__Flavobacterium; s__Flavobacterium pallidum	d__Bacteria; p__Bacteroidota; c__Bacteroidia; o__Flavobacteriales; f__Flavobacteriaceae; g__Flavobacterium; s__Flavobacterium pallidum	yes	2172098	yes	yes	0.0013	yes
GCA_900142715.1	Flavobacterium pectinovorum	d__Bacteria; p__Bacteroidetes; c__Flavobacteriia; o__Flavobacteriales; f__Flavobacteriaceae; g__Flavobacterium; s__Flavobacterium pectinovorum	d__Bacteria; p__Bacteroidota; c__Bacteroidia; o__Flavobacteriales; f__Flavobacteriaceae; g__Flavobacterium; s__Flavobacterium pectinovorum	yes	29533	yes	yes	0.0018	yes
GCA_900112575.1	Flavobacterium phragmitis	d__Bacteria; p__Bacteroidetes; c__Flavobacteriia; o__Flavobacteriales; f__Flavobacteriaceae; g__Flavobacterium; s__Flavobacterium phragmitis	d__Bacteria; p__Bacteroidota; c__Bacteroidia; o__Flavobacteriales; f__Flavobacteriaceae; g__Flavobacterium; s__Flavobacterium phragmitis	yes	739143	yes	yes	0.0044	yes
GCA_001686925.1	Flavobacterium piscis	d__Bacteria; p__Bacteroidetes; c__Flavobacteriia; o__Flavobacteriales; f__Flavobacteriaceae; g__Flavobacterium; s__Flavobacterium piscis	d__Bacteria; p__Bacteroidota; c__Bacteroidia; o__Flavobacteriales; f__Flavobacteriaceae; g__Flavobacterium; s__Flavobacterium piscis	yes	1114874	yes	yes	0.0018	yes
GCA_002217395.1	Flavobacterium plurextorum	d__Bacteria; p__Bacteroidetes; c__Flavobacteriia; o__Flavobacteriales; f__Flavobacteriaceae; g__Flavobacterium; s__Flavobacterium plurextorum	d__Bacteria; p__Bacteroidota; c__Bacteroidia; o__Flavobacteriales; f__Flavobacteriaceae; g__Flavobacterium; s__Flavobacterium plurextorum	yes	1114867	yes	yes	0.0044	yes
GCA_003312425.1	Flavobacterium psychrolimnae	d__Bacteria; p__Bacteroidetes; c__Flavobacteriia; o__Flavobacteriales; f__Flavobacteriaceae; g__Flavobacterium; s__Flavobacterium psychrolimnae	d__Bacteria; p__Bacteroidota; c__Bacteroidia; o__Flavobacteriales; f__Flavobacteriaceae; g__Flavobacterium; s__Flavobacterium psychrolimnae	yes	249351	yes	yes	0.0013	yes
GCA_002217405.1	Flavobacterium psychrophilum DSM 3660 = ATCC 49418	d__Bacteria; p__Bacteroidetes; c__Flavobacteriia; o__Flavobacteriales; f__Flavobacteriaceae; g__Flavobacterium; s__Flavobacterium psychrophilum	d__Bacteria; p__Bacteroidota; c__Bacteroidia; o__Flavobacteriales; f__Flavobacteriaceae; g__Flavobacterium; s__Flavobacterium psychrophilum	yes	1121894	yes	yes	0.0039	yes
GCA_002217435.1	Flavobacterium reichenbachii	d__Bacteria; p__Bacteroidetes; c__Flavobacteriia; o__Flavobacteriales; f__Flavobacteriaceae; g__Flavobacterium; s__Flavobacterium reichenbachii	d__Bacteria; p__Bacteroidota; c__Bacteroidia; o__Flavobacteriales; f__Flavobacteriaceae; g__Flavobacterium; s__Flavobacterium reichenbachii	yes	362418	yes	yes	0.0018	yes
GCA_900182645.1	Flavobacterium resistens	d__Bacteria; p__Bacteroidetes; c__Flavobacteriia; o__Flavobacteriales; f__Flavobacteriaceae; g__Flavobacterium; s__Flavobacterium resistens	d__Bacteria; p__Bacteroidota; c__Bacteroidia; o__Flavobacteriales; f__Flavobacteriaceae; g__Flavobacterium; s__Flavobacterium resistens	yes	443612	yes	yes	0.0044	yes
GCA_000378485.1	Flavobacterium rivuli WB 3.3-2 = DSM 21788	d__Bacteria; p__Bacteroidetes; c__Flavobacteriia; o__Flavobacteriales; f__Flavobacteriaceae; g__Flavobacterium; s__Flavobacterium rivuli	d__Bacteria; p__Bacteroidota; c__Bacteroidia; o__Flavobacteriales; f__Flavobacteriaceae; g__Flavobacterium; s__Flavobacterium rivuli	no
GCA_900142735.1	Flavobacterium saccharophilum	d__Bacteria; p__Bacteroidetes; c__Flavobacteriia; o__Flavobacteriales; f__Flavobacteriaceae; g__Flavobacterium; s__Flavobacterium saccharophilum	d__Bacteria; p__Bacteroidota; c__Bacteroidia; o__Flavobacteriales; f__Flavobacteriaceae; g__Flavobacterium; s__Flavobacterium saccharophilum	yes	29534	yes	yes	0.0018	yes
GCA_900100625.1	Flavobacterium saliperosum	d__Bacteria; p__Bacteroidetes; c__Flavobacteriia; o__Flavobacteriales; f__Flavobacteriaceae; g__Flavobacterium; s__Flavobacterium saliperosum	d__Bacteria; p__Bacteroidota; c__Bacteroidia; o__Flavobacteriales; f__Flavobacteriaceae; g__Flavobacterium; s__Flavobacterium saliperosum	yes	329186	yes	yes	8.1e-05	yes
GCA_000686885.1	Flavobacterium sasangense DSM 21067	d__Bacteria; p__Bacteroidetes; c__Flavobacteriia; o__Flavobacteriales; f__Flavobacteriaceae; g__Flavobacterium; s__Flavobacterium sasangense	d__Bacteria; p__Bacteroidota; c__Bacteroidia; o__Flavobacteriales; f__Flavobacteriaceae; g__Flavobacterium; s__Flavobacterium sasangense	no
GCA_003148385.1	Flavobacterium sediminis	d__Bacteria; p__Bacteroidetes; c__Flavobacteriia; o__Flavobacteriales; f__Flavobacteriaceae; g__Flavobacterium; s__Flavobacterium sediminis	d__Bacteria; p__Bacteroidota; c__Bacteroidia; o__Flavobacteriales; f__Flavobacteriaceae; g__Flavobacterium; s__Flavobacterium sediminis	yes	2201181	yes	yes	0.0015	yes
GCA_900129575.1	Flavobacterium segetis	d__Bacteria; p__Bacteroidetes; c__Flavobacteriia; o__Flavobacteriales; f__Flavobacteriaceae; g__Flavobacterium; s__Flavobacterium segetis	d__Bacteria; p__Bacteroidota; c__Bacteroidia; o__Flavobacteriales; f__Flavobacteriaceae; g__Flavobacterium; s__Flavobacterium segetis	yes	271157	yes	yes	0.0018	yes
GCA_000695795.1	Flavobacterium seoulense	d__Bacteria; p__Bacteroidetes; c__Flavobacteriia; o__Flavobacteriales; f__Flavobacteriaceae; g__Flavobacterium; s__Flavobacterium seoulense	d__Bacteria; p__Bacteroidota; c__Bacteroidia; o__Flavobacteriales; f__Flavobacteriaceae; g__Flavobacterium; s__Flavobacterium seoulense	yes	1492738	yes	yes	0.0018	yes
GCA_900110375.1	Flavobacterium sinopsychrotolerans	d__Bacteria; p__Bacteroidetes; c__Flavobacteriia; o__Flavobacteriales; f__Flavobacteriaceae; g__Flavobacterium; s__Flavobacterium sinopsychrotolerans	d__Bacteria; p__Bacteroidota; c__Bacteroidia; o__Flavobacteriales; f__Flavobacteriaceae; g__Flavobacterium; s__Flavobacterium sinopsychrotolerans	yes	604089	yes	yes	0.0013	yes
GCA_000422705.1	Flavobacterium soli DSM 19725	d__Bacteria; p__Bacteroidetes; c__Flavobacteriia; o__Flavobacteriales; f__Flavobacteriaceae; g__Flavobacterium; s__Flavobacterium soli	d__Bacteria; p__Bacteroidota; c__Bacteroidia; o__Flavobacteriales; f__Flavobacteriaceae; g__Flavobacterium; s__Flavobacterium soli	no
GCA_000422725.1	Flavobacterium subsaxonicum WB 4.1-42 = DSM 21790	d__Bacteria; p__Bacteroidetes; c__Flavobacteriia; o__Flavobacteriales; f__Flavobacteriaceae; g__Flavobacterium; s__Flavobacterium subsaxonicum	d__Bacteria; p__Bacteroidota; c__Bacteroidia; o__Flavobacteriales; f__Flavobacteriaceae; g__Flavobacterium; s__Flavobacterium subsaxonicum	no
GCA_000611675.1	Flavobacterium succinicans LMG 10402	d__Bacteria; p__Bacteroidetes; c__Flavobacteriia; o__Flavobacteriales; f__Flavobacteriaceae; g__Flavobacterium; s__Flavobacterium succinicans	d__Bacteria; p__Bacteroidota; c__Bacteroidia; o__Flavobacteriales; f__Flavobacteriaceae; g__Flavobacterium; s__Flavobacterium succinicans	no
GCA_000430025.1	Flavobacterium suncheonense GH29-5 = DSM 17707	d__Bacteria; p__Bacteroidetes; c__Flavobacteriia; o__Flavobacteriales; f__Flavobacteriaceae; g__Flavobacterium; s__Flavobacterium suncheonense	d__Bacteria; p__Bacteroidota; c__Bacteroidia; o__Flavobacteriales; f__Flavobacteriaceae; g__Flavobacterium; s__Flavobacterium suncheonense	no
GCA_900111965.1	Flavobacterium swingsii	d__Bacteria; p__Bacteroidetes; c__Flavobacteriia; o__Flavobacteriales; f__Flavobacteriaceae; g__Flavobacterium; s__Flavobacterium swingsii	d__Bacteria; p__Bacteroidota; c__Bacteroidia; o__Flavobacteriales; f__Flavobacteriaceae; g__Flavobacterium; s__Flavobacterium swingsii	yes	498292	yes	yes	0.0019	yes
GCA_000425485.1	Flavobacterium tegetincola DSM 22377	d__Bacteria; p__Bacteroidetes; c__Flavobacteriia; o__Flavobacteriales; f__Flavobacteriaceae; g__Flavobacterium; s__Flavobacterium tegetincola	d__Bacteria; p__Bacteroidota; c__Bacteroidia; o__Flavobacteriales; f__Flavobacteriaceae; g__Flavobacterium; s__Flavobacterium tegetincola	no
GCA_900142035.1	Flavobacterium terrae	d__Bacteria; p__Bacteroidetes; c__Flavobacteriia; o__Flavobacteriales; f__Flavobacteriaceae; g__Flavobacterium; s__Flavobacterium terrae	d__Bacteria; p__Bacteroidota; c__Bacteroidia; o__Flavobacteriales; f__Flavobacteriaceae; g__Flavobacterium; s__Flavobacterium terrae	yes	415425	yes	yes	0.0058	yes
GCA_900108955.1	Flavobacterium terrigena	d__Bacteria; p__Bacteroidetes; c__Flavobacteriia; o__Flavobacteriales; f__Flavobacteriaceae; g__Flavobacterium; s__Flavobacterium terrigena	d__Bacteria; p__Bacteroidota; c__Bacteroidia; o__Flavobacteriales; f__Flavobacteriaceae; g__Flavobacterium; s__Flavobacterium terrigena	yes	402734	yes	yes	0.0015	yes
GCA_003293845.1	Flavobacterium tibetense	d__Bacteria; p__Bacteroidetes; c__Flavobacteriia; o__Flavobacteriales; f__Flavobacteriaceae; g__Flavobacterium; s__Flavobacterium tibetense	d__Bacteria; p__Bacteroidota; c__Bacteroidia; o__Flavobacteriales; f__Flavobacteriaceae; g__Flavobacterium; s__Flavobacterium tibetense	yes	2233533	yes	yes	0.0034	yes
GCA_003254545.1	Flavobacterium tistrianum	d__Bacteria; p__Bacteroidetes; c__Flavobacteriia; o__Flavobacteriales; f__Flavobacteriaceae; g__Flavobacterium; s__Flavobacterium tistrianum	d__Bacteria; p__Bacteroidota; c__Bacteroidia; o__Flavobacteriales; f__Flavobacteriaceae; g__Flavobacterium; s__Flavobacterium tistrianum	yes	1685414	yes	yes	0.0044	yes
GCA_002217475.1	Flavobacterium tructae	d__Bacteria; p__Bacteroidetes; c__Flavobacteriia; o__Flavobacteriales; f__Flavobacteriaceae; g__Flavobacterium; s__Flavobacterium tructae	d__Bacteria; p__Bacteroidota; c__Bacteroidia; o__Flavobacteriales; f__Flavobacteriaceae; g__Flavobacterium; s__Flavobacterium tructae	yes	1114873	yes	yes	0.0018	yes
GCA_900110615.1	Flavobacterium urocaniciphilum	d__Bacteria; p__Bacteroidetes; c__Flavobacteriia; o__Flavobacteriales; f__Flavobacteriaceae; g__Flavobacterium; s__Flavobacterium urocaniciphilum	d__Bacteria; p__Bacteroidota; c__Bacteroidia; o__Flavobacteriales; f__Flavobacteriaceae; g__Flavobacterium; s__Flavobacterium urocaniciphilum	yes	1299341	yes	yes	0.0015	yes
GCA_900108015.1	Flavobacterium urumqiense	d__Bacteria; p__Bacteroidetes; c__Flavobacteriia; o__Flavobacteriales; f__Flavobacteriaceae; g__Flavobacterium; s__Flavobacterium urumqiense	d__Bacteria; p__Bacteroidota; c__Bacteroidia; o__Flavobacteriales; f__Flavobacteriaceae; g__Flavobacterium; s__Flavobacterium urumqiense	yes	935224	yes	yes	0.0018	yes
GCA_003688495.1	Flavobacterium weaverense	d__Bacteria; p__Bacteroidetes; c__Flavobacteriia; o__Flavobacteriales; f__Flavobacteriaceae; g__Flavobacterium; s__Flavobacterium weaverense	d__Bacteria; p__Bacteroidota; c__Bacteroidia; o__Flavobacteriales; f__Flavobacteriaceae; g__Flavobacterium; s__Flavobacterium weaverense	yes	271156	yes	yes	0.0018	yes
GCA_900142695.1	Flavobacterium xanthum	d__Bacteria; p__Bacteroidetes; c__Flavobacteriia; o__Flavobacteriales; f__Flavobacteriaceae; g__Flavobacterium; s__Flavobacterium xanthum	d__Bacteria; p__Bacteroidota; c__Bacteroidia; o__Flavobacteriales; f__Flavobacteriaceae; g__Flavobacterium; s__Flavobacterium xanthum	yes	69322	yes	yes	0.0013	yes
GCA_900142885.1	Flavobacterium xinjiangense	d__Bacteria; p__Bacteroidetes; c__Flavobacteriia; o__Flavobacteriales; f__Flavobacteriaceae; g__Flavobacterium; s__Flavobacterium xinjiangense	d__Bacteria; p__Bacteroidota; c__Bacteroidia; o__Flavobacteriales; f__Flavobacteriaceae; g__Flavobacterium; s__Flavobacterium xinjiangense	yes	178356	yes	yes	0.0018	yes
GCA_900112975.1	Flavobacterium xueshanense	d__Bacteria; p__Bacteroidetes; c__Flavobacteriia; o__Flavobacteriales; f__Flavobacteriaceae; g__Flavobacterium; s__Flavobacterium xueshanense	d__Bacteria; p__Bacteroidota; c__Bacteroidia; o__Flavobacteriales; f__Flavobacteriaceae; g__Flavobacterium; s__Flavobacterium xueshanense	yes	935223	yes	yes	0.0013	yes
GCA_000723205.1	Formosa agariphila KMM 3901	d__Bacteria; p__Bacteroidetes; c__Flavobacteriia; o__Flavobacteriales; f__Flavobacteriaceae; g__Formosa; s__Formosa agariphila	d__Bacteria; p__Bacteroidota; c__Bacteroidia; o__Flavobacteriales; f__Flavobacteriaceae; g__Formosa; s__Formosa agariphila	yes	1347342	yes	yes	4.5e-05	yes
GCA_001439665.1	Formosa algae	d__Bacteria; p__Bacteroidetes; c__Flavobacteriia; o__Flavobacteriales; f__Flavobacteriaceae; g__Formosa; s__Formosa algae	d__Bacteria; p__Bacteroidota; c__Bacteroidia; o__Flavobacteriales; f__Flavobacteriaceae; g__Formosa; s__Formosa algae	yes	225843	yes	yes	9e-05	yes
GCA_001685485.1	Formosa haliotis	d__Bacteria; p__Bacteroidetes; c__Flavobacteriia; o__Flavobacteriales; f__Flavobacteriaceae; g__Formosa; s__Formosa haliotis	d__Bacteria; p__Bacteroidota; c__Bacteroidia; o__Flavobacteriales; f__Flavobacteriaceae; g__Formosa; s__Formosa haliotis	no
GCA_000425645.1	Gaetbulibacter saemankumensis DSM 17032	d__Bacteria; p__Bacteroidetes; c__Flavobacteriia; o__Flavobacteriales; f__Flavobacteriaceae; g__Gaetbulibacter; s__Gaetbulibacter saemankumensis	d__Bacteria; p__Bacteroidota; c__Bacteroidia; o__Flavobacteriales; f__Flavobacteriaceae; g__Gaetbulibacter; s__Gaetbulibacter saemankumensis	no
GCA_000300875.1	Galbibacter marinus	d__Bacteria; p__Bacteroidetes; c__Flavobacteriia; o__Flavobacteriales; f__Flavobacteriaceae; g__Galbibacter; s__Galbibacter marinus	d__Bacteria; p__Bacteroidota; c__Bacteroidia; o__Flavobacteriales; f__Flavobacteriaceae; g__Galbibacter; s__Galbibacter marinus	yes	555500	yes	no		no
GCA_001678675.1	Gelidibacter algens	d__Bacteria; p__Bacteroidetes; c__Flavobacteriia; o__Flavobacteriales; f__Flavobacteriaceae; g__Gelidibacter; s__Gelidibacter algens	d__Bacteria; p__Bacteroidota; c__Bacteroidia; o__Flavobacteriales; f__Flavobacteriaceae; g__Gelidibacter; s__Gelidibacter algens	yes	49280	yes	yes	0.00038	yes
GCA_004115975.1	Gelidibacter gilvus	d__Bacteria; p__Bacteroidetes; c__Flavobacteriia; o__Flavobacteriales; f__Flavobacteriaceae; g__Gelidibacter; s__Gelidibacter gilvus	d__Bacteria; p__Bacteroidota; c__Bacteroidia; o__Flavobacteriales; f__Flavobacteriaceae; g__Gelidibacter; s__Gelidibacter gilvus	yes	59602	yes	yes	0.005	yes
GCA_000423005.1	Gelidibacter mesophilus DSM 14095	d__Bacteria; p__Bacteroidetes; c__Flavobacteriia; o__Flavobacteriales; f__Flavobacteriaceae; g__Gelidibacter; s__Gelidibacter mesophilus	d__Bacteria; p__Bacteroidota; c__Bacteroidia; o__Flavobacteriales; f__Flavobacteriaceae; g__Gelidibacter; s__Gelidibacter mesophilus	no
GCA_004364975.1	Gelidibacter sediminis	d__Bacteria; p__Bacteroidetes; c__Flavobacteriia; o__Flavobacteriales; f__Flavobacteriaceae; g__Gelidibacter; s__Gelidibacter sediminis	d__Bacteria; p__Bacteroidota; c__Bacteroidia; o__Flavobacteriales; f__Flavobacteriaceae; g__Gelidibacter; s__Gelidibacter sediminis	yes	1608710	yes	yes	0.00038	yes
GCA_000243235.1	Gillisia limnaea DSM 15749	d__Bacteria; p__Bacteroidetes; c__Flavobacteriia; o__Flavobacteriales; f__Flavobacteriaceae; g__Gillisia; s__Gillisia limnaea	d__Bacteria; p__Bacteroidota; c__Bacteroidia; o__Flavobacteriales; f__Flavobacteriaceae; g__Gillisia; s__Gillisia limnaea	yes	865937	yes	yes	0.00073	yes
GCA_000258765.1	Gillisia marina	d__Bacteria; p__Bacteroidetes; c__Flavobacteriia; o__Flavobacteriales; f__Flavobacteriaceae; g__Gillisia; s__Gillisia marina	d__Bacteria; p__Bacteroidota; c__Bacteroidia; o__Flavobacteriales; f__Flavobacteriaceae; g__Gillisia; s__Gillisia marina	no
GCA_003634585.1	Gillisia mitskevichiae	d__Bacteria; p__Bacteroidetes; c__Flavobacteriia; o__Flavobacteriales; f__Flavobacteriaceae; g__Gillisia; s__Gillisia mitskevichiae	d__Bacteria; p__Bacteroidota; c__Bacteroidia; o__Flavobacteriales; f__Flavobacteriaceae; g__Gillisia; s__Gillisia mitskevichiae	yes	270921	yes	yes	0.00056	yes
GCA_000423065.1	Gramella echinicola DSM 19838	d__Bacteria; p__Bacteroidetes; c__Flavobacteriia; o__Flavobacteriales; f__Flavobacteriaceae; g__Gramella; s__Gramella echinicola	d__Bacteria; p__Bacteroidota; c__Bacteroidia; o__Flavobacteriales; f__Flavobacteriaceae; g__Gramella; s__Gramella echinicola	no
GCA_001951155.1	Gramella flava JLT2011	d__Bacteria; p__Bacteroidetes; c__Flavobacteriia; o__Flavobacteriales; f__Flavobacteriaceae; g__Gramella; s__Gramella flava	d__Bacteria; p__Bacteroidota; c__Bacteroidia; o__Flavobacteriales; f__Flavobacteriaceae; g__Gramella; s__Gramella flava	yes	1229726	yes	yes	0.0051	yes
GCA_000060345.1	Gramella forsetii KT0803	d__Bacteria; p__Bacteroidetes; c__Flavobacteriia; o__Flavobacteriales; f__Flavobacteriaceae; g__Gramella; s__Gramella forsetii	d__Bacteria; p__Bacteroidota; c__Bacteroidia; o__Flavobacteriales; f__Flavobacteriaceae; g__Gramella; s__Gramella forsetii	yes	411154	yes	yes	0.0017	yes
GCA_003054225.1	Gramella gaetbulicola	d__Bacteria; p__Bacteroidetes; c__Flavobacteriia; o__Flavobacteriales; f__Flavobacteriaceae; g__Gramella; s__Gramella gaetbulicola	d__Bacteria; p__Bacteroidota; c__Bacteroidia; o__Flavobacteriales; f__Flavobacteriaceae; g__Gramella; s__Gramella gaetbulicola	yes	703340	yes	yes	0.0017	yes
GCA_000423045.1	Gramella portivictoriae DSM 23547	d__Bacteria; p__Bacteroidetes; c__Flavobacteriia; o__Flavobacteriales; f__Flavobacteriaceae; g__Gramella; s__Gramella portivictoriae	d__Bacteria; p__Bacteroidota; c__Bacteroidia; o__Flavobacteriales; f__Flavobacteriaceae; g__Gramella; s__Gramella portivictoriae	no
GCA_001889005.1	Gramella salexigens	d__Bacteria; p__Bacteroidetes; c__Flavobacteriia; o__Flavobacteriales; f__Flavobacteriaceae; g__Gramella; s__Gramella salexigens	d__Bacteria; p__Bacteroidota; c__Bacteroidia; o__Flavobacteriales; f__Flavobacteriaceae; g__Gramella; s__Gramella salexigens	yes	1913577	yes	yes	2.3e-05	yes
GCA_002940745.1	Hanstruepera crassostreae	d__Bacteria; p__Bacteroidetes; c__Flavobacteriia; o__Flavobacteriales; f__Flavobacteriaceae; g__Hanstruepera; s__Hanstruepera crassostreae	d__Bacteria; p__Bacteroidota; c__Bacteroidia; o__Flavobacteriales; f__Flavobacteriaceae; g__Hanstruepera; s__Hanstruepera crassostreae	no
GCA_002895005.1	Hanstruepera neustonica	d__Bacteria; p__Bacteroidetes; c__Flavobacteriia; o__Flavobacteriales; f__Flavobacteriaceae; g__Hanstruepera; s__Hanstruepera neustonica	d__Bacteria; p__Bacteroidota; c__Bacteroidia; o__Flavobacteriales; f__Flavobacteriaceae; g__Hanstruepera; s__Hanstruepera neustonica	yes	1445657	yes	yes	0.0021	yes
GCA_003610635.1	Ichthyenterobacterium magnum	d__Bacteria; p__Bacteroidetes; c__Flavobacteriia; o__Flavobacteriales; f__Flavobacteriaceae; g__Ichthyenterobacterium; s__Ichthyenterobacterium magnum	d__Bacteria; p__Bacteroidota; c__Bacteroidia; o__Flavobacteriales; f__Flavobacteriaceae; g__Ichthyenterobacterium; s__Ichthyenterobacterium magnum	yes	1230530	yes	yes	5.2e-05	yes
GCA_000260835.1	Imtechella halotolerans K1	d__Bacteria; p__Bacteroidetes; c__Flavobacteriia; o__Flavobacteriales; f__Flavobacteriaceae; g__Imtechella; s__Imtechella halotolerans	d__Bacteria; p__Bacteroidota; c__Bacteroidia; o__Flavobacteriales; f__Flavobacteriaceae; g__Imtechella; s__Imtechella halotolerans	yes	946077	yes	yes	0.00016	yes
GCA_900111025.1	Hyunsoonleella jejuensis	d__Bacteria; p__Bacteroidetes; c__Flavobacteriia; o__Flavobacteriales; f__Flavobacteriaceae; g__Hyunsoonleella; s__Hyunsoonleella jejuensis	d__Bacteria; p__Bacteroidota; c__Bacteroidia; o__Flavobacteriales; f__Flavobacteriaceae; g__Jejuia; s__Jejuia jejuensis	yes	419940	yes	yes	0.0016	yes
GCA_004310335.1	Hyunsoonleella pacifica	d__Bacteria; p__Bacteroidetes; c__Flavobacteriia; o__Flavobacteriales; f__Flavobacteriaceae; g__Hyunsoonleella; s__Hyunsoonleella pacifica	d__Bacteria; p__Bacteroidota; c__Bacteroidia; o__Flavobacteriales; f__Flavobacteriaceae; g__Jejuia; s__Jejuia pacifica	yes	1080224	yes	yes	0.00061	yes
GCA_002973595.1	Jejuia pallidilutea	d__Bacteria; p__Bacteroidetes; c__Flavobacteriia; o__Flavobacteriales; f__Flavobacteriaceae; g__Jejuia; s__Jejuia pallidilutea	d__Bacteria; p__Bacteroidota; c__Bacteroidia; o__Flavobacteriales; f__Flavobacteriaceae; g__Jejuia; s__Jejuia pallidilutea	yes	504487	yes	yes	0.00031	yes
GCA_000260115.1	Joostella marina DSM 19592	d__Bacteria; p__Bacteroidetes; c__Flavobacteriia; o__Flavobacteriales; f__Flavobacteriaceae; g__Joostella; s__Joostella marina	d__Bacteria; p__Bacteroidota; c__Bacteroidia; o__Flavobacteriales; f__Flavobacteriaceae; g__Joostella; s__Joostella marina	yes	926559	yes	no		no
GCA_000154725.1	Kordia algicida OT-1	d__Bacteria; p__Bacteroidetes; c__Flavobacteriia; o__Flavobacteriales; f__Flavobacteriaceae; g__Kordia; s__Kordia algicida	d__Bacteria; p__Bacteroidota; c__Bacteroidia; o__Flavobacteriales; f__Flavobacteriaceae; g__Kordia; s__Kordia algicida	yes	391587	yes	yes	0.00031	yes
GCA_001005315.1	Kordia jejudonensis	d__Bacteria; p__Bacteroidetes; c__Flavobacteriia; o__Flavobacteriales; f__Flavobacteriaceae; g__Kordia; s__Kordia jejudonensis	d__Bacteria; p__Bacteroidota; c__Bacteroidia; o__Flavobacteriales; f__Flavobacteriaceae; g__Kordia; s__Kordia jejudonensis	no
GCA_003054265.1	Kordia periserrulae	d__Bacteria; p__Bacteroidetes; c__Flavobacteriia; o__Flavobacteriales; f__Flavobacteriaceae; g__Kordia; s__Kordia periserrulae	d__Bacteria; p__Bacteroidota; c__Bacteroidia; o__Flavobacteriales; f__Flavobacteriaceae; g__Kordia; s__Kordia periserrulae	yes	701523	yes	yes	9.1e-05	yes
GCA_001005305.1	Kordia zhangzhouensis	d__Bacteria; p__Bacteroidetes; c__Flavobacteriia; o__Flavobacteriales; f__Flavobacteriaceae; g__Kordia; s__Kordia zhangzhouensis	d__Bacteria; p__Bacteroidota; c__Bacteroidia; o__Flavobacteriales; f__Flavobacteriaceae; g__Kordia; s__Kordia zhangzhouensis	no
GCA_900103215.1	Kriegella aquimaris	d__Bacteria; p__Bacteroidetes; c__Flavobacteriia; o__Flavobacteriales; f__Flavobacteriaceae; g__Kriegella; s__Kriegella aquimaris	d__Bacteria; p__Bacteroidota; c__Bacteroidia; o__Flavobacteriales; f__Flavobacteriaceae; g__Kriegella; s__Kriegella aquimaris	yes	192904	yes	yes	0.012	yes
GCA_001418085.1	Lacinutrix algicola	d__Bacteria; p__Bacteroidetes; c__Flavobacteriia; o__Flavobacteriales; f__Flavobacteriaceae; g__Lacinutrix; s__Lacinutrix algicola	d__Bacteria; p__Bacteroidota; c__Bacteroidia; o__Flavobacteriales; f__Flavobacteriaceae; g__Lacinutrix; s__Lacinutrix algicola	no
GCA_000797445.1	Lacinutrix jangbogonensis	d__Bacteria; p__Bacteroidetes; c__Flavobacteriia; o__Flavobacteriales; f__Flavobacteriaceae; g__Lacinutrix; s__Lacinutrix jangbogonensis	d__Bacteria; p__Bacteroidota; c__Bacteroidia; o__Flavobacteriales; f__Flavobacteriaceae; g__Lacinutrix; s__Lacinutrix jangbogonensis	no
GCA_001418015.1	Lacinutrix mariniflava	d__Bacteria; p__Bacteroidetes; c__Flavobacteriia; o__Flavobacteriales; f__Flavobacteriaceae; g__Lacinutrix; s__Lacinutrix mariniflava	d__Bacteria; p__Bacteroidota; c__Bacteroidia; o__Flavobacteriales; f__Flavobacteriaceae; g__Lacinutrix; s__Lacinutrix mariniflava	no
GCA_003663945.1	Lacinutrix venerupis	d__Bacteria; p__Bacteroidetes; c__Flavobacteriia; o__Flavobacteriales; f__Flavobacteriaceae; g__Lacinutrix; s__Lacinutrix venerupis	d__Bacteria; p__Bacteroidota; c__Bacteroidia; o__Flavobacteriales; f__Flavobacteriaceae; g__Lacinutrix; s__Lacinutrix venerupis	yes	1486034	yes	yes	2e-05	yes
GCA_004104375.1	Leeuwenhoekiella aequorea	d__Bacteria; p__Bacteroidetes; c__Flavobacteriia; o__Flavobacteriales; f__Flavobacteriaceae; g__Leeuwenhoekiella; s__Leeuwenhoekiella aequorea	d__Bacteria; p__Bacteroidota; c__Bacteroidia; o__Flavobacteriales; f__Flavobacteriaceae; g__Leeuwenhoekiella; s__Leeuwenhoekiella aequorea	yes	283736	yes	no		no
GCA_000152985.1	Leeuwenhoekiella blandensis MED217	d__Bacteria; p__Bacteroidetes; c__Flavobacteriia; o__Flavobacteriales; f__Flavobacteriaceae; g__Leeuwenhoekiella; s__Leeuwenhoekiella blandensis	d__Bacteria; p__Bacteroidota; c__Bacteroidia; o__Flavobacteriales; f__Flavobacteriaceae; g__Leeuwenhoekiella; s__Leeuwenhoekiella blandensis	yes	398720	yes	no		no
GCA_900129005.1	Leeuwenhoekiella marinoflava DSM 3653	d__Bacteria; p__Bacteroidetes; c__Flavobacteriia; o__Flavobacteriales; f__Flavobacteriaceae; g__Leeuwenhoekiella; s__Leeuwenhoekiella marinoflava	d__Bacteria; p__Bacteroidota; c__Bacteroidia; o__Flavobacteriales; f__Flavobacteriaceae; g__Leeuwenhoekiella; s__Leeuwenhoekiella marinoflava	yes	1122159	yes	no		no
GCA_002744755.1	Leeuwenhoekiella nanhaiensis	d__Bacteria; p__Bacteroidetes; c__Flavobacteriia; o__Flavobacteriales; f__Flavobacteriaceae; g__Leeuwenhoekiella; s__Leeuwenhoekiella nanhaiensis	d__Bacteria; p__Bacteroidota; c__Bacteroidia; o__Flavobacteriales; f__Flavobacteriaceae; g__Leeuwenhoekiella; s__Leeuwenhoekiella nanhaiensis	yes	1655491	yes	no		no
GCA_900130045.1	Leeuwenhoekiella palythoae	d__Bacteria; p__Bacteroidetes; c__Flavobacteriia; o__Flavobacteriales; f__Flavobacteriaceae; g__Leeuwenhoekiella; s__Leeuwenhoekiella palythoae	d__Bacteria; p__Bacteroidota; c__Bacteroidia; o__Flavobacteriales; f__Flavobacteriaceae; g__Leeuwenhoekiella; s__Leeuwenhoekiella palythoae	yes	573501	yes	no		no
GCA_900188235.1	Lutibacter agarilyticus	d__Bacteria; p__Bacteroidetes; c__Flavobacteriia; o__Flavobacteriales; f__Flavobacteriaceae; g__Lutibacter; s__Lutibacter agarilyticus	d__Bacteria; p__Bacteroidota; c__Bacteroidia; o__Flavobacteriales; f__Flavobacteriaceae; g__Lutibacter; s__Lutibacter agarilyticus	yes	1109740	yes	no		no
GCA_900188355.1	Lutibacter flavus	d__Bacteria; p__Bacteroidetes; c__Flavobacteriia; o__Flavobacteriales; f__Flavobacteriaceae; g__Lutibacter; s__Lutibacter flavus	d__Bacteria; p__Bacteroidota; c__Bacteroidia; o__Flavobacteriales; f__Flavobacteriaceae; g__Lutibacter; s__Lutibacter flavus	yes	691689	yes	no		no
GCA_004378585.1	Gramella jeungdoensis	d__Bacteria; p__Bacteroidetes; c__Flavobacteriia; o__Flavobacteriales; f__Flavobacteriaceae; g__Gramella; s__Gramella jeungdoensis	d__Bacteria; p__Bacteroidota; c__Bacteroidia; o__Flavobacteriales; f__Flavobacteriaceae; g__Lutibacter; s__Lutibacter jeungdoensis	yes	708091	yes	no		no
GCA_900116115.1	Lutibacter maritimus	d__Bacteria; p__Bacteroidetes; c__Flavobacteriia; o__Flavobacteriales; f__Flavobacteriaceae; g__Lutibacter; s__Lutibacter maritimus	d__Bacteria; p__Bacteroidota; c__Bacteroidia; o__Flavobacteriales; f__Flavobacteriaceae; g__Lutibacter; s__Lutibacter maritimus	yes	593133	yes	no		no
GCA_003384935.1	Lutibacter oceani	d__Bacteria; p__Bacteroidetes; c__Flavobacteriia; o__Flavobacteriales; f__Flavobacteriaceae; g__Lutibacter; s__Lutibacter oceani	d__Bacteria; p__Bacteroidota; c__Bacteroidia; o__Flavobacteriales; f__Flavobacteriaceae; g__Lutibacter; s__Lutibacter oceani	yes	1853311	yes	no		no
GCA_900106565.1	Lutibacter oricola	d__Bacteria; p__Bacteroidetes; c__Flavobacteriia; o__Flavobacteriales; f__Flavobacteriaceae; g__Lutibacter; s__Lutibacter oricola	d__Bacteria; p__Bacteroidota; c__Bacteroidia; o__Flavobacteriales; f__Flavobacteriaceae; g__Lutibacter; s__Lutibacter oricola	yes	762486	yes	no		no
GCA_001543325.1	Lutibacter profundi	d__Bacteria; p__Bacteroidetes; c__Flavobacteriia; o__Flavobacteriales; f__Flavobacteriaceae; g__Lutibacter; s__Lutibacter profundi	d__Bacteria; p__Bacteroidota; c__Bacteroidia; o__Flavobacteriales; f__Flavobacteriaceae; g__Lutibacter; s__Lutibacter profundi	yes	1622118	yes	no		no
GCA_000733475.1	Mangrovimonas yunxiaonensis	d__Bacteria; p__Bacteroidetes; c__Flavobacteriia; o__Flavobacteriales; f__Flavobacteriaceae; g__Mangrovimonas; s__Mangrovimonas yunxiaonensis	d__Bacteria; p__Bacteroidota; c__Bacteroidia; o__Flavobacteriales; f__Flavobacteriaceae; g__Mangrovimonas; s__Mangrovimonas yunxiaonensis	yes	1197477	yes	yes	0.00035	yes
GCA_003148665.1	Maribacter polysiphoniae	d__Bacteria; p__Bacteroidetes; c__Flavobacteriia; o__Flavobacteriales; f__Flavobacteriaceae; g__Maribacter; s__Maribacter polysiphoniae	d__Bacteria; p__Bacteroidota; c__Bacteroidia; o__Flavobacteriales; f__Flavobacteriaceae; g__Maribacter_A; s__Maribacter_A polysiphoniae	no
GCA_000621125.1	Maribacter antarcticus DSM 21422	d__Bacteria; p__Bacteroidetes; c__Flavobacteriia; o__Flavobacteriales; f__Flavobacteriaceae; g__Maribacter; s__Maribacter antarcticus	d__Bacteria; p__Bacteroidota; c__Bacteroidia; o__Flavobacteriales; f__Flavobacteriaceae; g__Maribacter; s__Maribacter antarcticus	no
GCA_900142175.1	Maribacter aquivivus	d__Bacteria; p__Bacteroidetes; c__Flavobacteriia; o__Flavobacteriales; f__Flavobacteriaceae; g__Maribacter; s__Maribacter aquivivus	d__Bacteria; p__Bacteroidota; c__Bacteroidia; o__Flavobacteriales; f__Flavobacteriaceae; g__Maribacter; s__Maribacter aquivivus	yes	228958	yes	yes	0.083	yes
GCA_900167935.1	Maribacter arcticus	d__Bacteria; p__Bacteroidetes; c__Flavobacteriia; o__Flavobacteriales; f__Flavobacteriaceae; g__Maribacter; s__Maribacter arcticus	d__Bacteria; p__Bacteroidota; c__Bacteroidia; o__Flavobacteriales; f__Flavobacteriaceae; g__Maribacter; s__Maribacter arcticus	yes	561365	yes	yes	0.045	yes
GCA_005780245.1	Maripseudobacter aurantiacus	d__Bacteria; p__Bacteroidetes; c__Flavobacteriia; o__Flavobacteriales; f__Flavobacteriaceae; g__Maripseudobacter; s__Maripseudobacter aurantiacus	d__Bacteria; p__Bacteroidota; c__Bacteroidia; o__Flavobacteriales; f__Flavobacteriaceae; g__Maribacter; s__Maribacter aurantiacus	yes	1882343	yes	yes	0.031	yes
GCA_004364175.1	Maribacter caenipelagi	d__Bacteria; p__Bacteroidetes; c__Flavobacteriia; o__Flavobacteriales; f__Flavobacteriaceae; g__Maribacter; s__Maribacter caenipelagi	d__Bacteria; p__Bacteroidota; c__Bacteroidia; o__Flavobacteriales; f__Flavobacteriaceae; g__Maribacter; s__Maribacter caenipelagi	yes	1447781	yes	yes	0.042	yes
GCA_002269385.1	Maribacter cobaltidurans	d__Bacteria; p__Bacteroidetes; c__Flavobacteriia; o__Flavobacteriales; f__Flavobacteriaceae; g__Maribacter; s__Maribacter cobaltidurans	d__Bacteria; p__Bacteroidota; c__Bacteroidia; o__Flavobacteriales; f__Flavobacteriaceae; g__Maribacter; s__Maribacter cobaltidurans	yes	1178778	yes	yes	0.031	yes
GCA_001447995.1	Maribacter dokdonensis DSW-8	d__Bacteria; p__Bacteroidetes; c__Flavobacteriia; o__Flavobacteriales; f__Flavobacteriaceae; g__Maribacter; s__Maribacter dokdonensis	d__Bacteria; p__Bacteroidota; c__Bacteroidia; o__Flavobacteriales; f__Flavobacteriaceae; g__Maribacter; s__Maribacter dokdonensis	yes	1300346	yes	yes	0.035	yes
GCA_000744105.1	Maribacter forsetii DSM 18668	d__Bacteria; p__Bacteroidetes; c__Flavobacteriia; o__Flavobacteriales; f__Flavobacteriaceae; g__Maribacter; s__Maribacter forsetii	d__Bacteria; p__Bacteroidota; c__Bacteroidia; o__Flavobacteriales; f__Flavobacteriaceae; g__Maribacter; s__Maribacter forsetii	no
GCA_003075045.1	Maribacter litoralis	d__Bacteria; p__Bacteroidetes; c__Flavobacteriia; o__Flavobacteriales; f__Flavobacteriaceae; g__Maribacter; s__Maribacter litoralis	d__Bacteria; p__Bacteroidota; c__Bacteroidia; o__Flavobacteriales; f__Flavobacteriaceae; g__Maribacter; s__Maribacter litoralis	no
GCA_900109345.1	Maribacter orientalis	d__Bacteria; p__Bacteroidetes; c__Flavobacteriia; o__Flavobacteriales; f__Flavobacteriaceae; g__Maribacter; s__Maribacter orientalis	d__Bacteria; p__Bacteroidota; c__Bacteroidia; o__Flavobacteriales; f__Flavobacteriaceae; g__Maribacter; s__Maribacter orientalis	yes	228957	yes	yes	0.023	yes
GCA_900188415.1	Maribacter sedimenticola	d__Bacteria; p__Bacteroidetes; c__Flavobacteriia; o__Flavobacteriales; f__Flavobacteriaceae; g__Maribacter; s__Maribacter sedimenticola	d__Bacteria; p__Bacteroidota; c__Bacteroidia; o__Flavobacteriales; f__Flavobacteriaceae; g__Maribacter; s__Maribacter sedimenticola	yes	228956	yes	yes	0.019	yes
GCA_004364165.1	Maribacter spongiicola	d__Bacteria; p__Bacteroidetes; c__Flavobacteriia; o__Flavobacteriales; f__Flavobacteriaceae; g__Maribacter; s__Maribacter spongiicola	d__Bacteria; p__Bacteroidota; c__Bacteroidia; o__Flavobacteriales; f__Flavobacteriaceae; g__Maribacter; s__Maribacter spongiicola	yes	1206753	yes	yes	0.083	yes
GCA_900112245.1	Maribacter stanieri	d__Bacteria; p__Bacteroidetes; c__Flavobacteriia; o__Flavobacteriales; f__Flavobacteriaceae; g__Maribacter; s__Maribacter stanieri	d__Bacteria; p__Bacteroidota; c__Bacteroidia; o__Flavobacteriales; f__Flavobacteriaceae; g__Maribacter; s__Maribacter stanieri	yes	440514	yes	yes	0.089	yes
GCA_001020565.1	Maribacter thermophilus	d__Bacteria; p__Bacteroidetes; c__Flavobacteriia; o__Flavobacteriales; f__Flavobacteriaceae; g__Maribacter; s__Maribacter thermophilus	d__Bacteria; p__Bacteroidota; c__Bacteroidia; o__Flavobacteriales; f__Flavobacteriaceae; g__Maribacter; s__Maribacter thermophilus	no
GCA_900155985.1	Maribacter ulvicola	d__Bacteria; p__Bacteroidetes; c__Flavobacteriia; o__Flavobacteriales; f__Flavobacteriaceae; g__Maribacter; s__Maribacter ulvicola	d__Bacteria; p__Bacteroidota; c__Bacteroidia; o__Flavobacteriales; f__Flavobacteriaceae; g__Maribacter; s__Maribacter ulvicola	yes	228959	yes	yes	0.066	yes
GCA_003634105.1	Maribacter vaceletii	d__Bacteria; p__Bacteroidetes; c__Flavobacteriia; o__Flavobacteriales; f__Flavobacteriaceae; g__Maribacter; s__Maribacter vaceletii	d__Bacteria; p__Bacteroidota; c__Bacteroidia; o__Flavobacteriales; f__Flavobacteriaceae; g__Maribacter; s__Maribacter vaceletii	yes	1206816	yes	yes	0.0082	yes
GCA_004341235.1	Mariniflexile fucanivorans	d__Bacteria; p__Bacteroidetes; c__Flavobacteriia; o__Flavobacteriales; f__Flavobacteriaceae; g__Mariniflexile; s__Mariniflexile fucanivorans	d__Bacteria; p__Bacteroidota; c__Bacteroidia; o__Flavobacteriales; f__Flavobacteriaceae; g__Mariniflexile; s__Mariniflexile fucanivorans	yes	264023	yes	yes	0.0002	yes
GCA_003353425.1	Marinirhabdus gelatinilytica	d__Bacteria; p__Bacteroidetes; c__Flavobacteriia; o__Flavobacteriales; f__Flavobacteriaceae; g__Marinirhabdus; s__Marinirhabdus gelatinilytica	d__Bacteria; p__Bacteroidota; c__Bacteroidia; o__Flavobacteriales; f__Flavobacteriaceae; g__Marinirhabdus; s__Marinirhabdus gelatinilytica	yes	1703343	yes	yes	0.00013	yes
GCA_003413745.1	Marixanthomonas ophiurae	d__Bacteria; p__Bacteroidetes; c__Flavobacteriia; o__Flavobacteriales; f__Flavobacteriaceae; g__Marixanthomonas; s__Marixanthomonas ophiurae	d__Bacteria; p__Bacteroidota; c__Bacteroidia; o__Flavobacteriales; f__Flavobacteriaceae; g__Marixanthomonas; s__Marixanthomonas ophiurae	yes	387659	yes	yes	0.00015	yes
GCA_000422365.1	Mesoflavibacter zeaxanthinifaciens DSM 18436	d__Bacteria; p__Bacteroidetes; c__Flavobacteriia; o__Flavobacteriales; f__Flavobacteriaceae; g__Mesoflavibacter; s__Mesoflavibacter zeaxanthinifaciens	d__Bacteria; p__Bacteroidota; c__Bacteroidia; o__Flavobacteriales; f__Flavobacteriaceae; g__Mesoflavibacter; s__Mesoflavibacter zeaxanthinifaciens	no
GCA_003253545.1	Mesonia algae	d__Bacteria; p__Bacteroidetes; c__Flavobacteriia; o__Flavobacteriales; f__Flavobacteriaceae; g__Mesonia; s__Mesonia algae	d__Bacteria; p__Bacteroidota; c__Bacteroidia; o__Flavobacteriales; f__Flavobacteriaceae; g__Mesonia; s__Mesonia algae	yes	213248	yes	yes	0.0018	yes
GCA_000423405.1	Mesonia mobilis DSM 19841	d__Bacteria; p__Bacteroidetes; c__Flavobacteriia; o__Flavobacteriales; f__Flavobacteriaceae; g__Mesonia; s__Mesonia mobilis	d__Bacteria; p__Bacteroidota; c__Bacteroidia; o__Flavobacteriales; f__Flavobacteriaceae; g__Mesonia; s__Mesonia mobilis	no
GCA_900141885.1	Mesonia phycicola	d__Bacteria; p__Bacteroidetes; c__Flavobacteriia; o__Flavobacteriales; f__Flavobacteriaceae; g__Mesonia; s__Mesonia phycicola	d__Bacteria; p__Bacteroidota; c__Bacteroidia; o__Flavobacteriales; f__Flavobacteriaceae; g__Mesonia; s__Mesonia phycicola	yes	579105	yes	yes	0.0071	yes
GCA_000963865.1	Muricauda lutaonensis	d__Bacteria; p__Bacteroidetes; c__Flavobacteriia; o__Flavobacteriales; f__Flavobacteriaceae; g__Muricauda; s__Muricauda lutaonensis	d__Bacteria; p__Bacteroidota; c__Bacteroidia; o__Flavobacteriales; f__Flavobacteriaceae; g__Muricauda_A; s__Muricauda_A lutaonensis	yes	516051	yes	yes	0.0043	yes
GCA_003992675.1	Muricauda aquimarina	d__Bacteria; p__Bacteroidetes; c__Flavobacteriia; o__Flavobacteriales; f__Flavobacteriaceae; g__Muricauda; s__Muricauda aquimarina	d__Bacteria; p__Bacteroidota; c__Bacteroidia; o__Flavobacteriales; f__Flavobacteriaceae; g__Muricauda; s__Muricauda aquimarina	no
GCA_003992615.1	Muricauda beolgyonensis	d__Bacteria; p__Bacteroidetes; c__Flavobacteriia; o__Flavobacteriales; f__Flavobacteriaceae; g__Muricauda; s__Muricauda beolgyonensis	d__Bacteria; p__Bacteroidota; c__Bacteroidia; o__Flavobacteriales; f__Flavobacteriaceae; g__Muricauda; s__Muricauda beolgyonensis	no
GCA_001413955.1	Flagellimonas eckloniae	d__Bacteria; p__Bacteroidetes; c__Flavobacteriia; o__Flavobacteriales; f__Flavobacteriaceae; g__Flagellimonas; s__Flagellimonas eckloniae	d__Bacteria; p__Bacteroidota; c__Bacteroidia; o__Flavobacteriales; f__Flavobacteriaceae; g__Muricauda; s__Muricauda eckloniae	yes	346185	yes	yes	0.0043	yes
GCA_900129665.1	Flagellimonas flava	d__Bacteria; p__Bacteroidetes; c__Flavobacteriia; o__Flavobacteriales; f__Flavobacteriaceae; g__Flagellimonas; s__Flagellimonas flava	d__Bacteria; p__Bacteroidota; c__Bacteroidia; o__Flavobacteriales; f__Flavobacteriaceae; g__Muricauda; s__Muricauda flava	yes	570519	yes	yes	0.003	yes
GCA_003149745.1	Flagellimonas aquimarina	d__Bacteria; p__Bacteroidetes; c__Flavobacteriia; o__Flavobacteriales; f__Flavobacteriaceae; g__Flagellimonas; s__Flagellimonas aquimarina	d__Bacteria; p__Bacteroidota; c__Bacteroidia; o__Flavobacteriales; f__Flavobacteriaceae; g__Muricauda; s__Muricauda koreensis	yes	2201895	yes	yes	0.0043	yes
GCA_003581615.1	Muricauda lutimaris	d__Bacteria; p__Bacteroidetes; c__Flavobacteriia; o__Flavobacteriales; f__Flavobacteriaceae; g__Muricauda; s__Muricauda lutimaris	d__Bacteria; p__Bacteroidota; c__Bacteroidia; o__Flavobacteriales; f__Flavobacteriaceae; g__Muricauda; s__Muricauda lutimaris	yes	475082	yes	yes	0.0022	yes
GCA_900215465.1	Flagellimonas pacifica	d__Bacteria; p__Bacteroidetes; c__Flavobacteriia; o__Flavobacteriales; f__Flavobacteriaceae; g__Flagellimonas; s__Flagellimonas pacifica	d__Bacteria; p__Bacteroidota; c__Bacteroidia; o__Flavobacteriales; f__Flavobacteriaceae; g__Muricauda; s__Muricauda pacifica_A	yes	1247520	yes	yes	0.011	yes
GCA_003001695.1	Muricauda pacifica	d__Bacteria; p__Bacteroidetes; c__Flavobacteriia; o__Flavobacteriales; f__Flavobacteriaceae; g__Muricauda; s__Muricauda pacifica	d__Bacteria; p__Bacteroidota; c__Bacteroidia; o__Flavobacteriales; f__Flavobacteriaceae; g__Muricauda; s__Muricauda pacifica	yes	1080225	yes	yes	0.0036	yes
GCA_000224085.1	Muricauda ruestringensis DSM 13258	d__Bacteria; p__Bacteroidetes; c__Flavobacteriia; o__Flavobacteriales; f__Flavobacteriaceae; g__Muricauda; s__Muricauda ruestringensis	d__Bacteria; p__Bacteroidota; c__Bacteroidia; o__Flavobacteriales; f__Flavobacteriaceae; g__Muricauda; s__Muricauda ruestringensis	yes	886377	yes	yes	0.0043	yes
GCA_003584105.1	Muricauda taeanensis	d__Bacteria; p__Bacteroidetes; c__Flavobacteriia; o__Flavobacteriales; f__Flavobacteriaceae; g__Muricauda; s__Muricauda taeanensis	d__Bacteria; p__Bacteroidota; c__Bacteroidia; o__Flavobacteriales; f__Flavobacteriaceae; g__Muricauda; s__Muricauda taeanensis	yes	1005926	yes	yes	0.0037	yes
GCA_900102925.1	Muricauda zhangzhouensis	d__Bacteria; p__Bacteroidetes; c__Flavobacteriia; o__Flavobacteriales; f__Flavobacteriaceae; g__Muricauda; s__Muricauda zhangzhouensis	d__Bacteria; p__Bacteroidota; c__Bacteroidia; o__Flavobacteriales; f__Flavobacteriaceae; g__Muricauda; s__Muricauda zhangzhouensis	yes	1073328	yes	yes	0.0043	yes
GCA_900114085.1	Myroides guanonis	d__Bacteria; p__Bacteroidetes; c__Flavobacteriia; o__Flavobacteriales; f__Flavobacteriaceae; g__Myroides; s__Myroides guanonis	d__Bacteria; p__Bacteroidota; c__Bacteroidia; o__Flavobacteriales; f__Flavobacteriaceae; g__Myroides; s__Myroides guanonis	yes	1150112	yes	yes	0.0004	yes
GCA_004364575.1	Myroides indicus	d__Bacteria; p__Bacteroidetes; c__Flavobacteriia; o__Flavobacteriales; f__Flavobacteriaceae; g__Myroides; s__Myroides indicus	d__Bacteria; p__Bacteroidota; c__Bacteroidia; o__Flavobacteriales; f__Flavobacteriaceae; g__Myroides; s__Myroides indicus	yes	1323422	yes	yes	0.013	yes
GCA_000246945.1	Myroides injenensis M09-0166	d__Bacteria; p__Bacteroidetes; c__Flavobacteriia; o__Flavobacteriales; f__Flavobacteriaceae; g__Myroides; s__Myroides injenensis	d__Bacteria; p__Bacteroidota; c__Bacteroidia; o__Flavobacteriales; f__Flavobacteriaceae; g__Myroides; s__Myroides injenensis	no
GCA_900108395.1	Flavobacterium marinum	d__Bacteria; p__Bacteroidetes; c__Flavobacteriia; o__Flavobacteriales; f__Flavobacteriaceae; g__Flavobacterium; s__Flavobacterium marinum	d__Bacteria; p__Bacteroidota; c__Bacteroidia; o__Flavobacteriales; f__Flavobacteriaceae; g__Myroides; s__Myroides marinum	yes	1159016	yes	yes	0.0003	yes
GCA_900109075.1	Myroides marinus	d__Bacteria; p__Bacteroidetes; c__Flavobacteriia; o__Flavobacteriales; f__Flavobacteriaceae; g__Myroides; s__Myroides marinus	d__Bacteria; p__Bacteroidota; c__Bacteroidia; o__Flavobacteriales; f__Flavobacteriaceae; g__Myroides; s__Myroides marinus	yes	703342	yes	yes	0.012	yes
GCA_001485415.1	Myroides odoratimimus	d__Bacteria; p__Bacteroidetes; c__Flavobacteriia; o__Flavobacteriales; f__Flavobacteriaceae; g__Myroides; s__Myroides odoratimimus	d__Bacteria; p__Bacteroidota; c__Bacteroidia; o__Flavobacteriales; f__Flavobacteriaceae; g__Myroides; s__Myroides odoratimimus	yes	76832	yes	yes	0.012	yes
GCA_000243275.1	Myroides odoratus DSM 2801	d__Bacteria; p__Bacteroidetes; c__Flavobacteriia; o__Flavobacteriales; f__Flavobacteriaceae; g__Myroides; s__Myroides odoratus	d__Bacteria; p__Bacteroidota; c__Bacteroidia; o__Flavobacteriales; f__Flavobacteriaceae; g__Myroides; s__Myroides odoratus	yes	929704	yes	yes	0.012	yes
GCA_900099675.1	Myroides phaeus	d__Bacteria; p__Bacteroidetes; c__Flavobacteriia; o__Flavobacteriales; f__Flavobacteriaceae; g__Myroides; s__Myroides phaeus	d__Bacteria; p__Bacteroidota; c__Bacteroidia; o__Flavobacteriales; f__Flavobacteriaceae; g__Myroides; s__Myroides phaeus	yes	702745	yes	yes	0.012	yes
GCA_000833025.1	Myroides profundi	d__Bacteria; p__Bacteroidetes; c__Flavobacteriia; o__Flavobacteriales; f__Flavobacteriaceae; g__Myroides; s__Myroides profundi	d__Bacteria; p__Bacteroidota; c__Bacteroidia; o__Flavobacteriales; f__Flavobacteriaceae; g__Myroides; s__Myroides profundi	yes	480520	yes	yes	0.012	yes
GCA_900115115.1	Flavobacterium ummariense	d__Bacteria; p__Bacteroidetes; c__Flavobacteriia; o__Flavobacteriales; f__Flavobacteriaceae; g__Flavobacterium; s__Flavobacterium ummariense	d__Bacteria; p__Bacteroidota; c__Bacteroidia; o__Flavobacteriales; f__Flavobacteriaceae; g__Myroides; s__Myroides ummariense	yes	913024	yes	yes	0.0036	yes
GCA_002994045.1	Nonlabens agnitus	d__Bacteria; p__Bacteroidetes; c__Flavobacteriia; o__Flavobacteriales; f__Flavobacteriaceae; g__Nonlabens; s__Nonlabens agnitus	d__Bacteria; p__Bacteroidota; c__Bacteroidia; o__Flavobacteriales; f__Flavobacteriaceae; g__Nonlabens; s__Nonlabens agnitus	yes	870484	yes	no		no
GCA_002954765.1	Nonlabens arenilitoris	d__Bacteria; p__Bacteroidetes; c__Flavobacteriia; o__Flavobacteriales; f__Flavobacteriaceae; g__Nonlabens; s__Nonlabens arenilitoris	d__Bacteria; p__Bacteroidota; c__Bacteroidia; o__Flavobacteriales; f__Flavobacteriaceae; g__Nonlabens; s__Nonlabens arenilitoris	yes	1217969	yes	no		no
GCA_000332115.1	Nonlabens dokdonensis DSW-6	d__Bacteria; p__Bacteroidetes; c__Flavobacteriia; o__Flavobacteriales; f__Flavobacteriaceae; g__Nonlabens; s__Nonlabens dokdonensis	d__Bacteria; p__Bacteroidota; c__Bacteroidia; o__Flavobacteriales; f__Flavobacteriaceae; g__Nonlabens; s__Nonlabens dokdonensis	yes	592029	yes	no		no
GCA_000831385.1	Nonlabens marinus S1-08	d__Bacteria; p__Bacteroidetes; c__Flavobacteriia; o__Flavobacteriales; f__Flavobacteriaceae; g__Nonlabens; s__Nonlabens marinus	d__Bacteria; p__Bacteroidota; c__Bacteroidia; o__Flavobacteriales; f__Flavobacteriaceae; g__Nonlabens; s__Nonlabens marinus	yes	1454201	yes	no		no
GCA_002117125.1	Nonlabens spongiae	d__Bacteria; p__Bacteroidetes; c__Flavobacteriia; o__Flavobacteriales; f__Flavobacteriaceae; g__Nonlabens; s__Nonlabens spongiae	d__Bacteria; p__Bacteroidota; c__Bacteroidia; o__Flavobacteriales; f__Flavobacteriaceae; g__Nonlabens; s__Nonlabens spongiae	yes	331648	yes	no		no
GCA_002954355.1	Nonlabens tegetincola	d__Bacteria; p__Bacteroidetes; c__Flavobacteriia; o__Flavobacteriales; f__Flavobacteriaceae; g__Nonlabens; s__Nonlabens tegetincola	d__Bacteria; p__Bacteroidota; c__Bacteroidia; o__Flavobacteriales; f__Flavobacteriaceae; g__Nonlabens; s__Nonlabens tegetincola	yes	323273	yes	no		no
GCA_000732625.1	Nonlabens ulvanivorans	d__Bacteria; p__Bacteroidetes; c__Flavobacteriia; o__Flavobacteriales; f__Flavobacteriaceae; g__Nonlabens; s__Nonlabens ulvanivorans	d__Bacteria; p__Bacteroidota; c__Bacteroidia; o__Flavobacteriales; f__Flavobacteriaceae; g__Nonlabens; s__Nonlabens ulvanivorans	yes	906888	yes	no		no
GCA_002934445.1	Nonlabens xylanidelens	d__Bacteria; p__Bacteroidetes; c__Flavobacteriia; o__Flavobacteriales; f__Flavobacteriaceae; g__Nonlabens; s__Nonlabens xylanidelens	d__Bacteria; p__Bacteroidota; c__Bacteroidia; o__Flavobacteriales; f__Flavobacteriaceae; g__Nonlabens; s__Nonlabens xylanidelens	yes	191564	yes	no		no
GCA_001418105.1	Lacinutrix himadriensis	d__Bacteria; p__Bacteroidetes; c__Flavobacteriia; o__Flavobacteriales; f__Flavobacteriaceae; g__Lacinutrix; s__Lacinutrix himadriensis	d__Bacteria; p__Bacteroidota; c__Bacteroidia; o__Flavobacteriales; f__Flavobacteriaceae; g__Oceanihabitans; s__Oceanihabitans himadriensis	no
GCA_003337215.1	Oceanihabitans sediminis	d__Bacteria; p__Bacteroidetes; c__Flavobacteriia; o__Flavobacteriales; f__Flavobacteriaceae; g__Oceanihabitans; s__Oceanihabitans sediminis	d__Bacteria; p__Bacteroidota; c__Bacteroidia; o__Flavobacteriales; f__Flavobacteriaceae; g__Oceanihabitans; s__Oceanihabitans sediminis	yes	1812012	yes	yes	5.2e-05	yes
GCA_000220525.1	Ochrovirga pacifica	d__Bacteria; p__Bacteroidetes; c__Flavobacteriia; o__Flavobacteriales; f__Flavobacteriaceae; g__Ochrovirga; s__Ochrovirga pacifica	d__Bacteria; p__Bacteroidota; c__Bacteroidia; o__Flavobacteriales; f__Flavobacteriaceae; g__Ochrovirga; s__Ochrovirga pacifica	no
GCA_003259525.1	Olleya aquimaris	d__Bacteria; p__Bacteroidetes; c__Flavobacteriia; o__Flavobacteriales; f__Flavobacteriaceae; g__Olleya; s__Olleya aquimaris	d__Bacteria; p__Bacteroidota; c__Bacteroidia; o__Flavobacteriales; f__Flavobacteriaceae; g__Olleya; s__Olleya aquimaris	yes	639310	yes	yes	0.00085	yes
GCA_000518485.1	Olleya marilimosa CAM030	d__Bacteria; p__Bacteroidetes; c__Flavobacteriia; o__Flavobacteriales; f__Flavobacteriaceae; g__Olleya; s__Olleya marilimosa	d__Bacteria; p__Bacteroidota; c__Bacteroidia; o__Flavobacteriales; f__Flavobacteriaceae; g__Olleya; s__Olleya marilimosa	no
GCA_900114005.1	Olleya namhaensis	d__Bacteria; p__Bacteroidetes; c__Flavobacteriia; o__Flavobacteriales; f__Flavobacteriaceae; g__Olleya; s__Olleya namhaensis	d__Bacteria; p__Bacteroidota; c__Bacteroidia; o__Flavobacteriales; f__Flavobacteriaceae; g__Olleya; s__Olleya namhaensis	yes	1144750	yes	yes	0.00011	yes
GCA_001640115.1	Polaribacter atrinae	d__Bacteria; p__Bacteroidetes; c__Flavobacteriia; o__Flavobacteriales; f__Flavobacteriaceae; g__Polaribacter; s__Polaribacter atrinae	d__Bacteria; p__Bacteroidota; c__Bacteroidia; o__Flavobacteriales; f__Flavobacteriaceae; g__Polaribacter; s__Polaribacter atrinae	yes	1333662	yes	no		no
GCA_002954605.1	Polaribacter butkevichii	d__Bacteria; p__Bacteroidetes; c__Flavobacteriia; o__Flavobacteriales; f__Flavobacteriaceae; g__Polaribacter; s__Polaribacter butkevichii	d__Bacteria; p__Bacteroidota; c__Bacteroidia; o__Flavobacteriales; f__Flavobacteriaceae; g__Polaribacter; s__Polaribacter butkevichii	yes	218490	yes	no		no
GCA_001280865.1	Polaribacter dokdonensis DSW-5	d__Bacteria; p__Bacteroidetes; c__Flavobacteriia; o__Flavobacteriales; f__Flavobacteriaceae; g__Polaribacter; s__Polaribacter dokdonensis	d__Bacteria; p__Bacteroidota; c__Bacteroidia; o__Flavobacteriales; f__Flavobacteriaceae; g__Polaribacter; s__Polaribacter dokdonensis	yes	1300348	yes	no		no
GCA_002943715.1	Polaribacter filamentus	d__Bacteria; p__Bacteroidetes; c__Flavobacteriia; o__Flavobacteriales; f__Flavobacteriaceae; g__Polaribacter; s__Polaribacter filamentus	d__Bacteria; p__Bacteroidota; c__Bacteroidia; o__Flavobacteriales; f__Flavobacteriaceae; g__Polaribacter; s__Polaribacter filamentus	yes	53483	yes	no		no
GCA_002954645.1	Polaribacter gangjinensis	d__Bacteria; p__Bacteroidetes; c__Flavobacteriia; o__Flavobacteriales; f__Flavobacteriaceae; g__Polaribacter; s__Polaribacter gangjinensis	d__Bacteria; p__Bacteroidota; c__Bacteroidia; o__Flavobacteriales; f__Flavobacteriaceae; g__Polaribacter; s__Polaribacter gangjinensis	yes	574710	yes	no		no
GCA_002954665.1	Polaribacter glomeratus	d__Bacteria; p__Bacteroidetes; c__Flavobacteriia; o__Flavobacteriales; f__Flavobacteriaceae; g__Polaribacter; s__Polaribacter glomeratus	d__Bacteria; p__Bacteroidota; c__Bacteroidia; o__Flavobacteriales; f__Flavobacteriaceae; g__Polaribacter; s__Polaribacter glomeratus	yes	102	yes	no		no
GCA_002201315.1	Polaribacter haliotis	d__Bacteria; p__Bacteroidetes; c__Flavobacteriia; o__Flavobacteriales; f__Flavobacteriaceae; g__Polaribacter; s__Polaribacter haliotis	d__Bacteria; p__Bacteroidota; c__Bacteroidia; o__Flavobacteriales; f__Flavobacteriaceae; g__Polaribacter; s__Polaribacter haliotis	no
GCA_000153225.1	Polaribacter irgensii 23-P	d__Bacteria; p__Bacteroidetes; c__Flavobacteriia; o__Flavobacteriales; f__Flavobacteriaceae; g__Polaribacter; s__Polaribacter irgensii	d__Bacteria; p__Bacteroidota; c__Bacteroidia; o__Flavobacteriales; f__Flavobacteriaceae; g__Polaribacter; s__Polaribacter irgensii	yes	313594	yes	no		no
GCA_002954685.1	Polaribacter porphyrae	d__Bacteria; p__Bacteroidetes; c__Flavobacteriia; o__Flavobacteriales; f__Flavobacteriaceae; g__Polaribacter; s__Polaribacter porphyrae	d__Bacteria; p__Bacteroidota; c__Bacteroidia; o__Flavobacteriales; f__Flavobacteriaceae; g__Polaribacter; s__Polaribacter porphyrae	yes	1137780	yes	no		no
GCA_001975665.1	Polaribacter reichenbachii	d__Bacteria; p__Bacteroidetes; c__Flavobacteriia; o__Flavobacteriales; f__Flavobacteriaceae; g__Polaribacter; s__Polaribacter reichenbachii	d__Bacteria; p__Bacteroidota; c__Bacteroidia; o__Flavobacteriales; f__Flavobacteriaceae; g__Polaribacter; s__Polaribacter reichenbachii	yes	996801	yes	no		no
GCA_002814075.1	Polaribacter sejongensis	d__Bacteria; p__Bacteroidetes; c__Flavobacteriia; o__Flavobacteriales; f__Flavobacteriaceae; g__Polaribacter; s__Polaribacter sejongensis	d__Bacteria; p__Bacteroidota; c__Bacteroidia; o__Flavobacteriales; f__Flavobacteriaceae; g__Polaribacter; s__Polaribacter sejongensis	yes	985043	yes	no		no
GCA_002201235.1	Polaribacter tangerinus	d__Bacteria; p__Bacteroidetes; c__Flavobacteriia; o__Flavobacteriales; f__Flavobacteriaceae; g__Polaribacter; s__Polaribacter tangerinus	d__Bacteria; p__Bacteroidota; c__Bacteroidia; o__Flavobacteriales; f__Flavobacteriaceae; g__Polaribacter; s__Polaribacter tangerinus	no
GCA_001761365.1	Polaribacter vadi	d__Bacteria; p__Bacteroidetes; c__Flavobacteriia; o__Flavobacteriales; f__Flavobacteriaceae; g__Polaribacter; s__Polaribacter vadi	d__Bacteria; p__Bacteroidota; c__Bacteroidia; o__Flavobacteriales; f__Flavobacteriaceae; g__Polaribacter; s__Polaribacter vadi	yes	1774273	yes	no		no
GCA_900101815.1	Pricia antarctica	d__Bacteria; p__Bacteroidetes; c__Flavobacteriia; o__Flavobacteriales; f__Flavobacteriaceae; g__Pricia; s__Pricia antarctica	d__Bacteria; p__Bacteroidota; c__Bacteroidia; o__Flavobacteriales; f__Flavobacteriaceae; g__Pricia; s__Pricia antarctica	yes	641691	yes	yes	0.002	yes
GCA_900141855.1	Pseudozobellia thermophila	d__Bacteria; p__Bacteroidetes; c__Flavobacteriia; o__Flavobacteriales; f__Flavobacteriaceae; g__Pseudozobellia; s__Pseudozobellia thermophila	d__Bacteria; p__Bacteroidota; c__Bacteroidia; o__Flavobacteriales; f__Flavobacteriaceae; g__Pseudozobellia; s__Pseudozobellia thermophila	yes	192903	yes	yes	0.0038	yes
GCA_000355905.1	Psychroflexus gondwanensis ACAM 44	d__Bacteria; p__Bacteroidetes; c__Flavobacteriia; o__Flavobacteriales; f__Flavobacteriaceae; g__Psychroflexus; s__Psychroflexus gondwanensis	d__Bacteria; p__Bacteroidota; c__Bacteroidia; o__Flavobacteriales; f__Flavobacteriaceae; g__Psychroflexus; s__Psychroflexus gondwanensis	yes	1189619	yes	yes	0.025	yes
GCA_900107595.1	Psychroflexus halocasei	d__Bacteria; p__Bacteroidetes; c__Flavobacteriia; o__Flavobacteriales; f__Flavobacteriaceae; g__Psychroflexus; s__Psychroflexus halocasei	d__Bacteria; p__Bacteroidota; c__Bacteroidia; o__Flavobacteriales; f__Flavobacteriaceae; g__Psychroflexus; s__Psychroflexus halocasei	yes	908615	yes	yes	0.0007	yes
GCA_900129035.1	Psychroflexus salarius	d__Bacteria; p__Bacteroidetes; c__Flavobacteriia; o__Flavobacteriales; f__Flavobacteriaceae; g__Psychroflexus; s__Psychroflexus salarius	d__Bacteria; p__Bacteroidota; c__Bacteroidia; o__Flavobacteriales; f__Flavobacteriaceae; g__Psychroflexus; s__Psychroflexus salarius	yes	1155689	yes	yes	0.0037	yes
GCA_900099815.1	Psychroflexus sediminis	d__Bacteria; p__Bacteroidetes; c__Flavobacteriia; o__Flavobacteriales; f__Flavobacteriaceae; g__Psychroflexus; s__Psychroflexus sediminis	d__Bacteria; p__Bacteroidota; c__Bacteroidia; o__Flavobacteriales; f__Flavobacteriaceae; g__Psychroflexus; s__Psychroflexus sediminis	yes	470826	yes	yes	0.015	yes
GCA_000153485.2	Psychroflexus torquis ATCC 700755	d__Bacteria; p__Bacteroidetes; c__Flavobacteriia; o__Flavobacteriales; f__Flavobacteriaceae; g__Psychroflexus; s__Psychroflexus torquis	d__Bacteria; p__Bacteroidota; c__Bacteroidia; o__Flavobacteriales; f__Flavobacteriaceae; g__Psychroflexus; s__Psychroflexus torquis	yes	313595	yes	yes	0.047	yes
GCA_000378765.1	Psychroflexus tropicus DSM 15496	d__Bacteria; p__Bacteroidetes; c__Flavobacteriia; o__Flavobacteriales; f__Flavobacteriaceae; g__Psychroflexus; s__Psychroflexus tropicus	d__Bacteria; p__Bacteroidota; c__Bacteroidia; o__Flavobacteriales; f__Flavobacteriaceae; g__Psychroflexus; s__Psychroflexus tropicus	no
GCA_000425305.1	Psychroserpens burtonensis DSM 12212	d__Bacteria; p__Bacteroidetes; c__Flavobacteriia; o__Flavobacteriales; f__Flavobacteriaceae; g__Psychroserpens; s__Psychroserpens burtonensis	d__Bacteria; p__Bacteroidota; c__Bacteroidia; o__Flavobacteriales; f__Flavobacteriaceae; g__Psychroserpens; s__Psychroserpens burtonensis	no
GCA_000826655.1	Psychroserpens damuponensis	d__Bacteria; p__Bacteroidetes; c__Flavobacteriia; o__Flavobacteriales; f__Flavobacteriaceae; g__Psychroserpens; s__Psychroserpens damuponensis	d__Bacteria; p__Bacteroidota; c__Bacteroidia; o__Flavobacteriales; f__Flavobacteriaceae; g__Psychroserpens; s__Psychroserpens damuponensis	no
GCA_000797465.1	Psychroserpens jangbogonensis	d__Bacteria; p__Bacteroidetes; c__Flavobacteriia; o__Flavobacteriales; f__Flavobacteriaceae; g__Psychroserpens; s__Psychroserpens jangbogonensis	d__Bacteria; p__Bacteroidota; c__Bacteroidia; o__Flavobacteriales; f__Flavobacteriaceae; g__Psychroserpens; s__Psychroserpens jangbogonensis	no
GCA_000826645.1	Psychroserpens mesophilus	d__Bacteria; p__Bacteroidetes; c__Flavobacteriia; o__Flavobacteriales; f__Flavobacteriaceae; g__Psychroserpens; s__Psychroserpens mesophilus	d__Bacteria; p__Bacteroidota; c__Bacteroidia; o__Flavobacteriales; f__Flavobacteriaceae; g__Psychroserpens; s__Psychroserpens mesophilus	no
GCA_900116665.1	Pustulibacterium marinum	d__Bacteria; p__Bacteroidetes; c__Flavobacteriia; o__Flavobacteriales; f__Flavobacteriaceae; g__Pustulibacterium; s__Pustulibacterium marinum	d__Bacteria; p__Bacteroidota; c__Bacteroidia; o__Flavobacteriales; f__Flavobacteriaceae; g__Pustulibacterium; s__Pustulibacterium marinum	yes	1224947	yes	yes	0.00014	yes
GCA_004799345.1	Robertkochia marina	d__Bacteria; p__Bacteroidetes; c__Flavobacteriia; o__Flavobacteriales; f__Flavobacteriaceae; g__Robertkochia; s__Robertkochia marina	d__Bacteria; p__Bacteroidota; c__Bacteroidia; o__Flavobacteriales; f__Flavobacteriaceae; g__Robertkochia; s__Robertkochia marina	yes	1227945	yes	no		no
GCA_000024125.1	Robiginitalea biformata HTCC2501	d__Bacteria; p__Bacteroidetes; c__Flavobacteriia; o__Flavobacteriales; f__Flavobacteriaceae; g__Robiginitalea; s__Robiginitalea biformata	d__Bacteria; p__Bacteroidota; c__Bacteroidia; o__Flavobacteriales; f__Flavobacteriaceae; g__Robiginitalea; s__Robiginitalea biformata	yes	313596	yes	yes	0.001	yes
GCA_900115205.1	Robiginitalea myxolifaciens	d__Bacteria; p__Bacteroidetes; c__Flavobacteriia; o__Flavobacteriales; f__Flavobacteriaceae; g__Robiginitalea; s__Robiginitalea myxolifaciens	d__Bacteria; p__Bacteroidota; c__Bacteroidia; o__Flavobacteriales; f__Flavobacteriaceae; g__Robiginitalea; s__Robiginitalea myxolifaciens	yes	400055	yes	yes	0.0022	yes
GCA_900113135.1	Salegentibacter agarivorans	d__Bacteria; p__Bacteroidetes; c__Flavobacteriia; o__Flavobacteriales; f__Flavobacteriaceae; g__Salegentibacter; s__Salegentibacter agarivorans	d__Bacteria; p__Bacteroidota; c__Bacteroidia; o__Flavobacteriales; f__Flavobacteriaceae; g__Salegentibacter; s__Salegentibacter agarivorans	yes	345907	yes	yes	1.5e-06	yes
GCA_900129445.1	Salegentibacter echinorum	d__Bacteria; p__Bacteroidetes; c__Flavobacteriia; o__Flavobacteriales; f__Flavobacteriaceae; g__Salegentibacter; s__Salegentibacter echinorum	d__Bacteria; p__Bacteroidota; c__Bacteroidia; o__Flavobacteriales; f__Flavobacteriaceae; g__Salegentibacter; s__Salegentibacter echinorum	yes	1073325	yes	yes	2.7e-06	yes
GCA_900115145.1	Salegentibacter flavus	d__Bacteria; p__Bacteroidetes; c__Flavobacteriia; o__Flavobacteriales; f__Flavobacteriaceae; g__Salegentibacter; s__Salegentibacter flavus	d__Bacteria; p__Bacteroidota; c__Bacteroidia; o__Flavobacteriales; f__Flavobacteriaceae; g__Salegentibacter; s__Salegentibacter flavus	yes	287099	yes	yes	1.6e-05	yes
GCA_900168045.1	Salegentibacter holothuriorum	d__Bacteria; p__Bacteroidetes; c__Flavobacteriia; o__Flavobacteriales; f__Flavobacteriaceae; g__Salegentibacter; s__Salegentibacter holothuriorum	d__Bacteria; p__Bacteroidota; c__Bacteroidia; o__Flavobacteriales; f__Flavobacteriaceae; g__Salegentibacter; s__Salegentibacter holothuriorum	yes	241145	yes	yes	0.0012	yes
GCA_002900095.1	Salegentibacter mishustinae	d__Bacteria; p__Bacteroidetes; c__Flavobacteriia; o__Flavobacteriales; f__Flavobacteriaceae; g__Salegentibacter; s__Salegentibacter mishustinae	d__Bacteria; p__Bacteroidota; c__Bacteroidia; o__Flavobacteriales; f__Flavobacteriaceae; g__Salegentibacter; s__Salegentibacter mishustinae	yes	270918	yes	yes	2e-05	yes
GCA_900168265.1	Salegentibacter salarius	d__Bacteria; p__Bacteroidetes; c__Flavobacteriia; o__Flavobacteriales; f__Flavobacteriaceae; g__Salegentibacter; s__Salegentibacter salarius	d__Bacteria; p__Bacteroidota; c__Bacteroidia; o__Flavobacteriales; f__Flavobacteriaceae; g__Salegentibacter; s__Salegentibacter salarius	yes	435906	yes	yes	2e-05	yes
GCA_900142975.1	Salegentibacter salegens	d__Bacteria; p__Bacteroidetes; c__Flavobacteriia; o__Flavobacteriales; f__Flavobacteriaceae; g__Salegentibacter; s__Salegentibacter salegens	d__Bacteria; p__Bacteroidota; c__Bacteroidia; o__Flavobacteriales; f__Flavobacteriaceae; g__Salegentibacter; s__Salegentibacter salegens	yes	143223	yes	yes	1.5e-06	yes
GCA_900168115.1	Salegentibacter salinarum	d__Bacteria; p__Bacteroidetes; c__Flavobacteriia; o__Flavobacteriales; f__Flavobacteriaceae; g__Salegentibacter; s__Salegentibacter salinarum	d__Bacteria; p__Bacteroidota; c__Bacteroidia; o__Flavobacteriales; f__Flavobacteriaceae; g__Salegentibacter; s__Salegentibacter salinarum	yes	447422	yes	yes	1.5e-06	yes
GCA_002078605.1	Salegentibacter sediminis	d__Bacteria; p__Bacteroidetes; c__Flavobacteriia; o__Flavobacteriales; f__Flavobacteriaceae; g__Salegentibacter; s__Salegentibacter sediminis	d__Bacteria; p__Bacteroidota; c__Bacteroidia; o__Flavobacteriales; f__Flavobacteriaceae; g__Salegentibacter; s__Salegentibacter sediminis	no
GCA_900102915.1	Salinimicrobium catena	d__Bacteria; p__Bacteroidetes; c__Flavobacteriia; o__Flavobacteriales; f__Flavobacteriaceae; g__Salinimicrobium; s__Salinimicrobium catena	d__Bacteria; p__Bacteroidota; c__Bacteroidia; o__Flavobacteriales; f__Flavobacteriaceae; g__Salinimicrobium; s__Salinimicrobium catena	yes	390640	yes	yes	0.0018	yes
GCA_900215295.1	Salinimicrobium sediminis	d__Bacteria; p__Bacteroidetes; c__Flavobacteriia; o__Flavobacteriales; f__Flavobacteriaceae; g__Salinimicrobium; s__Salinimicrobium sediminis	d__Bacteria; p__Bacteroidota; c__Bacteroidia; o__Flavobacteriales; f__Flavobacteriaceae; g__Salinimicrobium; s__Salinimicrobium sediminis	yes	1343891	yes	yes	0.002	yes
GCA_000424665.1	Salinimicrobium terrae DSM 17865	d__Bacteria; p__Bacteroidetes; c__Flavobacteriia; o__Flavobacteriales; f__Flavobacteriaceae; g__Salinimicrobium; s__Salinimicrobium terrae	d__Bacteria; p__Bacteroidota; c__Bacteroidia; o__Flavobacteriales; f__Flavobacteriaceae; g__Salinimicrobium; s__Salinimicrobium terrae	no
GCA_000423585.1	Salinimicrobium xinjiangense DSM 19287	d__Bacteria; p__Bacteroidetes; c__Flavobacteriia; o__Flavobacteriales; f__Flavobacteriaceae; g__Salinimicrobium; s__Salinimicrobium xinjiangense	d__Bacteria; p__Bacteroidota; c__Bacteroidia; o__Flavobacteriales; f__Flavobacteriaceae; g__Salinimicrobium; s__Salinimicrobium xinjiangense	no
GCA_003386195.1	Seonamhaeicola aphaedonensis	d__Bacteria; p__Bacteroidetes; c__Flavobacteriia; o__Flavobacteriales; f__Flavobacteriaceae; g__Seonamhaeicola; s__Seonamhaeicola aphaedonensis	d__Bacteria; p__Bacteroidota; c__Bacteroidia; o__Flavobacteriales; f__Flavobacteriaceae; g__Seonamhaeicola; s__Seonamhaeicola aphaedonensis	yes	1461338	yes	yes	0.00035	yes
GCA_000941055.1	Siansivirga zeaxanthinifaciens CC-SAMT-1	d__Bacteria; p__Bacteroidetes; c__Flavobacteriia; o__Flavobacteriales; f__Flavobacteriaceae; g__Siansivirga; s__Siansivirga zeaxanthinifaciens	d__Bacteria; p__Bacteroidota; c__Bacteroidia; o__Flavobacteriales; f__Flavobacteriaceae; g__Siansivirga; s__Siansivirga zeaxanthinifaciens	yes	1454006	yes	yes	0.00026	yes
GCA_900119185.1	Sinomicrobium oceani	d__Bacteria; p__Bacteroidetes; c__Flavobacteriia; o__Flavobacteriales; f__Flavobacteriaceae; g__Sinomicrobium; s__Sinomicrobium oceani	d__Bacteria; p__Bacteroidota; c__Bacteroidia; o__Flavobacteriales; f__Flavobacteriaceae; g__Sinomicrobium; s__Sinomicrobium oceani	yes	1150368	yes	yes	0.0014	yes
GCA_003725735.1	Sinomicrobium pectinilyticum	d__Bacteria; p__Bacteroidetes; c__Flavobacteriia; o__Flavobacteriales; f__Flavobacteriaceae; g__Sinomicrobium; s__Sinomicrobium pectinilyticum	d__Bacteria; p__Bacteroidota; c__Bacteroidia; o__Flavobacteriales; f__Flavobacteriaceae; g__Sinomicrobium; s__Sinomicrobium pectinilyticum	yes	1084421	yes	yes	0.0014	yes
GCA_001642835.1	Tamlana agarivorans	d__Bacteria; p__Bacteroidetes; c__Flavobacteriia; o__Flavobacteriales; f__Flavobacteriaceae; g__Tamlana; s__Tamlana agarivorans	d__Bacteria; p__Bacteroidota; c__Bacteroidia; o__Flavobacteriales; f__Flavobacteriaceae; g__Tamlana_A; s__Tamlana_A agarivorans	no
GCA_000943555.1	Tamlana nanhaiensis	d__Bacteria; p__Bacteroidetes; c__Flavobacteriia; o__Flavobacteriales; f__Flavobacteriaceae; g__Tamlana; s__Tamlana nanhaiensis	d__Bacteria; p__Bacteroidota; c__Bacteroidia; o__Flavobacteriales; f__Flavobacteriaceae; g__Tamlana_B; s__Tamlana_B nanhaiensis	yes	1382798	yes	yes	0.00011	yes
GCA_000943565.1	Tamlana sedimentorum	d__Bacteria; p__Bacteroidetes; c__Flavobacteriia; o__Flavobacteriales; f__Flavobacteriaceae; g__Tamlana; s__Tamlana sedimentorum	d__Bacteria; p__Bacteroidota; c__Bacteroidia; o__Flavobacteriales; f__Flavobacteriaceae; g__Tamlana_B; s__Tamlana_B sedimentorum	yes	1435349	yes	yes	0.0012	yes
GCA_001889045.1	Tenacibaculum todarodis	d__Bacteria; p__Bacteroidetes; c__Flavobacteriia; o__Flavobacteriales; f__Flavobacteriaceae; g__Tenacibaculum; s__Tenacibaculum todarodis	d__Bacteria; p__Bacteroidota; c__Bacteroidia; o__Flavobacteriales; f__Flavobacteriaceae; g__Tenacibaculum_A; s__Tenacibaculum_A todarodis	yes	1850252	yes	no		no
GCA_001936575.1	Tenacibaculum agarivorans	d__Bacteria; p__Bacteroidetes; c__Flavobacteriia; o__Flavobacteriales; f__Flavobacteriaceae; g__Tenacibaculum; s__Tenacibaculum agarivorans	d__Bacteria; p__Bacteroidota; c__Bacteroidia; o__Flavobacteriales; f__Flavobacteriaceae; g__Tenacibaculum; s__Tenacibaculum agarivorans	no
GCA_004363005.1	Tenacibaculum caenipelagi	d__Bacteria; p__Bacteroidetes; c__Flavobacteriia; o__Flavobacteriales; f__Flavobacteriaceae; g__Tenacibaculum; s__Tenacibaculum caenipelagi	d__Bacteria; p__Bacteroidota; c__Bacteroidia; o__Flavobacteriales; f__Flavobacteriaceae; g__Tenacibaculum; s__Tenacibaculum caenipelagi	yes	1325435	yes	no		no
GCA_003664185.1	Tenacibaculum discolor	d__Bacteria; p__Bacteroidetes; c__Flavobacteriia; o__Flavobacteriales; f__Flavobacteriaceae; g__Tenacibaculum; s__Tenacibaculum discolor	d__Bacteria; p__Bacteroidota; c__Bacteroidia; o__Flavobacteriales; f__Flavobacteriaceae; g__Tenacibaculum; s__Tenacibaculum discolor	yes	361581	yes	no		no
GCA_003387615.1	Tenacibaculum gallaicum	d__Bacteria; p__Bacteroidetes; c__Flavobacteriia; o__Flavobacteriales; f__Flavobacteriaceae; g__Tenacibaculum; s__Tenacibaculum gallaicum	d__Bacteria; p__Bacteroidota; c__Bacteroidia; o__Flavobacteriales; f__Flavobacteriaceae; g__Tenacibaculum; s__Tenacibaculum gallaicum	yes	561505	yes	no		no
GCA_002120225.1	Tenacibaculum holothuriorum	d__Bacteria; p__Bacteroidetes; c__Flavobacteriia; o__Flavobacteriales; f__Flavobacteriaceae; g__Tenacibaculum; s__Tenacibaculum holothuriorum	d__Bacteria; p__Bacteroidota; c__Bacteroidia; o__Flavobacteriales; f__Flavobacteriaceae; g__Tenacibaculum; s__Tenacibaculum holothuriorum	yes	1635173	yes	no		no
GCA_900198195.1	Tenacibaculum jejuense	d__Bacteria; p__Bacteroidetes; c__Flavobacteriia; o__Flavobacteriales; f__Flavobacteriaceae; g__Tenacibaculum; s__Tenacibaculum jejuense	d__Bacteria; p__Bacteroidota; c__Bacteroidia; o__Flavobacteriales; f__Flavobacteriaceae; g__Tenacibaculum; s__Tenacibaculum jejuense	yes	584609	yes	no		no
GCA_003610735.1	Tenacibaculum lutimaris	d__Bacteria; p__Bacteroidetes; c__Flavobacteriia; o__Flavobacteriales; f__Flavobacteriaceae; g__Tenacibaculum; s__Tenacibaculum lutimaris	d__Bacteria; p__Bacteroidota; c__Bacteroidia; o__Flavobacteriales; f__Flavobacteriaceae; g__Tenacibaculum; s__Tenacibaculum lutimaris	yes	285258	yes	no		no
GCA_900119795.1	Tenacibaculum maritimum NCIMB 2154	d__Bacteria; p__Bacteroidetes; c__Flavobacteriia; o__Flavobacteriales; f__Flavobacteriaceae; g__Tenacibaculum; s__Tenacibaculum maritimum	d__Bacteria; p__Bacteroidota; c__Bacteroidia; o__Flavobacteriales; f__Flavobacteriaceae; g__Tenacibaculum; s__Tenacibaculum maritimum	yes	1349785	yes	no		no
GCA_003867075.1	Tenacibaculum mesophilum	d__Bacteria; p__Bacteroidetes; c__Flavobacteriia; o__Flavobacteriales; f__Flavobacteriaceae; g__Tenacibaculum; s__Tenacibaculum mesophilum	d__Bacteria; p__Bacteroidota; c__Bacteroidia; o__Flavobacteriales; f__Flavobacteriaceae; g__Tenacibaculum; s__Tenacibaculum mesophilum	yes	104268	yes	no		no
GCA_000430545.1	Tenacibaculum ovolyticum DSM 18103	d__Bacteria; p__Bacteroidetes; c__Flavobacteriia; o__Flavobacteriales; f__Flavobacteriaceae; g__Tenacibaculum; s__Tenacibaculum ovolyticum	d__Bacteria; p__Bacteroidota; c__Bacteroidia; o__Flavobacteriales; f__Flavobacteriaceae; g__Tenacibaculum; s__Tenacibaculum ovolyticum	no
GCA_004345825.1	Tenacibaculum skagerrakense	d__Bacteria; p__Bacteroidetes; c__Flavobacteriia; o__Flavobacteriales; f__Flavobacteriaceae; g__Tenacibaculum; s__Tenacibaculum skagerrakense	d__Bacteria; p__Bacteroidota; c__Bacteroidia; o__Flavobacteriales; f__Flavobacteriaceae; g__Tenacibaculum; s__Tenacibaculum skagerrakense	yes	186571	yes	no		no
GCA_003688405.1	Ulvibacter antarcticus	d__Bacteria; p__Bacteroidetes; c__Flavobacteriia; o__Flavobacteriales; f__Flavobacteriaceae; g__Ulvibacter; s__Ulvibacter antarcticus	d__Bacteria; p__Bacteroidota; c__Bacteroidia; o__Flavobacteriales; f__Flavobacteriaceae; g__Ulvibacter; s__Ulvibacter antarcticus	yes	442714	yes	yes	4.8e-05	yes
GCA_900102055.1	Ulvibacter litoralis	d__Bacteria; p__Bacteroidetes; c__Flavobacteriia; o__Flavobacteriales; f__Flavobacteriaceae; g__Ulvibacter; s__Ulvibacter litoralis	d__Bacteria; p__Bacteroidota; c__Bacteroidia; o__Flavobacteriales; f__Flavobacteriaceae; g__Ulvibacter; s__Ulvibacter litoralis	yes	227084	yes	yes	6.2e-05	yes
GCA_001697185.1	Wenyingzhuangia fucanilytica	d__Bacteria; p__Bacteroidetes; c__Flavobacteriia; o__Flavobacteriales; f__Flavobacteriaceae; g__Wenyingzhuangia; s__Wenyingzhuangia fucanilytica	d__Bacteria; p__Bacteroidota; c__Bacteroidia; o__Flavobacteriales; f__Flavobacteriaceae; g__Wenyingzhuangia; s__Wenyingzhuangia fucanilytica	yes	1790137	yes	no		no
GCA_900130035.1	Wenyingzhuangia marina	d__Bacteria; p__Bacteroidetes; c__Flavobacteriia; o__Flavobacteriales; f__Flavobacteriaceae; g__Wenyingzhuangia; s__Wenyingzhuangia marina	d__Bacteria; p__Bacteroidota; c__Bacteroidia; o__Flavobacteriales; f__Flavobacteriaceae; g__Wenyingzhuangia; s__Wenyingzhuangia marina	yes	1195760	yes	no		no
GCA_003362725.1	Winogradskyella aurantiaca	d__Bacteria; p__Bacteroidetes; c__Flavobacteriia; o__Flavobacteriales; f__Flavobacteriaceae; g__Winogradskyella; s__Winogradskyella aurantiaca	d__Bacteria; p__Bacteroidota; c__Bacteroidia; o__Flavobacteriales; f__Flavobacteriaceae; g__Winogradskyella; s__Winogradskyella aurantiaca	no
GCA_002266855.1	Winogradskyella aurantia	d__Bacteria; p__Bacteroidetes; c__Flavobacteriia; o__Flavobacteriales; f__Flavobacteriaceae; g__Winogradskyella; s__Winogradskyella aurantia	d__Bacteria; p__Bacteroidota; c__Bacteroidia; o__Flavobacteriales; f__Flavobacteriaceae; g__Winogradskyella; s__Winogradskyella aurantia	yes	1915063	yes	yes	0.00022	yes
GCA_003217215.1	Winogradskyella epiphytica	d__Bacteria; p__Bacteroidetes; c__Flavobacteriia; o__Flavobacteriales; f__Flavobacteriaceae; g__Winogradskyella; s__Winogradskyella epiphytica	d__Bacteria; p__Bacteroidota; c__Bacteroidia; o__Flavobacteriales; f__Flavobacteriaceae; g__Winogradskyella; s__Winogradskyella epiphytica	yes	262005	yes	yes	0.0004	yes
GCA_900129745.1	Winogradskyella jejuensis	d__Bacteria; p__Bacteroidetes; c__Flavobacteriia; o__Flavobacteriales; f__Flavobacteriaceae; g__Winogradskyella; s__Winogradskyella jejuensis	d__Bacteria; p__Bacteroidota; c__Bacteroidia; o__Flavobacteriales; f__Flavobacteriaceae; g__Winogradskyella; s__Winogradskyella jejuensis	yes	1089305	yes	yes	0.00022	yes
GCA_000427335.1	Winogradskyella psychrotolerans RS-3	d__Bacteria; p__Bacteroidetes; c__Flavobacteriia; o__Flavobacteriales; f__Flavobacteriaceae; g__Winogradskyella; s__Winogradskyella psychrotolerans	d__Bacteria; p__Bacteroidota; c__Bacteroidia; o__Flavobacteriales; f__Flavobacteriaceae; g__Winogradskyella; s__Winogradskyella psychrotolerans	yes	641526	yes	yes	5.9e-05	yes
GCA_003387355.1	Winogradskyella sediminis	d__Bacteria; p__Bacteroidetes; c__Flavobacteriia; o__Flavobacteriales; f__Flavobacteriaceae; g__Winogradskyella; s__Winogradskyella sediminis	d__Bacteria; p__Bacteroidota; c__Bacteroidia; o__Flavobacteriales; f__Flavobacteriaceae; g__Winogradskyella; s__Winogradskyella sediminis	yes	1382466	yes	yes	5.9e-05	yes
GCA_003260205.1	Winogradskyella tangerina	d__Bacteria; p__Bacteroidetes; c__Flavobacteriia; o__Flavobacteriales; f__Flavobacteriaceae; g__Winogradskyella; s__Winogradskyella tangerina	d__Bacteria; p__Bacteroidota; c__Bacteroidia; o__Flavobacteriales; f__Flavobacteriaceae; g__Winogradskyella; s__Winogradskyella tangerina	no
GCA_900099995.1	Winogradskyella thalassocola	d__Bacteria; p__Bacteroidetes; c__Flavobacteriia; o__Flavobacteriales; f__Flavobacteriaceae; g__Winogradskyella; s__Winogradskyella thalassocola	d__Bacteria; p__Bacteroidota; c__Bacteroidia; o__Flavobacteriales; f__Flavobacteriaceae; g__Winogradskyella; s__Winogradskyella thalassocola	yes	262004	yes	yes	5.9e-05	yes
GCA_004346845.1	Winogradskyella wandonensis	d__Bacteria; p__Bacteroidetes; c__Flavobacteriia; o__Flavobacteriales; f__Flavobacteriaceae; g__Winogradskyella; s__Winogradskyella wandonensis	d__Bacteria; p__Bacteroidota; c__Bacteroidia; o__Flavobacteriales; f__Flavobacteriaceae; g__Winogradskyella; s__Winogradskyella wandonensis	yes	1442586	yes	yes	0.00022	yes
GCA_000348685.1	Xanthomarina gelatinilytica	d__Bacteria; p__Bacteroidetes; c__Flavobacteriia; o__Flavobacteriales; f__Flavobacteriaceae; g__Xanthomarina; s__Xanthomarina gelatinilytica	d__Bacteria; p__Bacteroidota; c__Bacteroidia; o__Flavobacteriales; f__Flavobacteriaceae; g__Xanthomarina; s__Xanthomarina gelatinilytica	yes	1137281	yes	yes	3.5e-05	yes
GCA_003148645.1	Formosa spongicola	d__Bacteria; p__Bacteroidetes; c__Flavobacteriia; o__Flavobacteriales; f__Flavobacteriaceae; g__Formosa; s__Formosa spongicola	d__Bacteria; p__Bacteroidota; c__Bacteroidia; o__Flavobacteriales; f__Flavobacteriaceae; g__Xanthomarina; s__Xanthomarina spongicola	yes	570520	yes	yes	9.6e-06	yes
GCA_004362865.1	Zeaxanthinibacter enoshimensis	d__Bacteria; p__Bacteroidetes; c__Flavobacteriia; o__Flavobacteriales; f__Flavobacteriaceae; g__Zeaxanthinibacter; s__Zeaxanthinibacter enoshimensis	d__Bacteria; p__Bacteroidota; c__Bacteroidia; o__Flavobacteriales; f__Flavobacteriaceae; g__Zeaxanthinibacter; s__Zeaxanthinibacter enoshimensis	yes	392009	yes	yes	0.021	yes
GCA_900116365.1	Zhouia amylolytica	d__Bacteria; p__Bacteroidetes; c__Flavobacteriia; o__Flavobacteriales; f__Flavobacteriaceae; g__Zhouia; s__Zhouia amylolytica	d__Bacteria; p__Bacteroidota; c__Bacteroidia; o__Flavobacteriales; f__Flavobacteriaceae; g__Zhouia; s__Zhouia amylolytica	yes	376730	yes	no		no
GCA_000973105.1	Zobellia galactanivorans	d__Bacteria; p__Bacteroidetes; c__Flavobacteriia; o__Flavobacteriales; f__Flavobacteriaceae; g__Zobellia; s__Zobellia galactanivorans	d__Bacteria; p__Bacteroidota; c__Bacteroidia; o__Flavobacteriales; f__Flavobacteriaceae; g__Zobellia; s__Zobellia galactanivorans	no
GCA_900156625.1	Zobellia uliginosa	d__Bacteria; p__Bacteroidetes; c__Flavobacteriia; o__Flavobacteriales; f__Flavobacteriaceae; g__Zobellia; s__Zobellia uliginosa	d__Bacteria; p__Bacteroidota; c__Bacteroidia; o__Flavobacteriales; f__Flavobacteriaceae; g__Zobellia; s__Zobellia uliginosa	no
GCA_002094855.1	Zunongwangia atlantica 22II14-10F7	d__Bacteria; p__Bacteroidetes; c__Flavobacteriia; o__Flavobacteriales; f__Flavobacteriaceae; g__Zunongwangia; s__Zunongwangia atlantica	d__Bacteria; p__Bacteroidota; c__Bacteroidia; o__Flavobacteriales; f__Flavobacteriaceae; g__Zunongwangia; s__Zunongwangia atlantica	yes	1185767	yes	no		no
GCA_900112105.1	Zunongwangia mangrovi	d__Bacteria; p__Bacteroidetes; c__Flavobacteriia; o__Flavobacteriales; f__Flavobacteriaceae; g__Zunongwangia; s__Zunongwangia mangrovi	d__Bacteria; p__Bacteroidota; c__Bacteroidia; o__Flavobacteriales; f__Flavobacteriaceae; g__Zunongwangia; s__Zunongwangia mangrovi	yes	1334022	yes	no		no
GCA_000023465.1	Zunongwangia profunda SM-A87	d__Bacteria; p__Bacteroidetes; c__Flavobacteriia; o__Flavobacteriales; f__Flavobacteriaceae; g__Zunongwangia; s__Zunongwangia profunda	d__Bacteria; p__Bacteroidota; c__Bacteroidia; o__Flavobacteriales; f__Flavobacteriaceae; g__Zunongwangia; s__Zunongwangia profunda	yes	655815	yes	no		no
GCA_002369955.1	Ichthyobacterium seriolicida	d__Bacteria; p__Bacteroidetes; c__Flavobacteriia; o__Flavobacteriales; f__Ichthyobacteriaceae; g__Ichthyobacterium; s__Ichthyobacterium seriolicida	d__Bacteria; p__Bacteroidota; c__Bacteroidia; o__Flavobacteriales; f__Ichthyobacteriaceae; g__Ichthyobacterium; s__Ichthyobacterium seriolicida	yes	242600	yes	no		no
GCA_000236705.1	Owenweeksia hongkongensis DSM 17368	d__Bacteria; p__Bacteroidetes; c__Flavobacteriia; o__Flavobacteriales; f__Cryomorphaceae; g__Owenweeksia; s__Owenweeksia hongkongensis	d__Bacteria; p__Bacteroidota; c__Bacteroidia; o__Flavobacteriales; f__Schleiferiaceae; g__Owenweeksia; s__Owenweeksia hongkongensis	yes	926562	yes	no		no
GCA_003337435.1	Schleiferia thermophila	d__Bacteria; p__Bacteroidetes; c__Flavobacteriia; o__Flavobacteriales; f__Schleiferiaceae; g__Schleiferia; s__Schleiferia thermophila	d__Bacteria; p__Bacteroidota; c__Bacteroidia; o__Flavobacteriales; f__Schleiferiaceae; g__Schleiferia; s__Schleiferia thermophila	yes	884107	yes	yes	0.0032	yes
GCA_900115015.1	Algoriella xinjiangensis	d__Bacteria; p__Bacteroidetes; c__Flavobacteriia; o__Flavobacteriales; f__Flavobacteriaceae; g__Algoriella; s__Algoriella xinjiangensis	d__Bacteria; p__Bacteroidota; c__Bacteroidia; o__Flavobacteriales; f__Weeksellaceae; g__Algoriella; s__Algoriella xinjiangensis	yes	684065	yes	no		no
GCA_002964975.1	Apibacter adventoris	d__Bacteria; p__Bacteroidetes; c__Flavobacteriia; o__Flavobacteriales; f__Flavobacteriaceae; g__Apibacter; s__Apibacter adventoris	d__Bacteria; p__Bacteroidota; c__Bacteroidia; o__Flavobacteriales; f__Weeksellaceae; g__Apibacter; s__Apibacter adventoris	yes	1679466	yes	no		no
GCA_001418685.1	Apibacter mensalis	d__Bacteria; p__Bacteroidetes; c__Flavobacteriia; o__Flavobacteriales; f__Flavobacteriaceae; g__Apibacter; s__Apibacter mensalis	d__Bacteria; p__Bacteroidota; c__Bacteroidia; o__Flavobacteriales; f__Weeksellaceae; g__Apibacter; s__Apibacter mensalis	no
GCA_000301075.1	Bergeyella zoohelcum ATCC 43767	d__Bacteria; p__Bacteroidetes; c__Flavobacteriia; o__Flavobacteriales; f__Flavobacteriaceae; g__Bergeyella; s__Bergeyella zoohelcum	d__Bacteria; p__Bacteroidota; c__Bacteroidia; o__Flavobacteriales; f__Weeksellaceae; g__Bergeyella; s__Bergeyella zoohelcum	yes	883096	yes	no		no
GCA_900142565.1	Chishuiella changwenlii	d__Bacteria; p__Bacteroidetes; c__Flavobacteriia; o__Flavobacteriales; f__Flavobacteriaceae; g__Chishuiella; s__Chishuiella changwenlii	d__Bacteria; p__Bacteroidota; c__Bacteroidia; o__Flavobacteriales; f__Weeksellaceae; g__Chishuiella; s__Chishuiella changwenlii	yes	1434701	yes	no		no
GCA_001045465.1	Chryseobacterium angstadtii	d__Bacteria; p__Bacteroidetes; c__Flavobacteriia; o__Flavobacteriales; f__Flavobacteriaceae; g__Chryseobacterium; s__Chryseobacterium angstadtii	d__Bacteria; p__Bacteroidota; c__Bacteroidia; o__Flavobacteriales; f__Weeksellaceae; g__Chryseobacterium; s__Chryseobacterium angstadtii	yes	558151	yes	no		no
GCA_001420285.1	Chryseobacterium aquaticum	d__Bacteria; p__Bacteroidetes; c__Flavobacteriia; o__Flavobacteriales; f__Flavobacteriaceae; g__Chryseobacterium; s__Chryseobacterium aquaticum	d__Bacteria; p__Bacteroidota; c__Bacteroidia; o__Flavobacteriales; f__Weeksellaceae; g__Chryseobacterium; s__Chryseobacterium aquaticum	yes	452084	yes	no		no
GCA_900129245.1	Chryseobacterium arachidis	d__Bacteria; p__Bacteroidetes; c__Flavobacteriia; o__Flavobacteriales; f__Flavobacteriaceae; g__Chryseobacterium; s__Chryseobacterium arachidis	d__Bacteria; p__Bacteroidota; c__Bacteroidia; o__Flavobacteriales; f__Weeksellaceae; g__Chryseobacterium; s__Chryseobacterium arachidis	yes	1416778	yes	no		no
GCA_001684965.1	Chryseobacterium arthrosphaerae	d__Bacteria; p__Bacteroidetes; c__Flavobacteriia; o__Flavobacteriales; f__Flavobacteriaceae; g__Chryseobacterium; s__Chryseobacterium arthrosphaerae	d__Bacteria; p__Bacteroidota; c__Bacteroidia; o__Flavobacteriales; f__Weeksellaceae; g__Chryseobacterium; s__Chryseobacterium arthrosphaerae	yes	651561	yes	no		no
GCA_001684975.1	Chryseobacterium artocarpi	d__Bacteria; p__Bacteroidetes; c__Flavobacteriia; o__Flavobacteriales; f__Flavobacteriaceae; g__Chryseobacterium; s__Chryseobacterium artocarpi	d__Bacteria; p__Bacteroidota; c__Bacteroidia; o__Flavobacteriales; f__Weeksellaceae; g__Chryseobacterium; s__Chryseobacterium artocarpi	yes	1414727	yes	no		no
GCA_003020585.1	Chryseobacterium aurantiacum	d__Bacteria; p__Bacteroidetes; c__Flavobacteriia; o__Flavobacteriales; f__Flavobacteriaceae; g__Chryseobacterium; s__Chryseobacterium aurantiacum	d__Bacteria; p__Bacteroidota; c__Bacteroidia; o__Flavobacteriales; f__Weeksellaceae; g__Chryseobacterium; s__Chryseobacterium aurantiacum	no
GCA_900168205.1	Chryseobacterium balustinum	d__Bacteria; p__Bacteroidetes; c__Flavobacteriia; o__Flavobacteriales; f__Flavobacteriaceae; g__Chryseobacterium; s__Chryseobacterium balustinum	d__Bacteria; p__Bacteroidota; c__Bacteroidia; o__Flavobacteriales; f__Weeksellaceae; g__Chryseobacterium; s__Chryseobacterium balustinum	yes	246	yes	no		no
GCA_002770595.1	Chryseobacterium camelliae	d__Bacteria; p__Bacteroidetes; c__Flavobacteriia; o__Flavobacteriales; f__Flavobacteriaceae; g__Chryseobacterium; s__Chryseobacterium camelliae	d__Bacteria; p__Bacteroidota; c__Bacteroidia; o__Flavobacteriales; f__Weeksellaceae; g__Chryseobacterium; s__Chryseobacterium camelliae	no
GCA_900142785.1	Chryseobacterium carnipullorum	d__Bacteria; p__Bacteroidetes; c__Flavobacteriia; o__Flavobacteriales; f__Flavobacteriaceae; g__Chryseobacterium; s__Chryseobacterium carnipullorum	d__Bacteria; p__Bacteroidota; c__Bacteroidia; o__Flavobacteriales; f__Weeksellaceae; g__Chryseobacterium; s__Chryseobacterium carnipullorum	yes	1124835	yes	no		no
GCA_001684955.1	Chryseobacterium contaminans	d__Bacteria; p__Bacteroidetes; c__Flavobacteriia; o__Flavobacteriales; f__Flavobacteriaceae; g__Chryseobacterium; s__Chryseobacterium contaminans	d__Bacteria; p__Bacteroidota; c__Bacteroidia; o__Flavobacteriales; f__Weeksellaceae; g__Chryseobacterium; s__Chryseobacterium contaminans	yes	1423959	yes	no		no
GCA_001593385.1	Chryseobacterium cucumeris	d__Bacteria; p__Bacteroidetes; c__Flavobacteriia; o__Flavobacteriales; f__Flavobacteriaceae; g__Chryseobacterium; s__Chryseobacterium cucumeris	d__Bacteria; p__Bacteroidota; c__Bacteroidia; o__Flavobacteriales; f__Weeksellaceae; g__Chryseobacterium; s__Chryseobacterium cucumeris	yes	1813611	yes	no		no
GCA_900108365.1	Chryseobacterium culicis	d__Bacteria; p__Bacteroidetes; c__Flavobacteriia; o__Flavobacteriales; f__Flavobacteriaceae; g__Chryseobacterium; s__Chryseobacterium culicis	d__Bacteria; p__Bacteroidota; c__Bacteroidia; o__Flavobacteriales; f__Weeksellaceae; g__Chryseobacterium; s__Chryseobacterium culicis	yes	680127	yes	no		no
GCA_003729955.1	Chryseobacterium daecheongense	d__Bacteria; p__Bacteroidetes; c__Flavobacteriia; o__Flavobacteriales; f__Flavobacteriaceae; g__Chryseobacterium; s__Chryseobacterium daecheongense	d__Bacteria; p__Bacteroidota; c__Bacteroidia; o__Flavobacteriales; f__Weeksellaceae; g__Chryseobacterium; s__Chryseobacterium daecheongense	yes	192389	yes	no		no
GCA_000430825.1	Chryseobacterium daeguense DSM 19388	d__Bacteria; p__Bacteroidetes; c__Flavobacteriia; o__Flavobacteriales; f__Flavobacteriaceae; g__Chryseobacterium; s__Chryseobacterium daeguense	d__Bacteria; p__Bacteroidota; c__Bacteroidia; o__Flavobacteriales; f__Weeksellaceae; g__Chryseobacterium; s__Chryseobacterium daeguense	no
GCA_003634775.1	Chryseobacterium defluvii	d__Bacteria; p__Bacteroidetes; c__Flavobacteriia; o__Flavobacteriales; f__Flavobacteriaceae; g__Chryseobacterium; s__Chryseobacterium defluvii	d__Bacteria; p__Bacteroidota; c__Bacteroidia; o__Flavobacteriales; f__Weeksellaceae; g__Chryseobacterium; s__Chryseobacterium defluvii	yes	160396	yes	no		no
GCA_003385495.1	Chryseobacterium elymi	d__Bacteria; p__Bacteroidetes; c__Flavobacteriia; o__Flavobacteriales; f__Flavobacteriaceae; g__Chryseobacterium; s__Chryseobacterium elymi	d__Bacteria; p__Bacteroidota; c__Bacteroidia; o__Flavobacteriales; f__Weeksellaceae; g__Chryseobacterium; s__Chryseobacterium elymi	yes	395936	yes	no		no
GCA_003385595.1	Chryseobacterium flavum	d__Bacteria; p__Bacteroidetes; c__Flavobacteriia; o__Flavobacteriales; f__Flavobacteriaceae; g__Chryseobacterium; s__Chryseobacterium flavum	d__Bacteria; p__Bacteroidota; c__Bacteroidia; o__Flavobacteriales; f__Weeksellaceae; g__Chryseobacterium; s__Chryseobacterium flavum	yes	415851	yes	no		no
GCA_900116415.1	Chryseobacterium formosense	d__Bacteria; p__Bacteroidetes; c__Flavobacteriia; o__Flavobacteriales; f__Flavobacteriaceae; g__Chryseobacterium; s__Chryseobacterium formosense	d__Bacteria; p__Bacteroidota; c__Bacteroidia; o__Flavobacteriales; f__Weeksellaceae; g__Chryseobacterium; s__Chryseobacterium formosense	yes	236814	yes	no		no
GCA_001021975.1	Chryseobacterium gallinarum	d__Bacteria; p__Bacteroidetes; c__Flavobacteriia; o__Flavobacteriales; f__Flavobacteriaceae; g__Chryseobacterium; s__Chryseobacterium gallinarum	d__Bacteria; p__Bacteroidota; c__Bacteroidia; o__Flavobacteriales; f__Weeksellaceae; g__Chryseobacterium; s__Chryseobacterium gallinarum	yes	1324352	yes	no		no
GCA_900156825.1	Chryseobacterium gambrini	d__Bacteria; p__Bacteroidetes; c__Flavobacteriia; o__Flavobacteriales; f__Flavobacteriaceae; g__Chryseobacterium; s__Chryseobacterium gambrini	d__Bacteria; p__Bacteroidota; c__Bacteroidia; o__Flavobacteriales; f__Weeksellaceae; g__Chryseobacterium; s__Chryseobacterium gambrini	yes	373672	yes	no		no
GCA_002797535.1	Chryseobacterium geocarposphaerae	d__Bacteria; p__Bacteroidetes; c__Flavobacteriia; o__Flavobacteriales; f__Flavobacteriaceae; g__Chryseobacterium; s__Chryseobacterium geocarposphaerae	d__Bacteria; p__Bacteroidota; c__Bacteroidia; o__Flavobacteriales; f__Weeksellaceae; g__Chryseobacterium; s__Chryseobacterium geocarposphaerae	yes	1416776	yes	no		no
GCA_001648155.1	Chryseobacterium glaciei	d__Bacteria; p__Bacteroidetes; c__Flavobacteriia; o__Flavobacteriales; f__Flavobacteriaceae; g__Chryseobacterium; s__Chryseobacterium glaciei	d__Bacteria; p__Bacteroidota; c__Bacteroidia; o__Flavobacteriales; f__Weeksellaceae; g__Chryseobacterium; s__Chryseobacterium glaciei	yes	1685010	yes	no		no
GCA_900636535.1	Chryseobacterium gleum	d__Bacteria; p__Bacteroidetes; c__Flavobacteriia; o__Flavobacteriales; f__Flavobacteriaceae; g__Chryseobacterium; s__Chryseobacterium gleum	d__Bacteria; p__Bacteroidota; c__Bacteroidia; o__Flavobacteriales; f__Weeksellaceae; g__Chryseobacterium; s__Chryseobacterium gleum	no
GCA_001507325.1	Chryseobacterium greenlandense	d__Bacteria; p__Bacteroidetes; c__Flavobacteriia; o__Flavobacteriales; f__Flavobacteriaceae; g__Chryseobacterium; s__Chryseobacterium greenlandense	d__Bacteria; p__Bacteroidota; c__Bacteroidia; o__Flavobacteriales; f__Weeksellaceae; g__Chryseobacterium; s__Chryseobacterium greenlandense	yes	345663	yes	no		no
GCA_000430845.1	Chryseobacterium gregarium DSM 19109	d__Bacteria; p__Bacteroidetes; c__Flavobacteriia; o__Flavobacteriales; f__Flavobacteriaceae; g__Chryseobacterium; s__Chryseobacterium gregarium	d__Bacteria; p__Bacteroidota; c__Bacteroidia; o__Flavobacteriales; f__Weeksellaceae; g__Chryseobacterium; s__Chryseobacterium gregarium	no
GCA_000708615.2	Chryseobacterium hispalense DSM 25574	d__Bacteria; p__Bacteroidetes; c__Flavobacteriia; o__Flavobacteriales; f__Flavobacteriaceae; g__Chryseobacterium; s__Chryseobacterium hispalense	d__Bacteria; p__Bacteroidota; c__Bacteroidia; o__Flavobacteriales; f__Weeksellaceae; g__Chryseobacterium; s__Chryseobacterium hispalense	no
GCA_900113975.1	Chryseobacterium indologenes	d__Bacteria; p__Bacteroidetes; c__Flavobacteriia; o__Flavobacteriales; f__Flavobacteriaceae; g__Chryseobacterium; s__Chryseobacterium indologenes	d__Bacteria; p__Bacteroidota; c__Bacteroidia; o__Flavobacteriales; f__Weeksellaceae; g__Chryseobacterium; s__Chryseobacterium indologenes	yes	253	yes	no		no
GCA_003815915.1	Chryseobacterium indoltheticum	d__Bacteria; p__Bacteroidetes; c__Flavobacteriia; o__Flavobacteriales; f__Flavobacteriaceae; g__Chryseobacterium; s__Chryseobacterium indoltheticum	d__Bacteria; p__Bacteroidota; c__Bacteroidia; o__Flavobacteriales; f__Weeksellaceae; g__Chryseobacterium; s__Chryseobacterium indoltheticum	yes	254	yes	no		no
GCA_900100075.1	Chryseobacterium jejuense	d__Bacteria; p__Bacteroidetes; c__Flavobacteriia; o__Flavobacteriales; f__Flavobacteriaceae; g__Chryseobacterium; s__Chryseobacterium jejuense	d__Bacteria; p__Bacteroidota; c__Bacteroidia; o__Flavobacteriales; f__Weeksellaceae; g__Chryseobacterium; s__Chryseobacterium jejuense	yes	445960	yes	no		no
GCA_003815775.1	Chryseobacterium joostei	d__Bacteria; p__Bacteroidetes; c__Flavobacteriia; o__Flavobacteriales; f__Flavobacteriaceae; g__Chryseobacterium; s__Chryseobacterium joostei	d__Bacteria; p__Bacteroidota; c__Bacteroidia; o__Flavobacteriales; f__Weeksellaceae; g__Chryseobacterium; s__Chryseobacterium joostei	yes	112234	yes	no		no
GCA_001563495.1	Chryseobacterium kwangjuense	d__Bacteria; p__Bacteroidetes; c__Flavobacteriia; o__Flavobacteriales; f__Flavobacteriaceae; g__Chryseobacterium; s__Chryseobacterium kwangjuense	d__Bacteria; p__Bacteroidota; c__Bacteroidia; o__Flavobacteriales; f__Weeksellaceae; g__Chryseobacterium; s__Chryseobacterium kwangjuense	yes	267125	yes	no		no
GCA_003290185.1	Chryseobacterium lathyri	d__Bacteria; p__Bacteroidetes; c__Flavobacteriia; o__Flavobacteriales; f__Flavobacteriaceae; g__Chryseobacterium; s__Chryseobacterium lathyri	d__Bacteria; p__Bacteroidota; c__Bacteroidia; o__Flavobacteriales; f__Weeksellaceae; g__Chryseobacterium; s__Chryseobacterium lathyri	no
GCA_900114875.1	Chryseobacterium limigenitum	d__Bacteria; p__Bacteroidetes; c__Flavobacteriia; o__Flavobacteriales; f__Flavobacteriaceae; g__Chryseobacterium; s__Chryseobacterium limigenitum	d__Bacteria; p__Bacteroidota; c__Bacteroidia; o__Flavobacteriales; f__Weeksellaceae; g__Chryseobacterium; s__Chryseobacterium limigenitum	yes	1612149	yes	no		no
GCA_000737785.1	Chryseobacterium luteum	d__Bacteria; p__Bacteroidetes; c__Flavobacteriia; o__Flavobacteriales; f__Flavobacteriaceae; g__Chryseobacterium; s__Chryseobacterium luteum	d__Bacteria; p__Bacteroidota; c__Bacteroidia; o__Flavobacteriales; f__Weeksellaceae; g__Chryseobacterium; s__Chryseobacterium luteum	yes	421531	yes	no		no
GCA_002177115.1	Chryseobacterium mucoviscidosis	d__Bacteria; p__Bacteroidetes; c__Flavobacteriia; o__Flavobacteriales; f__Flavobacteriaceae; g__Chryseobacterium; s__Chryseobacterium mucoviscidosis	d__Bacteria; p__Bacteroidota; c__Bacteroidia; o__Flavobacteriales; f__Weeksellaceae; g__Chryseobacterium; s__Chryseobacterium mucoviscidosis	yes	1945581	yes	no		no
GCA_900637665.1	Chryseobacterium nakagawai	d__Bacteria; p__Bacteroidetes; c__Flavobacteriia; o__Flavobacteriales; f__Flavobacteriaceae; g__Chryseobacterium; s__Chryseobacterium nakagawai	d__Bacteria; p__Bacteroidota; c__Bacteroidia; o__Flavobacteriales; f__Weeksellaceae; g__Chryseobacterium; s__Chryseobacterium nakagawai	no
GCA_900115055.1	Chryseobacterium oleae	d__Bacteria; p__Bacteroidetes; c__Flavobacteriia; o__Flavobacteriales; f__Flavobacteriaceae; g__Chryseobacterium; s__Chryseobacterium oleae	d__Bacteria; p__Bacteroidota; c__Bacteroidia; o__Flavobacteriales; f__Weeksellaceae; g__Chryseobacterium; s__Chryseobacterium oleae	yes	491207	yes	no		no
GCA_002899895.2	Chryseobacterium oncorhynchi	d__Bacteria; p__Bacteroidetes; c__Flavobacteriia; o__Flavobacteriales; f__Flavobacteriaceae; g__Chryseobacterium; s__Chryseobacterium oncorhynchi	d__Bacteria; p__Bacteroidota; c__Bacteroidia; o__Flavobacteriales; f__Weeksellaceae; g__Chryseobacterium; s__Chryseobacterium oncorhynchi	yes	741074	yes	no		no
GCA_900129755.1	Chryseobacterium oranimense	d__Bacteria; p__Bacteroidetes; c__Flavobacteriia; o__Flavobacteriales; f__Flavobacteriaceae; g__Chryseobacterium; s__Chryseobacterium oranimense	d__Bacteria; p__Bacteroidota; c__Bacteroidia; o__Flavobacteriales; f__Weeksellaceae; g__Chryseobacterium; s__Chryseobacterium oranimense	yes	421058	yes	no		no
GCA_002285635.2	Chryseobacterium piperi	d__Bacteria; p__Bacteroidetes; c__Flavobacteriia; o__Flavobacteriales; f__Flavobacteriaceae; g__Chryseobacterium; s__Chryseobacterium piperi	d__Bacteria; p__Bacteroidota; c__Bacteroidia; o__Flavobacteriales; f__Weeksellaceae; g__Chryseobacterium; s__Chryseobacterium piperi	yes	558152	yes	no		no
GCA_900156685.1	Chryseobacterium piscicola	d__Bacteria; p__Bacteroidetes; c__Flavobacteriia; o__Flavobacteriales; f__Flavobacteriaceae; g__Chryseobacterium; s__Chryseobacterium piscicola	d__Bacteria; p__Bacteroidota; c__Bacteroidia; o__Flavobacteriales; f__Weeksellaceae; g__Chryseobacterium; s__Chryseobacterium piscicola	yes	551459	yes	no		no
GCA_003385415.1	Chryseobacterium piscium	d__Bacteria; p__Bacteroidetes; c__Flavobacteriia; o__Flavobacteriales; f__Flavobacteriaceae; g__Chryseobacterium; s__Chryseobacterium piscium	d__Bacteria; p__Bacteroidota; c__Bacteroidia; o__Flavobacteriales; f__Weeksellaceae; g__Chryseobacterium; s__Chryseobacterium piscium	yes	333702	yes	no		no
GCA_900142445.1	Chryseobacterium polytrichastri	d__Bacteria; p__Bacteroidetes; c__Flavobacteriia; o__Flavobacteriales; f__Flavobacteriaceae; g__Chryseobacterium; s__Chryseobacterium polytrichastri	d__Bacteria; p__Bacteroidota; c__Bacteroidia; o__Flavobacteriales; f__Weeksellaceae; g__Chryseobacterium; s__Chryseobacterium polytrichastri	yes	1302687	yes	no		no
GCA_003385455.1	Chryseobacterium rhizosphaerae	d__Bacteria; p__Bacteroidetes; c__Flavobacteriia; o__Flavobacteriales; f__Flavobacteriaceae; g__Chryseobacterium; s__Chryseobacterium rhizosphaerae	d__Bacteria; p__Bacteroidota; c__Bacteroidia; o__Flavobacteriales; f__Weeksellaceae; g__Chryseobacterium; s__Chryseobacterium rhizosphaerae	yes	395937	yes	no		no
GCA_900143185.1	Chryseobacterium scophthalmum	d__Bacteria; p__Bacteroidetes; c__Flavobacteriia; o__Flavobacteriales; f__Flavobacteriaceae; g__Chryseobacterium; s__Chryseobacterium scophthalmum	d__Bacteria; p__Bacteroidota; c__Bacteroidia; o__Flavobacteriales; f__Weeksellaceae; g__Chryseobacterium; s__Chryseobacterium scophthalmum	yes	59733	yes	no		no
GCA_900156575.1	Chryseobacterium shigense	d__Bacteria; p__Bacteroidetes; c__Flavobacteriia; o__Flavobacteriales; f__Flavobacteriaceae; g__Chryseobacterium; s__Chryseobacterium shigense	d__Bacteria; p__Bacteroidota; c__Bacteroidia; o__Flavobacteriales; f__Weeksellaceae; g__Chryseobacterium; s__Chryseobacterium shigense	yes	297244	yes	no		no
GCA_900100115.1	Chryseobacterium soldanellicola	d__Bacteria; p__Bacteroidetes; c__Flavobacteriia; o__Flavobacteriales; f__Flavobacteriaceae; g__Chryseobacterium; s__Chryseobacterium soldanellicola	d__Bacteria; p__Bacteroidota; c__Bacteroidia; o__Flavobacteriales; f__Weeksellaceae; g__Chryseobacterium; s__Chryseobacterium soldanellicola	yes	311333	yes	no		no
GCA_000737705.1	Chryseobacterium soli	d__Bacteria; p__Bacteroidetes; c__Flavobacteriia; o__Flavobacteriales; f__Flavobacteriaceae; g__Chryseobacterium; s__Chryseobacterium soli	d__Bacteria; p__Bacteroidota; c__Bacteroidia; o__Flavobacteriales; f__Weeksellaceae; g__Chryseobacterium; s__Chryseobacterium soli	yes	445961	yes	no		no
GCA_900099685.1	Chryseobacterium taeanense	d__Bacteria; p__Bacteroidetes; c__Flavobacteriia; o__Flavobacteriales; f__Flavobacteriaceae; g__Chryseobacterium; s__Chryseobacterium taeanense	d__Bacteria; p__Bacteroidota; c__Bacteroidia; o__Flavobacteriales; f__Weeksellaceae; g__Chryseobacterium; s__Chryseobacterium taeanense	yes	311334	yes	no		no
GCA_900109935.1	Chryseobacterium taichungense	d__Bacteria; p__Bacteroidetes; c__Flavobacteriia; o__Flavobacteriales; f__Flavobacteriaceae; g__Chryseobacterium; s__Chryseobacterium taichungense	d__Bacteria; p__Bacteroidota; c__Bacteroidia; o__Flavobacteriales; f__Weeksellaceae; g__Chryseobacterium; s__Chryseobacterium taichungense	yes	295069	yes	no		no
GCA_900103755.1	Chryseobacterium taihuense	d__Bacteria; p__Bacteroidetes; c__Flavobacteriia; o__Flavobacteriales; f__Flavobacteriaceae; g__Chryseobacterium; s__Chryseobacterium taihuense	d__Bacteria; p__Bacteroidota; c__Bacteroidia; o__Flavobacteriales; f__Weeksellaceae; g__Chryseobacterium; s__Chryseobacterium taihuense	yes	1141221	yes	no		no
GCA_900129385.1	Chryseobacterium takakiae	d__Bacteria; p__Bacteroidetes; c__Flavobacteriia; o__Flavobacteriales; f__Flavobacteriaceae; g__Chryseobacterium; s__Chryseobacterium takakiae	d__Bacteria; p__Bacteroidota; c__Bacteroidia; o__Flavobacteriales; f__Weeksellaceae; g__Chryseobacterium; s__Chryseobacterium takakiae	yes	1302685	yes	no		no
GCA_900156735.1	Chryseobacterium ureilyticum	d__Bacteria; p__Bacteroidetes; c__Flavobacteriia; o__Flavobacteriales; f__Flavobacteriaceae; g__Chryseobacterium; s__Chryseobacterium ureilyticum	d__Bacteria; p__Bacteroidota; c__Bacteroidia; o__Flavobacteriales; f__Weeksellaceae; g__Chryseobacterium; s__Chryseobacterium ureilyticum	yes	373668	yes	no		no
GCA_002899945.2	Chryseobacterium viscerum	d__Bacteria; p__Bacteroidetes; c__Flavobacteriia; o__Flavobacteriales; f__Flavobacteriaceae; g__Chryseobacterium; s__Chryseobacterium viscerum	d__Bacteria; p__Bacteroidota; c__Bacteroidia; o__Flavobacteriales; f__Weeksellaceae; g__Chryseobacterium; s__Chryseobacterium viscerum	yes	1037377	yes	no		no
GCA_000737765.1	Chryseobacterium vrystaatense	d__Bacteria; p__Bacteroidetes; c__Flavobacteriia; o__Flavobacteriales; f__Flavobacteriaceae; g__Chryseobacterium; s__Chryseobacterium vrystaatense	d__Bacteria; p__Bacteroidota; c__Bacteroidia; o__Flavobacteriales; f__Weeksellaceae; g__Chryseobacterium; s__Chryseobacterium vrystaatense	yes	307480	yes	no		no
GCA_900111495.1	Chryseobacterium wanjuense	d__Bacteria; p__Bacteroidetes; c__Flavobacteriia; o__Flavobacteriales; f__Flavobacteriaceae; g__Chryseobacterium; s__Chryseobacterium wanjuense	d__Bacteria; p__Bacteroidota; c__Bacteroidia; o__Flavobacteriales; f__Weeksellaceae; g__Chryseobacterium; s__Chryseobacterium wanjuense	yes	356305	yes	no		no
GCA_003860565.1	Cloacibacterium normanense	d__Bacteria; p__Bacteroidetes; c__Flavobacteriia; o__Flavobacteriales; f__Flavobacteriaceae; g__Cloacibacterium; s__Cloacibacterium normanense	d__Bacteria; p__Bacteroidota; c__Bacteroidia; o__Flavobacteriales; f__Weeksellaceae; g__Cloacibacterium; s__Cloacibacterium normanense	yes	237258	yes	no		no
GCA_900141665.1	Cruoricaptor ignavus	d__Bacteria; p__Bacteroidetes; c__Flavobacteriia; o__Flavobacteriales; f__Flavobacteriaceae; g__Cruoricaptor; s__Cruoricaptor ignavus	d__Bacteria; p__Bacteroidota; c__Bacteroidia; o__Flavobacteriales; f__Weeksellaceae; g__Cruoricaptor; s__Cruoricaptor ignavus	yes	1118202	yes	no		no
GCA_002023665.2	Elizabethkingia anophelis R26	d__Bacteria; p__Bacteroidetes; c__Flavobacteriia; o__Flavobacteriales; f__Flavobacteriaceae; g__Elizabethkingia; s__Elizabethkingia anophelis	d__Bacteria; p__Bacteroidota; c__Bacteroidia; o__Flavobacteriales; f__Weeksellaceae; g__Elizabethkingia; s__Elizabethkingia anophelis	yes	1246994	yes	no		no
GCA_002024805.1	Elizabethkingia bruuniana	d__Bacteria; p__Bacteroidetes; c__Flavobacteriia; o__Flavobacteriales; f__Flavobacteriaceae; g__Elizabethkingia; s__Elizabethkingia bruuniana	d__Bacteria; p__Bacteroidota; c__Bacteroidia; o__Flavobacteriales; f__Weeksellaceae; g__Elizabethkingia; s__Elizabethkingia bruuniana	yes	1756149	yes	no		no
GCA_000367325.1	Elizabethkingia meningoseptica ATCC 13253 = NBRC 12535	d__Bacteria; p__Bacteroidetes; c__Flavobacteriia; o__Flavobacteriales; f__Flavobacteriaceae; g__Elizabethkingia; s__Elizabethkingia meningoseptica	d__Bacteria; p__Bacteroidota; c__Bacteroidia; o__Flavobacteriales; f__Weeksellaceae; g__Elizabethkingia; s__Elizabethkingia meningoseptica	no
GCA_001675285.1	Elizabethkingia miricola	d__Bacteria; p__Bacteroidetes; c__Flavobacteriia; o__Flavobacteriales; f__Flavobacteriaceae; g__Elizabethkingia; s__Elizabethkingia miricola	d__Bacteria; p__Bacteroidota; c__Bacteroidia; o__Flavobacteriales; f__Weeksellaceae; g__Elizabethkingia; s__Elizabethkingia miricola	yes	172045	yes	no		no
GCA_002023715.1	Elizabethkingia occulta	d__Bacteria; p__Bacteroidetes; c__Flavobacteriia; o__Flavobacteriales; f__Flavobacteriaceae; g__Elizabethkingia; s__Elizabethkingia occulta	d__Bacteria; p__Bacteroidota; c__Bacteroidia; o__Flavobacteriales; f__Weeksellaceae; g__Elizabethkingia; s__Elizabethkingia occulta	yes	1867263	yes	no		no
GCA_001521765.1	Elizabethkingia ursingii	d__Bacteria; p__Bacteroidetes; c__Flavobacteriia; o__Flavobacteriales; f__Flavobacteriaceae; g__Elizabethkingia; s__Elizabethkingia ursingii	d__Bacteria; p__Bacteroidota; c__Bacteroidia; o__Flavobacteriales; f__Weeksellaceae; g__Elizabethkingia; s__Elizabethkingia ursingii	yes	1756150	yes	no		no
GCA_000382425.1	Empedobacter brevis NBRC 14943 = ATCC 43319	d__Bacteria; p__Bacteroidetes; c__Flavobacteriia; o__Flavobacteriales; f__Flavobacteriaceae; g__Empedobacter; s__Empedobacter brevis	d__Bacteria; p__Bacteroidota; c__Bacteroidia; o__Flavobacteriales; f__Weeksellaceae; g__Empedobacter; s__Empedobacter brevis	no
GCA_003610695.1	Chryseobacterium arachidiradicis	d__Bacteria; p__Bacteroidetes; c__Flavobacteriia; o__Flavobacteriales; f__Flavobacteriaceae; g__Chryseobacterium; s__Chryseobacterium arachidiradicis	d__Bacteria; p__Bacteroidota; c__Bacteroidia; o__Flavobacteriales; f__Weeksellaceae; g__Epilithonimonas; s__Epilithonimonas arachidiradicis	yes	1617282	yes	no		no
GCA_900108115.1	Chryseobacterium bovis DSM 19482	d__Bacteria; p__Bacteroidetes; c__Flavobacteriia; o__Flavobacteriales; f__Flavobacteriaceae; g__Chryseobacterium; s__Chryseobacterium bovis	d__Bacteria; p__Bacteroidota; c__Bacteroidia; o__Flavobacteriales; f__Weeksellaceae; g__Epilithonimonas; s__Epilithonimonas bovis	yes	1121284	yes	no		no
GCA_000426465.1	Chryseobacterium caeni DSM 17710	d__Bacteria; p__Bacteroidetes; c__Flavobacteriia; o__Flavobacteriales; f__Flavobacteriaceae; g__Chryseobacterium; s__Chryseobacterium caeni	d__Bacteria; p__Bacteroidota; c__Bacteroidia; o__Flavobacteriales; f__Weeksellaceae; g__Epilithonimonas; s__Epilithonimonas caeni	no
GCA_900110605.1	Chryseobacterium halperniae	d__Bacteria; p__Bacteroidetes; c__Flavobacteriia; o__Flavobacteriales; f__Flavobacteriaceae; g__Chryseobacterium; s__Chryseobacterium halperniae	d__Bacteria; p__Bacteroidota; c__Bacteroidia; o__Flavobacteriales; f__Weeksellaceae; g__Epilithonimonas; s__Epilithonimonas halperniae	yes	421072	yes	no		no
GCA_003385395.1	Chryseobacterium hispanicum	d__Bacteria; p__Bacteroidetes; c__Flavobacteriia; o__Flavobacteriales; f__Flavobacteriaceae; g__Chryseobacterium; s__Chryseobacterium hispanicum	d__Bacteria; p__Bacteroidota; c__Bacteroidia; o__Flavobacteriales; f__Weeksellaceae; g__Epilithonimonas; s__Epilithonimonas hispanicum	yes	358687	yes	no		no
GCA_003730015.1	Chryseobacterium hominis	d__Bacteria; p__Bacteroidetes; c__Flavobacteriia; o__Flavobacteriales; f__Flavobacteriaceae; g__Chryseobacterium; s__Chryseobacterium hominis	d__Bacteria; p__Bacteroidota; c__Bacteroidia; o__Flavobacteriales; f__Weeksellaceae; g__Epilithonimonas; s__Epilithonimonas hominis	yes	420404	yes	no		no
GCA_900102265.1	Chryseobacterium hungaricum	d__Bacteria; p__Bacteroidetes; c__Flavobacteriia; o__Flavobacteriales; f__Flavobacteriaceae; g__Chryseobacterium; s__Chryseobacterium hungaricum	d__Bacteria; p__Bacteroidota; c__Bacteroidia; o__Flavobacteriales; f__Weeksellaceae; g__Epilithonimonas; s__Epilithonimonas hungaricum	yes	454006	yes	no		no
GCA_900142325.1	Chryseobacterium molle	d__Bacteria; p__Bacteroidetes; c__Flavobacteriia; o__Flavobacteriales; f__Flavobacteriaceae; g__Chryseobacterium; s__Chryseobacterium molle	d__Bacteria; p__Bacteroidota; c__Bacteroidia; o__Flavobacteriales; f__Weeksellaceae; g__Epilithonimonas; s__Epilithonimonas molle	yes	216903	yes	no		no
GCA_000428485.1	Chryseobacterium tenax DSM 16811	d__Bacteria; p__Bacteroidetes; c__Flavobacteriia; o__Flavobacteriales; f__Flavobacteriaceae; g__Chryseobacterium; s__Chryseobacterium tenax	d__Bacteria; p__Bacteroidota; c__Bacteroidia; o__Flavobacteriales; f__Weeksellaceae; g__Epilithonimonas; s__Epilithonimonas tenax	no
GCA_004365655.1	Chryseobacterium xixisoli	d__Bacteria; p__Bacteroidetes; c__Flavobacteriia; o__Flavobacteriales; f__Flavobacteriaceae; g__Chryseobacterium; s__Chryseobacterium xixisoli	d__Bacteria; p__Bacteroidota; c__Bacteroidia; o__Flavobacteriales; f__Weeksellaceae; g__Epilithonimonas; s__Epilithonimonas xixisoli	yes	1476462	yes	no		no
GCA_900141765.1	Chryseobacterium zeae	d__Bacteria; p__Bacteroidetes; c__Flavobacteriia; o__Flavobacteriales; f__Flavobacteriaceae; g__Chryseobacterium; s__Chryseobacterium zeae	d__Bacteria; p__Bacteroidota; c__Bacteroidia; o__Flavobacteriales; f__Weeksellaceae; g__Epilithonimonas; s__Epilithonimonas zeae	yes	1416779	yes	no		no
GCA_900109615.1	Chryseobacterium antarcticum	d__Bacteria; p__Bacteroidetes; c__Flavobacteriia; o__Flavobacteriales; f__Flavobacteriaceae; g__Chryseobacterium; s__Chryseobacterium antarcticum	d__Bacteria; p__Bacteroidota; c__Bacteroidia; o__Flavobacteriales; f__Weeksellaceae; g__Kaistella; s__Kaistella antarcticum	yes	266748	yes	no		no
GCA_900156725.1	Chryseobacterium chaponense	d__Bacteria; p__Bacteroidetes; c__Flavobacteriia; o__Flavobacteriales; f__Flavobacteriaceae; g__Chryseobacterium; s__Chryseobacterium chaponense	d__Bacteria; p__Bacteroidota; c__Bacteroidia; o__Flavobacteriales; f__Weeksellaceae; g__Kaistella; s__Kaistella chaponense	yes	713588	yes	no		no
GCA_900113805.1	Chryseobacterium frigidisoli	d__Bacteria; p__Bacteroidetes; c__Flavobacteriia; o__Flavobacteriales; f__Flavobacteriaceae; g__Chryseobacterium; s__Chryseobacterium frigidisoli	d__Bacteria; p__Bacteroidota; c__Bacteroidia; o__Flavobacteriales; f__Weeksellaceae; g__Kaistella; s__Kaistella frigidisoli	yes	1125876	yes	no		no
GCA_000735695.2	Chryseobacterium haifense DSM 19056	d__Bacteria; p__Bacteroidetes; c__Flavobacteriia; o__Flavobacteriales; f__Flavobacteriaceae; g__Chryseobacterium; s__Chryseobacterium haifense	d__Bacteria; p__Bacteroidota; c__Bacteroidia; o__Flavobacteriales; f__Weeksellaceae; g__Kaistella; s__Kaistella haifense	yes	1450526	yes	no		no
GCA_900108025.1	Chryseobacterium humi	d__Bacteria; p__Bacteroidetes; c__Flavobacteriia; o__Flavobacteriales; f__Flavobacteriaceae; g__Chryseobacterium; s__Chryseobacterium humi	d__Bacteria; p__Bacteroidota; c__Bacteroidia; o__Flavobacteriales; f__Weeksellaceae; g__Kaistella; s__Kaistella humi	yes	493375	yes	no		no
GCA_000812865.1	Chryseobacterium jeonii	d__Bacteria; p__Bacteroidetes; c__Flavobacteriia; o__Flavobacteriales; f__Flavobacteriaceae; g__Chryseobacterium; s__Chryseobacterium jeonii	d__Bacteria; p__Bacteroidota; c__Bacteroidia; o__Flavobacteriales; f__Weeksellaceae; g__Kaistella; s__Kaistella jeonii	yes	266749	yes	no		no
GCA_001045435.1	Chryseobacterium koreense CCUG 49689	d__Bacteria; p__Bacteroidetes; c__Flavobacteriia; o__Flavobacteriales; f__Flavobacteriaceae; g__Chryseobacterium; s__Chryseobacterium koreense	d__Bacteria; p__Bacteroidota; c__Bacteroidia; o__Flavobacteriales; f__Weeksellaceae; g__Kaistella; s__Kaistella koreense	yes	1304281	yes	no		no
GCA_000422265.1	Chryseobacterium palustre DSM 21579	d__Bacteria; p__Bacteroidetes; c__Flavobacteriia; o__Flavobacteriales; f__Flavobacteriaceae; g__Chryseobacterium; s__Chryseobacterium palustre	d__Bacteria; p__Bacteroidota; c__Bacteroidia; o__Flavobacteriales; f__Weeksellaceae; g__Kaistella; s__Kaistella palustre	no
GCA_000812875.1	Chryseobacterium solincola	d__Bacteria; p__Bacteroidetes; c__Flavobacteriia; o__Flavobacteriales; f__Flavobacteriaceae; g__Chryseobacterium; s__Chryseobacterium solincola	d__Bacteria; p__Bacteroidota; c__Bacteroidia; o__Flavobacteriales; f__Weeksellaceae; g__Kaistella; s__Kaistella solincola	yes	510955	yes	no		no
GCA_900114045.1	Chryseobacterium treverense	d__Bacteria; p__Bacteroidetes; c__Flavobacteriia; o__Flavobacteriales; f__Flavobacteriaceae; g__Chryseobacterium; s__Chryseobacterium treverense	d__Bacteria; p__Bacteroidota; c__Bacteroidia; o__Flavobacteriales; f__Weeksellaceae; g__Kaistella; s__Kaistella treverense	yes	631455	yes	no		no
GCA_900176425.1	Moheibacter sediminis	d__Bacteria; p__Bacteroidetes; c__Flavobacteriia; o__Flavobacteriales; f__Flavobacteriaceae; g__Moheibacter; s__Moheibacter sediminis	d__Bacteria; p__Bacteroidota; c__Bacteroidia; o__Flavobacteriales; f__Weeksellaceae; g__Moheibacter; s__Moheibacter sediminis	yes	1434700	yes	no		no
GCA_000265465.1	Ornithobacterium rhinotracheale DSM 15997	d__Bacteria; p__Bacteroidetes; c__Flavobacteriia; o__Flavobacteriales; f__Flavobacteriaceae; g__Ornithobacterium; s__Ornithobacterium rhinotracheale	d__Bacteria; p__Bacteroidota; c__Bacteroidia; o__Flavobacteriales; f__Weeksellaceae; g__Ornithobacterium; s__Ornithobacterium rhinotracheale	yes	867902	yes	no		no
GCA_900187185.1	Chryseobacterium taklimakanense	d__Bacteria; p__Bacteroidetes; c__Flavobacteriia; o__Flavobacteriales; f__Flavobacteriaceae; g__Chryseobacterium; s__Chryseobacterium taklimakanense	d__Bacteria; p__Bacteroidota; c__Bacteroidia; o__Flavobacteriales; f__Weeksellaceae; g__Planobacterium; s__Planobacterium taklimakanense	no
GCA_000252855.1	Riemerella anatipestifer ATCC 11845 = DSM 15868	d__Bacteria; p__Bacteroidetes; c__Flavobacteriia; o__Flavobacteriales; f__Flavobacteriaceae; g__Riemerella; s__Riemerella anatipestifer	d__Bacteria; p__Bacteroidota; c__Bacteroidia; o__Flavobacteriales; f__Weeksellaceae; g__Riemerella; s__Riemerella anatipestifer	yes	693978	yes	no		no
GCA_000374405.1	Riemerella columbina DSM 16469	d__Bacteria; p__Bacteroidetes; c__Flavobacteriia; o__Flavobacteriales; f__Flavobacteriaceae; g__Riemerella; s__Riemerella columbina	d__Bacteria; p__Bacteroidota; c__Bacteroidia; o__Flavobacteriales; f__Weeksellaceae; g__Riemerella; s__Riemerella columbina	no
GCA_900101995.1	Riemerella columbipharyngis	d__Bacteria; p__Bacteroidetes; c__Flavobacteriia; o__Flavobacteriales; f__Flavobacteriaceae; g__Riemerella; s__Riemerella columbipharyngis	d__Bacteria; p__Bacteroidota; c__Bacteroidia; o__Flavobacteriales; f__Weeksellaceae; g__Riemerella; s__Riemerella columbipharyngis	yes	1071918	yes	no		no
GCA_900167905.1	Soonwooa buanensis	d__Bacteria; p__Bacteroidetes; c__Flavobacteriia; o__Flavobacteriales; f__Flavobacteriaceae; g__Soonwooa; s__Soonwooa buanensis	d__Bacteria; p__Bacteroidota; c__Bacteroidia; o__Flavobacteriales; f__Weeksellaceae; g__Soonwooa; s__Soonwooa buanensis	yes	619805	yes	no		no
GCA_900089075.1	Vaginella massiliensis	d__Bacteria; p__Bacteroidetes; c__Flavobacteriia; o__Flavobacteriales; f__Flavobacteriaceae; g__Vaginella; s__Vaginella massiliensis	d__Bacteria; p__Bacteroidota; c__Bacteroidia; o__Flavobacteriales; f__Weeksellaceae; g__Vaginella; s__Vaginella massiliensis	no
GCA_000189415.1	Weeksella virosa DSM 16922	d__Bacteria; p__Bacteroidetes; c__Flavobacteriia; o__Flavobacteriales; f__Flavobacteriaceae; g__Weeksella; s__Weeksella virosa	d__Bacteria; p__Bacteroidota; c__Bacteroidia; o__Flavobacteriales; f__Weeksellaceae; g__Weeksella; s__Weeksella virosa	yes	865938	yes	yes	0.32	no
GCA_004346135.1	Anseongella ginsenosidimutans	d__Bacteria; p__Bacteroidetes; c__Sphingobacteriia; o__Sphingobacteriales; f__Sphingobacteriaceae; g__Anseongella; s__Anseongella ginsenosidimutans	d__Bacteria; p__Bacteroidota; c__Bacteroidia; o__Sphingobacteriales; f__Sphingobacteriaceae; g__Anseongella; s__Anseongella ginsenosidimutans	yes	496056	yes	yes	0.00012	yes
GCA_001730525.1	Arcticibacter eurypsychrophilus	d__Bacteria; p__Bacteroidetes; c__Sphingobacteriia; o__Sphingobacteriales; f__Sphingobacteriaceae; g__Arcticibacter; s__Arcticibacter eurypsychrophilus	d__Bacteria; p__Bacteroidota; c__Bacteroidia; o__Sphingobacteriales; f__Sphingobacteriaceae; g__Arcticibacter; s__Arcticibacter eurypsychrophilus	no
GCA_003002875.1	Arcticibacter pallidicorallinus	d__Bacteria; p__Bacteroidetes; c__Sphingobacteriia; o__Sphingobacteriales; f__Sphingobacteriaceae; g__Arcticibacter; s__Arcticibacter pallidicorallinus	d__Bacteria; p__Bacteroidota; c__Bacteroidia; o__Sphingobacteriales; f__Sphingobacteriaceae; g__Arcticibacter; s__Arcticibacter pallidicorallinus	yes	1259464	yes	yes	0.00054	yes
GCA_000403135.1	Arcticibacter svalbardensis MN12-7	d__Bacteria; p__Bacteroidetes; c__Sphingobacteriia; o__Sphingobacteriales; f__Sphingobacteriaceae; g__Arcticibacter; s__Arcticibacter svalbardensis	d__Bacteria; p__Bacteroidota; c__Bacteroidia; o__Sphingobacteriales; f__Sphingobacteriaceae; g__Arcticibacter; s__Arcticibacter svalbardensis	no
GCA_900168015.1	Pedobacter luteus	d__Bacteria; p__Bacteroidetes; c__Sphingobacteriia; o__Sphingobacteriales; f__Sphingobacteriaceae; g__Pedobacter; s__Pedobacter luteus	d__Bacteria; p__Bacteroidota; c__Bacteroidia; o__Sphingobacteriales; f__Sphingobacteriaceae; g__Daejeonella; s__Daejeonella luteus	yes	572036	yes	yes	0.00033	yes
GCA_000422945.1	Pedobacter oryzae DSM 19973	d__Bacteria; p__Bacteroidetes; c__Sphingobacteriia; o__Sphingobacteriales; f__Sphingobacteriaceae; g__Pedobacter; s__Pedobacter oryzae	d__Bacteria; p__Bacteroidota; c__Bacteroidia; o__Sphingobacteriales; f__Sphingobacteriaceae; g__Daejeonella; s__Daejeonella oryzae	no
GCA_900103545.1	Pedobacter ruber	d__Bacteria; p__Bacteroidetes; c__Sphingobacteriia; o__Sphingobacteriales; f__Sphingobacteriaceae; g__Pedobacter; s__Pedobacter ruber	d__Bacteria; p__Bacteroidota; c__Bacteroidia; o__Sphingobacteriales; f__Sphingobacteriaceae; g__Daejeonella; s__Daejeonella ruber	yes	990371	yes	yes	0.0004	yes
GCA_002797815.1	Mucilaginibacter auburnensis	d__Bacteria; p__Bacteroidetes; c__Sphingobacteriia; o__Sphingobacteriales; f__Sphingobacteriaceae; g__Mucilaginibacter; s__Mucilaginibacter auburnensis	d__Bacteria; p__Bacteroidota; c__Bacteroidia; o__Sphingobacteriales; f__Sphingobacteriaceae; g__Mucilaginibacter; s__Mucilaginibacter auburnensis	yes	1457233	yes	yes	0.00014	yes
GCA_900110105.1	Mucilaginibacter gossypiicola	d__Bacteria; p__Bacteroidetes; c__Sphingobacteriia; o__Sphingobacteriales; f__Sphingobacteriaceae; g__Mucilaginibacter; s__Mucilaginibacter gossypiicola	d__Bacteria; p__Bacteroidota; c__Bacteroidia; o__Sphingobacteriales; f__Sphingobacteriaceae; g__Mucilaginibacter; s__Mucilaginibacter gossypiicola	yes	551995	yes	yes	0.0005	yes
GCA_900100945.1	Mucilaginibacter gossypii	d__Bacteria; p__Bacteroidetes; c__Sphingobacteriia; o__Sphingobacteriales; f__Sphingobacteriaceae; g__Mucilaginibacter; s__Mucilaginibacter gossypii	d__Bacteria; p__Bacteroidota; c__Bacteroidia; o__Sphingobacteriales; f__Sphingobacteriaceae; g__Mucilaginibacter; s__Mucilaginibacter gossypii	yes	551996	yes	yes	0.0005	yes
GCA_002355435.1	Mucilaginibacter gotjawali	d__Bacteria; p__Bacteroidetes; c__Sphingobacteriia; o__Sphingobacteriales; f__Sphingobacteriaceae; g__Mucilaginibacter; s__Mucilaginibacter gotjawali	d__Bacteria; p__Bacteroidota; c__Bacteroidia; o__Sphingobacteriales; f__Sphingobacteriaceae; g__Mucilaginibacter; s__Mucilaginibacter gotjawali	yes	1550579	yes	yes	4.4e-05	yes
GCA_003633615.1	Mucilaginibacter gracilis	d__Bacteria; p__Bacteroidetes; c__Sphingobacteriia; o__Sphingobacteriales; f__Sphingobacteriaceae; g__Mucilaginibacter; s__Mucilaginibacter gracilis	d__Bacteria; p__Bacteroidota; c__Bacteroidia; o__Sphingobacteriales; f__Sphingobacteriaceae; g__Mucilaginibacter; s__Mucilaginibacter gracilis	yes	423350	yes	yes	0.00038	yes
GCA_003675385.1	Mucilaginibacter kameinonensis	d__Bacteria; p__Bacteroidetes; c__Sphingobacteriia; o__Sphingobacteriales; f__Sphingobacteriaceae; g__Mucilaginibacter; s__Mucilaginibacter kameinonensis	d__Bacteria; p__Bacteroidota; c__Bacteroidia; o__Sphingobacteriales; f__Sphingobacteriaceae; g__Mucilaginibacter; s__Mucilaginibacter kameinonensis	no
GCA_900155965.1	Mucilaginibacter lappiensis	d__Bacteria; p__Bacteroidetes; c__Sphingobacteriia; o__Sphingobacteriales; f__Sphingobacteriaceae; g__Mucilaginibacter; s__Mucilaginibacter lappiensis	d__Bacteria; p__Bacteroidota; c__Bacteroidia; o__Sphingobacteriales; f__Sphingobacteriaceae; g__Mucilaginibacter; s__Mucilaginibacter lappiensis	yes	354630	yes	yes	0.00058	yes
GCA_900105165.1	Mucilaginibacter mallensis	d__Bacteria; p__Bacteroidetes; c__Sphingobacteriia; o__Sphingobacteriales; f__Sphingobacteriaceae; g__Mucilaginibacter; s__Mucilaginibacter mallensis	d__Bacteria; p__Bacteroidota; c__Bacteroidia; o__Sphingobacteriales; f__Sphingobacteriaceae; g__Mucilaginibacter; s__Mucilaginibacter mallensis	yes	652787	yes	yes	0.00018	yes
GCA_003148845.1	Mucilaginibacter oryzae	d__Bacteria; p__Bacteroidetes; c__Sphingobacteriia; o__Sphingobacteriales; f__Sphingobacteriaceae; g__Mucilaginibacter; s__Mucilaginibacter oryzae	d__Bacteria; p__Bacteroidota; c__Bacteroidia; o__Sphingobacteriales; f__Sphingobacteriaceae; g__Mucilaginibacter; s__Mucilaginibacter oryzae	yes	468058	yes	yes	0.00097	yes
GCA_000166195.3	Mucilaginibacter paludis DSM 18603	d__Bacteria; p__Bacteroidetes; c__Sphingobacteriia; o__Sphingobacteriales; f__Sphingobacteriaceae; g__Mucilaginibacter; s__Mucilaginibacter paludis	d__Bacteria; p__Bacteroidota; c__Bacteroidia; o__Sphingobacteriales; f__Sphingobacteriaceae; g__Mucilaginibacter; s__Mucilaginibacter paludis	yes	714943	yes	yes	0.00038	yes
GCA_002013915.1	Mucilaginibacter pedocola	d__Bacteria; p__Bacteroidetes; c__Sphingobacteriia; o__Sphingobacteriales; f__Sphingobacteriaceae; g__Mucilaginibacter; s__Mucilaginibacter pedocola	d__Bacteria; p__Bacteroidota; c__Bacteroidia; o__Sphingobacteriales; f__Sphingobacteriaceae; g__Mucilaginibacter; s__Mucilaginibacter pedocola	yes	1792845	yes	yes	0.00061	yes
GCA_900101875.1	Mucilaginibacter pineti	d__Bacteria; p__Bacteroidetes; c__Sphingobacteriia; o__Sphingobacteriales; f__Sphingobacteriaceae; g__Mucilaginibacter; s__Mucilaginibacter pineti	d__Bacteria; p__Bacteroidota; c__Bacteroidia; o__Sphingobacteriales; f__Sphingobacteriaceae; g__Mucilaginibacter; s__Mucilaginibacter pineti	yes	1391627	yes	yes	0.00018	yes
GCA_001911425.1	Mucilaginibacter polytrichastri	d__Bacteria; p__Bacteroidetes; c__Sphingobacteriia; o__Sphingobacteriales; f__Sphingobacteriaceae; g__Mucilaginibacter; s__Mucilaginibacter polytrichastri	d__Bacteria; p__Bacteroidota; c__Bacteroidia; o__Sphingobacteriales; f__Sphingobacteriaceae; g__Mucilaginibacter; s__Mucilaginibacter polytrichastri	yes	1302689	yes	yes	0.00019	yes
GCA_004519315.1	Mucilaginibacter psychrotolerans	d__Bacteria; p__Bacteroidetes; c__Sphingobacteriia; o__Sphingobacteriales; f__Sphingobacteriaceae; g__Mucilaginibacter; s__Mucilaginibacter psychrotolerans	d__Bacteria; p__Bacteroidota; c__Bacteroidia; o__Sphingobacteriales; f__Sphingobacteriaceae; g__Mucilaginibacter; s__Mucilaginibacter psychrotolerans	yes	1524096	yes	yes	0.0011	yes
GCA_003050755.1	Mucilaginibacter yixingensis	d__Bacteria; p__Bacteroidetes; c__Sphingobacteriia; o__Sphingobacteriales; f__Sphingobacteriaceae; g__Mucilaginibacter; s__Mucilaginibacter yixingensis	d__Bacteria; p__Bacteroidota; c__Bacteroidia; o__Sphingobacteriales; f__Sphingobacteriaceae; g__Mucilaginibacter; s__Mucilaginibacter yixingensis	yes	1295612	yes	yes	0.0007	yes
GCA_000427965.1	Olivibacter sitiensis DSM 17696	d__Bacteria; p__Bacteroidetes; c__Sphingobacteriia; o__Sphingobacteriales; f__Sphingobacteriaceae; g__Olivibacter; s__Olivibacter sitiensis	d__Bacteria; p__Bacteroidota; c__Bacteroidia; o__Sphingobacteriales; f__Sphingobacteriaceae; g__Olivibacter; s__Olivibacter sitiensis	no
GCA_900112315.1	Parapedobacter composti	d__Bacteria; p__Bacteroidetes; c__Sphingobacteriia; o__Sphingobacteriales; f__Sphingobacteriaceae; g__Parapedobacter; s__Parapedobacter composti	d__Bacteria; p__Bacteroidota; c__Bacteroidia; o__Sphingobacteriales; f__Sphingobacteriaceae; g__Parapedobacter; s__Parapedobacter composti	yes	623281	yes	yes	0.00026	yes
GCA_900113765.1	Parapedobacter indicus	d__Bacteria; p__Bacteroidetes; c__Sphingobacteriia; o__Sphingobacteriales; f__Sphingobacteriaceae; g__Parapedobacter; s__Parapedobacter indicus	d__Bacteria; p__Bacteroidota; c__Bacteroidia; o__Sphingobacteriales; f__Sphingobacteriaceae; g__Parapedobacter; s__Parapedobacter indicus	yes	1477437	yes	yes	7.6e-05	yes
GCA_900109365.1	Parapedobacter koreensis	d__Bacteria; p__Bacteroidetes; c__Sphingobacteriia; o__Sphingobacteriales; f__Sphingobacteriaceae; g__Parapedobacter; s__Parapedobacter koreensis	d__Bacteria; p__Bacteroidota; c__Bacteroidia; o__Sphingobacteriales; f__Sphingobacteriaceae; g__Parapedobacter; s__Parapedobacter koreensis	yes	332977	yes	yes	5.2e-05	yes
GCA_900168055.1	Parapedobacter luteus	d__Bacteria; p__Bacteroidetes; c__Sphingobacteriia; o__Sphingobacteriales; f__Sphingobacteriaceae; g__Parapedobacter; s__Parapedobacter luteus	d__Bacteria; p__Bacteroidota; c__Bacteroidia; o__Sphingobacteriales; f__Sphingobacteriaceae; g__Parapedobacter; s__Parapedobacter luteus	yes	623280	yes	yes	0.00026	yes
GCA_004339765.1	Pedobacter bauzanensis	d__Bacteria; p__Bacteroidetes; c__Sphingobacteriia; o__Sphingobacteriales; f__Sphingobacteriaceae; g__Pedobacter; s__Pedobacter bauzanensis	d__Bacteria; p__Bacteroidota; c__Bacteroidia; o__Sphingobacteriales; f__Sphingobacteriaceae; g__Pedobacter_B; s__Pedobacter_B bauzanensis	yes	653929	yes	yes	7.4e-05	yes
GCA_006716645.1	Pedobacter tournemirensis	d__Bacteria; p__Bacteroidetes; c__Sphingobacteriia; o__Sphingobacteriales; f__Sphingobacteriaceae; g__Pedobacter; s__Pedobacter tournemirensis	d__Bacteria; p__Bacteroidota; c__Bacteroidia; o__Sphingobacteriales; f__Sphingobacteriaceae; g__Pedobacter_C; s__Pedobacter_C tournemirensis	yes	699437	yes	yes	0.00054	yes
GCA_900176535.1	Pedobacter africanus	d__Bacteria; p__Bacteroidetes; c__Sphingobacteriia; o__Sphingobacteriales; f__Sphingobacteriaceae; g__Pedobacter; s__Pedobacter africanus	d__Bacteria; p__Bacteroidota; c__Bacteroidia; o__Sphingobacteriales; f__Sphingobacteriaceae; g__Pedobacter; s__Pedobacter africanus	yes	151894	yes	yes	6.2e-05	yes
GCA_000258495.1	Pedobacter agri PB92	d__Bacteria; p__Bacteroidetes; c__Sphingobacteriia; o__Sphingobacteriales; f__Sphingobacteriaceae; g__Pedobacter; s__Pedobacter agri	d__Bacteria; p__Bacteroidota; c__Bacteroidia; o__Sphingobacteriales; f__Sphingobacteriaceae; g__Pedobacter; s__Pedobacter agri	no
GCA_003664035.1	Pedobacter alluvionis	d__Bacteria; p__Bacteroidetes; c__Sphingobacteriia; o__Sphingobacteriales; f__Sphingobacteriaceae; g__Pedobacter; s__Pedobacter alluvionis	d__Bacteria; p__Bacteroidota; c__Bacteroidia; o__Sphingobacteriales; f__Sphingobacteriaceae; g__Pedobacter; s__Pedobacter alluvionis	yes	475253	yes	yes	2.4e-05	yes
GCA_900112985.1	Pedobacter antarcticus	d__Bacteria; p__Bacteroidetes; c__Sphingobacteriia; o__Sphingobacteriales; f__Sphingobacteriaceae; g__Pedobacter; s__Pedobacter antarcticus	d__Bacteria; p__Bacteroidota; c__Bacteroidia; o__Sphingobacteriales; f__Sphingobacteriaceae; g__Pedobacter; s__Pedobacter antarcticus	yes	34086	yes	yes	2.4e-05	yes
GCA_000708285.2	Pedobacter borealis DSM 19626	d__Bacteria; p__Bacteroidetes; c__Sphingobacteriia; o__Sphingobacteriales; f__Sphingobacteriaceae; g__Pedobacter; s__Pedobacter borealis	d__Bacteria; p__Bacteroidota; c__Bacteroidia; o__Sphingobacteriales; f__Sphingobacteriaceae; g__Pedobacter; s__Pedobacter borealis	no
GCA_900129215.1	Pedobacter caeni	d__Bacteria; p__Bacteroidetes; c__Sphingobacteriia; o__Sphingobacteriales; f__Sphingobacteriaceae; g__Pedobacter; s__Pedobacter caeni	d__Bacteria; p__Bacteroidota; c__Bacteroidia; o__Sphingobacteriales; f__Sphingobacteriaceae; g__Pedobacter; s__Pedobacter caeni	yes	288992	yes	yes	0.00028	yes
GCA_003313385.1	Pedobacter chitinilyticus	d__Bacteria; p__Bacteroidetes; c__Sphingobacteriia; o__Sphingobacteriales; f__Sphingobacteriaceae; g__Pedobacter; s__Pedobacter chitinilyticus	d__Bacteria; p__Bacteroidota; c__Bacteroidia; o__Sphingobacteriales; f__Sphingobacteriaceae; g__Pedobacter; s__Pedobacter chitinilyticus	no
GCA_003259615.1	Pedobacter cryoconitis	d__Bacteria; p__Bacteroidetes; c__Sphingobacteriia; o__Sphingobacteriales; f__Sphingobacteriaceae; g__Pedobacter; s__Pedobacter cryoconitis	d__Bacteria; p__Bacteroidota; c__Bacteroidia; o__Sphingobacteriales; f__Sphingobacteriaceae; g__Pedobacter; s__Pedobacter cryoconitis	yes	188932	yes	yes	0.00028	yes
GCA_004362245.1	Pedobacter duraquae	d__Bacteria; p__Bacteroidetes; c__Sphingobacteriia; o__Sphingobacteriales; f__Sphingobacteriaceae; g__Pedobacter; s__Pedobacter duraquae	d__Bacteria; p__Bacteroidota; c__Bacteroidia; o__Sphingobacteriales; f__Sphingobacteriaceae; g__Pedobacter; s__Pedobacter duraquae	yes	425511	yes	yes	0.00078	yes
GCA_001442625.1	Pedobacter ginsenosidimutans	d__Bacteria; p__Bacteroidetes; c__Sphingobacteriia; o__Sphingobacteriales; f__Sphingobacteriaceae; g__Pedobacter; s__Pedobacter ginsenosidimutans	d__Bacteria; p__Bacteroidota; c__Bacteroidia; o__Sphingobacteriales; f__Sphingobacteriaceae; g__Pedobacter; s__Pedobacter ginsenosidimutans	yes	687842	yes	yes	0.00011	yes
GCA_900107535.1	Pedobacter hartonius	d__Bacteria; p__Bacteroidetes; c__Sphingobacteriia; o__Sphingobacteriales; f__Sphingobacteriaceae; g__Pedobacter; s__Pedobacter hartonius	d__Bacteria; p__Bacteroidota; c__Bacteroidia; o__Sphingobacteriales; f__Sphingobacteriaceae; g__Pedobacter; s__Pedobacter hartonius	yes	425514	yes	yes	0.00028	yes
GCA_000023825.1	Pedobacter heparinus DSM 2366	d__Bacteria; p__Bacteroidetes; c__Sphingobacteriia; o__Sphingobacteriales; f__Sphingobacteriaceae; g__Pedobacter; s__Pedobacter heparinus	d__Bacteria; p__Bacteroidota; c__Bacteroidia; o__Sphingobacteriales; f__Sphingobacteriaceae; g__Pedobacter; s__Pedobacter heparinus	yes	485917	yes	yes	5e-05	yes
GCA_900113525.1	Pedobacter insulae	d__Bacteria; p__Bacteroidetes; c__Sphingobacteriia; o__Sphingobacteriales; f__Sphingobacteriaceae; g__Pedobacter; s__Pedobacter insulae	d__Bacteria; p__Bacteroidota; c__Bacteroidia; o__Sphingobacteriales; f__Sphingobacteriaceae; g__Pedobacter; s__Pedobacter insulae	yes	414048	yes	yes	1.8e-06	yes
GCA_004310665.1	Pedobacter kyonggii	d__Bacteria; p__Bacteroidetes; c__Sphingobacteriia; o__Sphingobacteriales; f__Sphingobacteriaceae; g__Pedobacter; s__Pedobacter kyonggii	d__Bacteria; p__Bacteroidota; c__Bacteroidia; o__Sphingobacteriales; f__Sphingobacteriaceae; g__Pedobacter; s__Pedobacter kyonggii	yes	1926871	yes	yes	3.2e-05	yes
GCA_000812965.1	Pedobacter kyungheensis	d__Bacteria; p__Bacteroidetes; c__Sphingobacteriia; o__Sphingobacteriales; f__Sphingobacteriaceae; g__Pedobacter; s__Pedobacter kyungheensis	d__Bacteria; p__Bacteroidota; c__Bacteroidia; o__Sphingobacteriales; f__Sphingobacteriaceae; g__Pedobacter; s__Pedobacter kyungheensis	yes	1069985	yes	yes	1.3e-05	yes
GCA_000832545.1	Pedobacter lusitanus	d__Bacteria; p__Bacteroidetes; c__Sphingobacteriia; o__Sphingobacteriales; f__Sphingobacteriaceae; g__Pedobacter; s__Pedobacter lusitanus	d__Bacteria; p__Bacteroidota; c__Bacteroidia; o__Sphingobacteriales; f__Sphingobacteriaceae; g__Pedobacter; s__Pedobacter lusitanus	yes	1503925	yes	yes	0.00028	yes
GCA_004362715.1	Pedobacter metabolipauper	d__Bacteria; p__Bacteroidetes; c__Sphingobacteriia; o__Sphingobacteriales; f__Sphingobacteriaceae; g__Pedobacter; s__Pedobacter metabolipauper	d__Bacteria; p__Bacteroidota; c__Bacteroidia; o__Sphingobacteriales; f__Sphingobacteriaceae; g__Pedobacter; s__Pedobacter metabolipauper	yes	425513	yes	yes	0.00028	yes
GCA_003313325.1	Pedobacter namyangjuensis	d__Bacteria; p__Bacteroidetes; c__Sphingobacteriia; o__Sphingobacteriales; f__Sphingobacteriaceae; g__Pedobacter; s__Pedobacter namyangjuensis	d__Bacteria; p__Bacteroidota; c__Bacteroidia; o__Sphingobacteriales; f__Sphingobacteriaceae; g__Pedobacter; s__Pedobacter namyangjuensis	no
GCA_003313505.1	Pedobacter nanyangensis	d__Bacteria; p__Bacteroidetes; c__Sphingobacteriia; o__Sphingobacteriales; f__Sphingobacteriaceae; g__Pedobacter; s__Pedobacter nanyangensis	d__Bacteria; p__Bacteroidota; c__Bacteroidia; o__Sphingobacteriales; f__Sphingobacteriaceae; g__Pedobacter; s__Pedobacter nanyangensis	no
GCA_003208655.1	Pedobacter nutrimenti	d__Bacteria; p__Bacteroidetes; c__Sphingobacteriia; o__Sphingobacteriales; f__Sphingobacteriaceae; g__Pedobacter; s__Pedobacter nutrimenti	d__Bacteria; p__Bacteroidota; c__Bacteroidia; o__Sphingobacteriales; f__Sphingobacteriaceae; g__Pedobacter; s__Pedobacter nutrimenti	yes	1241337	yes	yes	8.1e-05	yes
GCA_900176505.1	Pedobacter nyackensis	d__Bacteria; p__Bacteroidetes; c__Sphingobacteriia; o__Sphingobacteriales; f__Sphingobacteriaceae; g__Pedobacter; s__Pedobacter nyackensis	d__Bacteria; p__Bacteroidota; c__Bacteroidia; o__Sphingobacteriales; f__Sphingobacteriaceae; g__Pedobacter; s__Pedobacter nyackensis	yes	475255	yes	yes	6.5e-05	yes
GCA_004340665.1	Pedobacter psychrotolerans	d__Bacteria; p__Bacteroidetes; c__Sphingobacteriia; o__Sphingobacteriales; f__Sphingobacteriaceae; g__Pedobacter; s__Pedobacter psychrotolerans	d__Bacteria; p__Bacteroidota; c__Bacteroidia; o__Sphingobacteriales; f__Sphingobacteriaceae; g__Pedobacter; s__Pedobacter psychrotolerans	yes	1843235	yes	yes	0.0012	yes
GCA_900111155.1	Pedobacter rhizosphaerae	d__Bacteria; p__Bacteroidetes; c__Sphingobacteriia; o__Sphingobacteriales; f__Sphingobacteriaceae; g__Pedobacter; s__Pedobacter rhizosphaerae	d__Bacteria; p__Bacteroidota; c__Bacteroidia; o__Sphingobacteriales; f__Sphingobacteriaceae; g__Pedobacter; s__Pedobacter rhizosphaerae	yes	390241	yes	yes	2.7e-05	yes
GCA_900101435.1	Pedobacter soli	d__Bacteria; p__Bacteroidetes; c__Sphingobacteriia; o__Sphingobacteriales; f__Sphingobacteriaceae; g__Pedobacter; s__Pedobacter soli	d__Bacteria; p__Bacteroidota; c__Bacteroidia; o__Sphingobacteriales; f__Sphingobacteriaceae; g__Pedobacter; s__Pedobacter soli	yes	390242	yes	yes	1.3e-05	yes
GCA_900103665.1	Pedobacter steynii	d__Bacteria; p__Bacteroidetes; c__Sphingobacteriia; o__Sphingobacteriales; f__Sphingobacteriaceae; g__Pedobacter; s__Pedobacter steynii	d__Bacteria; p__Bacteroidota; c__Bacteroidia; o__Sphingobacteriales; f__Sphingobacteriaceae; g__Pedobacter; s__Pedobacter steynii	yes	430522	yes	yes	0.00028	yes
GCA_900111825.1	Pedobacter suwonensis	d__Bacteria; p__Bacteroidetes; c__Sphingobacteriia; o__Sphingobacteriales; f__Sphingobacteriaceae; g__Pedobacter; s__Pedobacter suwonensis	d__Bacteria; p__Bacteroidota; c__Bacteroidia; o__Sphingobacteriales; f__Sphingobacteriaceae; g__Pedobacter; s__Pedobacter suwonensis	yes	332999	yes	yes	1.3e-05	yes
GCA_900100705.1	Pedobacter terrae	d__Bacteria; p__Bacteroidetes; c__Sphingobacteriia; o__Sphingobacteriales; f__Sphingobacteriaceae; g__Pedobacter; s__Pedobacter terrae	d__Bacteria; p__Bacteroidota; c__Bacteroidia; o__Sphingobacteriales; f__Sphingobacteriaceae; g__Pedobacter; s__Pedobacter terrae	yes	405671	yes	yes	2.6e-05	yes
GCA_005925345.1	Pedobacter ureilyticus	d__Bacteria; p__Bacteroidetes; c__Sphingobacteriia; o__Sphingobacteriales; f__Sphingobacteriaceae; g__Pedobacter; s__Pedobacter ureilyticus	d__Bacteria; p__Bacteroidota; c__Bacteroidia; o__Sphingobacteriales; f__Sphingobacteriaceae; g__Pedobacter; s__Pedobacter ureilyticus	no
GCA_900182595.1	Pedobacter westerhofensis	d__Bacteria; p__Bacteroidetes; c__Sphingobacteriia; o__Sphingobacteriales; f__Sphingobacteriaceae; g__Pedobacter; s__Pedobacter westerhofensis	d__Bacteria; p__Bacteroidota; c__Bacteroidia; o__Sphingobacteriales; f__Sphingobacteriaceae; g__Pedobacter; s__Pedobacter westerhofensis	yes	425512	yes	yes	0.00028	yes
GCA_900215335.1	Pedobacter xixiisoli	d__Bacteria; p__Bacteroidetes; c__Sphingobacteriia; o__Sphingobacteriales; f__Sphingobacteriaceae; g__Pedobacter; s__Pedobacter xixiisoli	d__Bacteria; p__Bacteroidota; c__Bacteroidia; o__Sphingobacteriales; f__Sphingobacteriaceae; g__Pedobacter; s__Pedobacter xixiisoli	yes	1476464	yes	yes	2.6e-06	yes
GCA_003173595.1	Pedobacter yonginense	d__Bacteria; p__Bacteroidetes; c__Sphingobacteriia; o__Sphingobacteriales; f__Sphingobacteriaceae; g__Pedobacter; s__Pedobacter yonginense	d__Bacteria; p__Bacteroidota; c__Bacteroidia; o__Sphingobacteriales; f__Sphingobacteriaceae; g__Pedobacter; s__Pedobacter yonginense	yes	651869	yes	yes	3.6e-05	yes
GCA_003029735.1	Pedobacter yulinensis	d__Bacteria; p__Bacteroidetes; c__Sphingobacteriia; o__Sphingobacteriales; f__Sphingobacteriaceae; g__Pedobacter; s__Pedobacter yulinensis	d__Bacteria; p__Bacteroidota; c__Bacteroidia; o__Sphingobacteriales; f__Sphingobacteriaceae; g__Pedobacter; s__Pedobacter yulinensis	yes	2126353	yes	yes	8.4e-05	yes
GCA_003313335.1	Nubsella zeaxanthinifaciens	d__Bacteria; p__Bacteroidetes; c__Sphingobacteriia; o__Sphingobacteriales; f__Sphingobacteriaceae; g__Nubsella; s__Nubsella zeaxanthinifaciens	d__Bacteria; p__Bacteroidota; c__Bacteroidia; o__Sphingobacteriales; f__Sphingobacteriaceae; g__Pedobacter; s__Pedobacter zeaxanthinifaciens	no
GCA_000302595.1	Pedobacter arcticus A12	d__Bacteria; p__Bacteroidetes; c__Sphingobacteriia; o__Sphingobacteriales; f__Sphingobacteriaceae; g__Pedobacter; s__Pedobacter arcticus	d__Bacteria; p__Bacteroidota; c__Bacteroidia; o__Sphingobacteriales; f__Sphingobacteriaceae; g__Pelobium; s__Pelobium arcticus	no
GCA_003609575.1	Pelobium manganitolerans	d__Bacteria; p__Bacteroidetes; c__Sphingobacteriia; o__Sphingobacteriales; f__Sphingobacteriaceae; g__Pelobium; s__Pelobium manganitolerans	d__Bacteria; p__Bacteroidota; c__Bacteroidia; o__Sphingobacteriales; f__Sphingobacteriaceae; g__Pelobium; s__Pelobium manganitolerans	yes	1842495	yes	yes	4.9e-05	yes
GCA_001652725.1	Pedobacter psychrophilus	d__Bacteria; p__Bacteroidetes; c__Sphingobacteriia; o__Sphingobacteriales; f__Sphingobacteriaceae; g__Pedobacter; s__Pedobacter psychrophilus	d__Bacteria; p__Bacteroidota; c__Bacteroidia; o__Sphingobacteriales; f__Sphingobacteriaceae; g__Pelobium; s__Pelobium psychrophilus	yes	1826909	yes	yes	0.00051	yes
GCA_000425145.1	Pedobacter glucosidilyticus DSM 23534	d__Bacteria; p__Bacteroidetes; c__Sphingobacteriia; o__Sphingobacteriales; f__Sphingobacteriaceae; g__Pedobacter; s__Pedobacter glucosidilyticus	d__Bacteria; p__Bacteroidota; c__Bacteroidia; o__Sphingobacteriales; f__Sphingobacteriaceae; g__Pseudopedobacter; s__Pseudopedobacter glucosidilyticus	no
GCA_000190735.2	Pseudopedobacter saltans DSM 12145	d__Bacteria; p__Bacteroidetes; c__Sphingobacteriia; o__Sphingobacteriales; f__Sphingobacteriaceae; g__Pseudopedobacter; s__Pseudopedobacter saltans	d__Bacteria; p__Bacteroidota; c__Bacteroidia; o__Sphingobacteriales; f__Sphingobacteriaceae; g__Pseudopedobacter; s__Pseudopedobacter saltans	yes	762903	yes	yes	2.9e-06	yes
GCA_900109575.1	Pseudosphingobacterium domesticum	d__Bacteria; p__Bacteroidetes; c__Sphingobacteriia; o__Sphingobacteriales; f__Sphingobacteriaceae; g__Pseudosphingobacterium; s__Pseudosphingobacterium domesticum	d__Bacteria; p__Bacteroidota; c__Bacteroidia; o__Sphingobacteriales; f__Sphingobacteriaceae; g__Pseudosphingobacterium; s__Pseudosphingobacterium domesticum	yes	407022	yes	yes	0.0019	yes
GCA_000242635.3	Solitalea canadensis DSM 3403	d__Bacteria; p__Bacteroidetes; c__Sphingobacteriia; o__Sphingobacteriales; f__Sphingobacteriaceae; g__Solitalea; s__Solitalea canadensis	d__Bacteria; p__Bacteroidota; c__Bacteroidia; o__Sphingobacteriales; f__Sphingobacteriaceae; g__Solitalea; s__Solitalea canadensis	yes	929556	yes	yes	0.00033	yes
GCA_900182575.1	Solitalea koreensis	d__Bacteria; p__Bacteroidetes; c__Sphingobacteriia; o__Sphingobacteriales; f__Sphingobacteriaceae; g__Solitalea; s__Solitalea koreensis	d__Bacteria; p__Bacteroidota; c__Bacteroidia; o__Sphingobacteriales; f__Sphingobacteriaceae; g__Solitalea; s__Solitalea koreensis	yes	543615	yes	yes	0.00033	yes
GCA_002920915.1	Solitalea longa	d__Bacteria; p__Bacteroidetes; c__Sphingobacteriia; o__Sphingobacteriales; f__Sphingobacteriaceae; g__Solitalea; s__Solitalea longa	d__Bacteria; p__Bacteroidota; c__Bacteroidia; o__Sphingobacteriales; f__Sphingobacteriaceae; g__Solitalea; s__Solitalea longa	yes	2079460	yes	yes	4.7e-05	yes
GCA_004342685.1	Sphingobacterium alimentarium	d__Bacteria; p__Bacteroidetes; c__Sphingobacteriia; o__Sphingobacteriales; f__Sphingobacteriaceae; g__Sphingobacterium; s__Sphingobacterium alimentarium	d__Bacteria; p__Bacteroidota; c__Bacteroidia; o__Sphingobacteriales; f__Sphingobacteriaceae; g__Sphingobacterium; s__Sphingobacterium alimentarium	yes	797292	yes	yes	0.00028	yes
GCA_005049105.1	Sphingobacterium alkalisoli	d__Bacteria; p__Bacteroidetes; c__Sphingobacteriia; o__Sphingobacteriales; f__Sphingobacteriaceae; g__Sphingobacterium; s__Sphingobacterium alkalisoli	d__Bacteria; p__Bacteroidota; c__Bacteroidia; o__Sphingobacteriales; f__Sphingobacteriaceae; g__Sphingobacterium; s__Sphingobacterium alkalisoli	yes	1874115	yes	yes	0.00021	yes
GCA_002245855.1	Sphingobacterium cellulitidis	d__Bacteria; p__Bacteroidetes; c__Sphingobacteriia; o__Sphingobacteriales; f__Sphingobacteriaceae; g__Sphingobacterium; s__Sphingobacterium cellulitidis	d__Bacteria; p__Bacteroidota; c__Bacteroidia; o__Sphingobacteriales; f__Sphingobacteriaceae; g__Sphingobacterium; s__Sphingobacterium cellulitidis	yes	1768011	yes	yes	0.00012	yes
GCA_000757725.1	Sphingobacterium deserti	d__Bacteria; p__Bacteroidetes; c__Sphingobacteriia; o__Sphingobacteriales; f__Sphingobacteriaceae; g__Sphingobacterium; s__Sphingobacterium deserti	d__Bacteria; p__Bacteroidota; c__Bacteroidia; o__Sphingobacteriales; f__Sphingobacteriaceae; g__Sphingobacterium; s__Sphingobacterium deserti	yes	1229276	yes	yes	6.4e-05	yes
GCA_003610355.1	Sphingobacterium detergens	d__Bacteria; p__Bacteroidetes; c__Sphingobacteriia; o__Sphingobacteriales; f__Sphingobacteriaceae; g__Sphingobacterium; s__Sphingobacterium detergens	d__Bacteria; p__Bacteroidota; c__Bacteroidia; o__Sphingobacteriales; f__Sphingobacteriaceae; g__Sphingobacterium; s__Sphingobacterium detergens	yes	1145106	yes	yes	5.1e-05	yes
GCA_003054045.1	Sphingobacterium faecium	d__Bacteria; p__Bacteroidetes; c__Sphingobacteriia; o__Sphingobacteriales; f__Sphingobacteriaceae; g__Sphingobacterium; s__Sphingobacterium faecium	d__Bacteria; p__Bacteroidota; c__Bacteroidia; o__Sphingobacteriales; f__Sphingobacteriaceae; g__Sphingobacterium; s__Sphingobacterium faecium	yes	34087	yes	yes	0.00027	yes
GCA_002980575.1	Sphingobacterium gobiense	d__Bacteria; p__Bacteroidetes; c__Sphingobacteriia; o__Sphingobacteriales; f__Sphingobacteriaceae; g__Sphingobacterium; s__Sphingobacterium gobiense	d__Bacteria; p__Bacteroidota; c__Bacteroidia; o__Sphingobacteriales; f__Sphingobacteriaceae; g__Sphingobacterium; s__Sphingobacterium gobiense	yes	1382456	yes	yes	5.6e-05	yes
GCA_002980525.1	Sphingobacterium haloxyli	d__Bacteria; p__Bacteroidetes; c__Sphingobacteriia; o__Sphingobacteriales; f__Sphingobacteriaceae; g__Sphingobacterium; s__Sphingobacterium haloxyli	d__Bacteria; p__Bacteroidota; c__Bacteroidia; o__Sphingobacteriales; f__Sphingobacteriaceae; g__Sphingobacterium; s__Sphingobacterium haloxyli	yes	2100533	yes	yes	0.00035	yes
GCA_900107985.1	Sphingobacterium lactis	d__Bacteria; p__Bacteroidetes; c__Sphingobacteriia; o__Sphingobacteriales; f__Sphingobacteriaceae; g__Sphingobacterium; s__Sphingobacterium lactis	d__Bacteria; p__Bacteroidota; c__Bacteroidia; o__Sphingobacteriales; f__Sphingobacteriaceae; g__Sphingobacterium; s__Sphingobacterium lactis	yes	797291	yes	yes	0.0021	yes
GCA_900187125.1	Sphingobacterium mizutaii	d__Bacteria; p__Bacteroidetes; c__Sphingobacteriia; o__Sphingobacteriales; f__Sphingobacteriaceae; g__Sphingobacterium; s__Sphingobacterium mizutaii	d__Bacteria; p__Bacteroidota; c__Bacteroidia; o__Sphingobacteriales; f__Sphingobacteriaceae; g__Sphingobacterium; s__Sphingobacterium mizutaii	no
GCA_900457465.1	Sphingobacterium multivorum	d__Bacteria; p__Bacteroidetes; c__Sphingobacteriia; o__Sphingobacteriales; f__Sphingobacteriaceae; g__Sphingobacterium; s__Sphingobacterium multivorum	d__Bacteria; p__Bacteroidota; c__Bacteroidia; o__Sphingobacteriales; f__Sphingobacteriaceae; g__Sphingobacterium; s__Sphingobacterium multivorum	yes	28454	yes	yes	5.1e-05	yes
GCA_900168125.1	Sphingobacterium nematocida	d__Bacteria; p__Bacteroidetes; c__Sphingobacteriia; o__Sphingobacteriales; f__Sphingobacteriaceae; g__Sphingobacterium; s__Sphingobacterium nematocida	d__Bacteria; p__Bacteroidota; c__Bacteroidia; o__Sphingobacteriales; f__Sphingobacteriaceae; g__Sphingobacterium; s__Sphingobacterium nematocida	yes	1513896	yes	yes	0.00036	yes
GCA_004364125.1	Sphingobacterium paludis	d__Bacteria; p__Bacteroidetes; c__Sphingobacteriia; o__Sphingobacteriales; f__Sphingobacteriaceae; g__Sphingobacterium; s__Sphingobacterium paludis	d__Bacteria; p__Bacteroidota; c__Bacteroidia; o__Sphingobacteriales; f__Sphingobacteriaceae; g__Sphingobacterium; s__Sphingobacterium paludis	no
GCA_000416985.1	Sphingobacterium paucimobilis HER1398	d__Bacteria; p__Bacteroidetes; c__Sphingobacteriia; o__Sphingobacteriales; f__Sphingobacteriaceae; g__Sphingobacterium; s__Sphingobacterium paucimobilis	d__Bacteria; p__Bacteroidota; c__Bacteroidia; o__Sphingobacteriales; f__Sphingobacteriaceae; g__Sphingobacterium; s__Sphingobacterium paucimobilis	yes	1346330	yes	yes	0.00021	yes
GCA_900177625.1	Sphingobacterium psychroaquaticum	d__Bacteria; p__Bacteroidetes; c__Sphingobacteriia; o__Sphingobacteriales; f__Sphingobacteriaceae; g__Sphingobacterium; s__Sphingobacterium psychroaquaticum	d__Bacteria; p__Bacteroidota; c__Bacteroidia; o__Sphingobacteriales; f__Sphingobacteriaceae; g__Sphingobacterium; s__Sphingobacterium psychroaquaticum	yes	561061	yes	yes	0.00082	yes
GCA_000143765.1	Sphingobacterium spiritivorum ATCC 33861	d__Bacteria; p__Bacteroidetes; c__Sphingobacteriia; o__Sphingobacteriales; f__Sphingobacteriaceae; g__Sphingobacterium; s__Sphingobacterium spiritivorum	d__Bacteria; p__Bacteroidota; c__Bacteroidia; o__Sphingobacteriales; f__Sphingobacteriaceae; g__Sphingobacterium; s__Sphingobacterium spiritivorum	yes	525373	no
GCA_901482695.1	Sphingobacterium thalpophilum	d__Bacteria; p__Bacteroidetes; c__Sphingobacteriia; o__Sphingobacteriales; f__Sphingobacteriaceae; g__Sphingobacterium; s__Sphingobacterium thalpophilum	d__Bacteria; p__Bacteroidota; c__Bacteroidia; o__Sphingobacteriales; f__Sphingobacteriaceae; g__Sphingobacterium; s__Sphingobacterium thalpophilum	yes	259	yes	yes	7.5e-05	yes
GCA_900116225.1	Sphingobacterium wenxiniae	d__Bacteria; p__Bacteroidetes; c__Sphingobacteriia; o__Sphingobacteriales; f__Sphingobacteriaceae; g__Sphingobacterium; s__Sphingobacterium wenxiniae	d__Bacteria; p__Bacteroidota; c__Bacteroidia; o__Sphingobacteriales; f__Sphingobacteriaceae; g__Sphingobacterium; s__Sphingobacterium wenxiniae	yes	683125	yes	yes	7.1e-06	yes
GCA_004363245.1	Sphingobacterium yanglingense	d__Bacteria; p__Bacteroidetes; c__Sphingobacteriia; o__Sphingobacteriales; f__Sphingobacteriaceae; g__Sphingobacterium; s__Sphingobacterium yanglingense	d__Bacteria; p__Bacteroidota; c__Bacteroidia; o__Sphingobacteriales; f__Sphingobacteriaceae; g__Sphingobacterium; s__Sphingobacterium yanglingense	yes	1437280	yes	yes	0.00036	yes
GCA_002934545.1	Bacteroides xylanolyticus	d__Bacteria; p__Bacteroidetes; c__Bacteroidia; o__Bacteroidales; f__Bacteroidaceae; g__Bacteroides; s__Bacteroides xylanolyticus	d__Bacteria; p__Firmicutes_A; c__Clostridia; o__Lachnospirales; f__Lachnospiraceae; g__Hungatella; s__Hungatella xylanolytica	no
GCA_900167375.1	Anaerorhabdus furcosa	d__Bacteria; p__Bacteroidetes; c__Bacteroidia; o__Bacteroidales; f__Bacteroidaceae; g__Anaerorhabdus; s__Anaerorhabdus furcosa	d__Bacteria; p__Firmicutes; c__Bacilli; o__Erysipelotrichales; f__Erysipelotrichaceae; g__Anaerorhabdus; s__Anaerorhabdus furcosa	no
